# Supplementary material for: Uncovering Revenue Trends: Predictive Analytics with Linear Regression and Time Series in Coffee Shop Transactions
Source: Research Square preprint supplement (doi:10.21203/rs.3.rs-6306879/v1), 2025-03-27
Supplement: Supplementary file 1 [file 6aa3f2b0f25d99544fa07b3d.xlsx]

## Sheet: Pivot Tables
Row Labels	Sum of Revenue
Jan	81677.7
Feb	76145.2
Mar	98834.7
Apr	118941
May	156728
Jun	166486
Grand Total	698812
Row Labels	Count of transaction_id
Sun	21096
Mon	21643
Tue	21202
Wed	21310
Thu	21654
Fri	21701
Sat	20510
Grand Total	149116
Row Labels	Count of transaction_id
6	4594
7	13428
8	17654
9	17764
10	18545
11	9766
12	8708
13	8714
14	8933
15	8979
16	9093
17	8745
18	7498
19	6092
20	603
Grand Total	149116
Row Labels	Count of transaction_id
Bakery	22796
Branded	747
Coffee	58416
Coffee beans	1753
Drinking Chocolate	11468
Flavours	6790
Loose Tea	1210
Packaged Chocolate	487
Tea	45449
Grand Total	149116
Row Labels	Sum of Revenue
Barista Espresso	91406.2
Brewed Chai tea	77081.9
Hot chocolate	72416
Gourmet brewed coffee	70034.6
Brewed Black tea	47932
Brewed herbal tea	47539.5
Premium brewed coffee	38781.1
Organic brewed coffee	37746.5
Scone	36866.1
Drip coffee	31984
Pastry	25656
Brewed Green tea	23852.5
Biscotti	19793.5
Premium Beans	14583.5
Organic Beans	8509.5
Grand Total	644183

## Sheet: Dashboard
Coffee Shop Sales Dashboard

## Sheet: Transactions
transaction_id	transaction_date	transaction_time	transaction_qty	store_id	store_location	product_id	unit_price	product_category	product_type	product_detail	Revenue	Month	Month	Weekday	Weekday	Hour
1	2023-01-01	07:06:11	2	5	Lower Manhattan	32	3	Coffee	Gourmet brewed coffee	Ethiopia Rg	6	1	Jan	7	Sun	7
2	2023-01-01	07:08:56	2	5	Lower Manhattan	57	3.1	Tea	Brewed Chai tea	Spicy Eye Opener Chai Lg	6.2	1	Jan	7	Sun	7
3	2023-01-01	07:14:04	2	5	Lower Manhattan	59	4.5	Drinking Chocolate	Hot chocolate	Dark chocolate Lg	9	1	Jan	7	Sun	7
4	2023-01-01	07:20:24	1	5	Lower Manhattan	22	2	Coffee	Drip coffee	Our Old Time Diner Blend Sm	2	1	Jan	7	Sun	7
5	2023-01-01	07:22:41	2	5	Lower Manhattan	57	3.1	Tea	Brewed Chai tea	Spicy Eye Opener Chai Lg	6.2	1	Jan	7	Sun	7
6	2023-01-01	07:22:41	1	5	Lower Manhattan	77	3	Bakery	Scone	Oatmeal Scone	3	1	Jan	7	Sun	7
7	2023-01-01	07:25:49	1	5	Lower Manhattan	22	2	Coffee	Drip coffee	Our Old Time Diner Blend Sm	2	1	Jan	7	Sun	7
8	2023-01-01	07:33:34	2	5	Lower Manhattan	28	2	Coffee	Gourmet brewed coffee	Columbian Medium Roast Sm	4	1	Jan	7	Sun	7
9	2023-01-01	07:39:13	1	5	Lower Manhattan	39	4.25	Coffee	Barista Espresso	Latte Rg	4.25	1	Jan	7	Sun	7
10	2023-01-01	07:39:34	2	5	Lower Manhattan	58	3.5	Drinking Chocolate	Hot chocolate	Dark chocolate Rg	7	1	Jan	7	Sun	7
11	2023-01-01	07:43:05	1	5	Lower Manhattan	56	2.55	Tea	Brewed Chai tea	Spicy Eye Opener Chai Rg	2.55	1	Jan	7	Sun	7
12	2023-01-01	07:44:35	2	5	Lower Manhattan	33	3.5	Coffee	Gourmet brewed coffee	Ethiopia Lg	7	1	Jan	7	Sun	7
13	2023-01-01	07:45:51	1	5	Lower Manhattan	51	3	Tea	Brewed Black tea	Earl Grey Lg	3	1	Jan	7	Sun	7
14	2023-01-01	07:48:19	1	5	Lower Manhattan	57	3.1	Tea	Brewed Chai tea	Spicy Eye Opener Chai Lg	3.1	1	Jan	7	Sun	7
15	2023-01-01	07:52:36	2	5	Lower Manhattan	87	3	Coffee	Barista Espresso	Ouro Brasileiro shot	6	1	Jan	7	Sun	7
16	2023-01-01	07:59:58	2	5	Lower Manhattan	47	3	Tea	Brewed Green tea	Serenity Green Tea Lg	6	1	Jan	7	Sun	7
17	2023-01-01	07:59:58	1	5	Lower Manhattan	79	3.75	Bakery	Scone	Jumbo Savory Scone	3.75	1	Jan	7	Sun	7
18	2023-01-01	08:00:18	1	8	Hell's Kitchen	42	2.5	Tea	Brewed herbal tea	Lemon Grass Rg	2.5	1	Jan	7	Sun	8
19	2023-01-01	08:00:39	2	8	Hell's Kitchen	59	4.5	Drinking Chocolate	Hot chocolate	Dark chocolate Lg	9	1	Jan	7	Sun	8
20	2023-01-01	08:11:45	1	8	Hell's Kitchen	61	4.75	Drinking Chocolate	Hot chocolate	Sustainably Grown Organic Lg	4.75	1	Jan	7	Sun	8
21	2023-01-01	08:17:27	2	8	Hell's Kitchen	33	3.5	Coffee	Gourmet brewed coffee	Ethiopia Lg	7	1	Jan	7	Sun	8
22	2023-01-01	08:24:26	2	5	Lower Manhattan	56	2.55	Tea	Brewed Chai tea	Spicy Eye Opener Chai Rg	5.1	1	Jan	7	Sun	8
23	2023-01-01	08:24:26	1	5	Lower Manhattan	69	3.25	Bakery	Biscotti	Hazelnut Biscotti	3.25	1	Jan	7	Sun	8
24	2023-01-01	08:29:38	1	8	Hell's Kitchen	56	2.55	Tea	Brewed Chai tea	Spicy Eye Opener Chai Rg	2.55	1	Jan	7	Sun	8
25	2023-01-01	08:31:23	1	8	Hell's Kitchen	40	3.75	Coffee	Barista Espresso	Cappuccino	3.75	1	Jan	7	Sun	8
26	2023-01-01	08:33:08	1	5	Lower Manhattan	43	3	Tea	Brewed herbal tea	Lemon Grass Lg	3	1	Jan	7	Sun	8
27	2023-01-01	08:33:08	1	5	Lower Manhattan	76	3.5	Bakery	Biscotti	Chocolate Chip Biscotti	3.5	1	Jan	7	Sun	8
28	2023-01-01	08:35:03	2	5	Lower Manhattan	45	3	Tea	Brewed herbal tea	Peppermint Lg	6	1	Jan	7	Sun	8
29	2023-01-01	08:35:03	1	5	Lower Manhattan	71	3.75	Bakery	Pastry	Chocolate Croissant	3.75	1	Jan	7	Sun	8
30	2023-01-01	08:41:57	2	8	Hell's Kitchen	40	3.75	Coffee	Barista Espresso	Cappuccino	7.5	1	Jan	7	Sun	8
31	2023-01-01	08:52:03	1	8	Hell's Kitchen	38	3.75	Coffee	Barista Espresso	Latte	3.75	1	Jan	7	Sun	8
32	2023-01-01	08:52:32	1	5	Lower Manhattan	26	3	Coffee	Organic brewed coffee	Brazilian Rg	3	1	Jan	7	Sun	8
33	2023-01-01	08:54:33	2	5	Lower Manhattan	27	3.5	Coffee	Organic brewed coffee	Brazilian Lg	7	1	Jan	7	Sun	8
34	2023-01-01	08:56:27	2	5	Lower Manhattan	29	2.5	Coffee	Gourmet brewed coffee	Columbian Medium Roast Rg	5	1	Jan	7	Sun	8
35	2023-01-01	08:57:46	1	8	Hell's Kitchen	54	2.5	Tea	Brewed Chai tea	Morning Sunrise Chai Rg	2.5	1	Jan	7	Sun	8
36	2023-01-01	08:58:55	1	5	Lower Manhattan	26	3	Coffee	Organic brewed coffee	Brazilian Rg	3	1	Jan	7	Sun	8
37	2023-01-01	09:00:12	1	5	Lower Manhattan	55	4	Tea	Brewed Chai tea	Morning Sunrise Chai Lg	4	1	Jan	7	Sun	9
38	2023-01-01	09:00:24	2	8	Hell's Kitchen	40	3.75	Coffee	Barista Espresso	Cappuccino	7.5	1	Jan	7	Sun	9
39	2023-01-01	09:07:13	1	8	Hell's Kitchen	45	3	Tea	Brewed herbal tea	Peppermint Lg	3	1	Jan	7	Sun	9
40	2023-01-01	09:08:09	2	8	Hell's Kitchen	45	3	Tea	Brewed herbal tea	Peppermint Lg	6	1	Jan	7	Sun	9
41	2023-01-01	09:08:13	1	8	Hell's Kitchen	24	3	Coffee	Drip coffee	Our Old Time Diner Blend Lg	3	1	Jan	7	Sun	9
42	2023-01-01	09:10:30	2	5	Lower Manhattan	60	3.75	Drinking Chocolate	Hot chocolate	Sustainably Grown Organic Rg	7.5	1	Jan	7	Sun	9
43	2023-01-01	09:10:30	1	5	Lower Manhattan	78	4.5	Bakery	Scone	Scottish Cream Scone	4.5	1	Jan	7	Sun	9
44	2023-01-01	09:11:06	1	5	Lower Manhattan	56	2.55	Tea	Brewed Chai tea	Spicy Eye Opener Chai Rg	2.55	1	Jan	7	Sun	9
45	2023-01-01	09:11:06	1	5	Lower Manhattan	77	3	Bakery	Scone	Oatmeal Scone	3	1	Jan	7	Sun	9
46	2023-01-01	09:13:01	1	5	Lower Manhattan	44	2.5	Tea	Brewed herbal tea	Peppermint Rg	2.5	1	Jan	7	Sun	9
47	2023-01-01	09:13:15	2	5	Lower Manhattan	56	2.55	Tea	Brewed Chai tea	Spicy Eye Opener Chai Rg	5.1	1	Jan	7	Sun	9
48	2023-01-01	09:14:16	1	5	Lower Manhattan	48	2.5	Tea	Brewed Black tea	English Breakfast Rg	2.5	1	Jan	7	Sun	9
49	2023-01-01	09:14:17	1	8	Hell's Kitchen	23	2.5	Coffee	Drip coffee	Our Old Time Diner Blend Rg	2.5	1	Jan	7	Sun	9
50	2023-01-01	09:14:25	1	8	Hell's Kitchen	46	2.5	Tea	Brewed Green tea	Serenity Green Tea Rg	2.5	1	Jan	7	Sun	9
51	2023-01-01	09:14:41	1	8	Hell's Kitchen	32	3	Coffee	Gourmet brewed coffee	Ethiopia Rg	3	1	Jan	7	Sun	9
52	2023-01-01	09:15:09	2	5	Lower Manhattan	47	3	Tea	Brewed Green tea	Serenity Green Tea Lg	6	1	Jan	7	Sun	9
53	2023-01-01	09:15:13	2	5	Lower Manhattan	43	3	Tea	Brewed herbal tea	Lemon Grass Lg	6	1	Jan	7	Sun	9
54	2023-01-01	09:19:21	2	5	Lower Manhattan	25	2.2	Coffee	Organic brewed coffee	Brazilian Sm	4.4	1	Jan	7	Sun	9
55	2023-01-01	09:19:26	1	8	Hell's Kitchen	59	4.5	Drinking Chocolate	Hot chocolate	Dark chocolate Lg	4.5	1	Jan	7	Sun	9
56	2023-01-01	09:21:08	1	5	Lower Manhattan	38	3.75	Coffee	Barista Espresso	Latte	3.75	1	Jan	7	Sun	9
57	2023-01-01	09:22:17	1	8	Hell's Kitchen	45	3	Tea	Brewed herbal tea	Peppermint Lg	3	1	Jan	7	Sun	9
58	2023-01-01	09:22:46	1	5	Lower Manhattan	34	2.45	Coffee	Premium brewed coffee	Jamaican Coffee River Sm	2.45	1	Jan	7	Sun	9
59	2023-01-01	09:29:56	2	8	Hell's Kitchen	36	3.75	Coffee	Premium brewed coffee	Jamaican Coffee River Lg	7.5	1	Jan	7	Sun	9
60	2023-01-01	09:29:56	1	8	Hell's Kitchen	74	3.5	Bakery	Biscotti	Ginger Biscotti	3.5	1	Jan	7	Sun	9
61	2023-01-01	09:29:57	1	8	Hell's Kitchen	53	3	Tea	Brewed Chai tea	Traditional Blend Chai Lg	3	1	Jan	7	Sun	9
62	2023-01-01	09:34:17	2	8	Hell's Kitchen	41	4.25	Coffee	Barista Espresso	Cappuccino Lg	8.5	1	Jan	7	Sun	9
63	2023-01-01	09:40:13	1	5	Lower Manhattan	41	4.25	Coffee	Barista Espresso	Cappuccino Lg	4.25	1	Jan	7	Sun	9
64	2023-01-01	09:41:22	2	5	Lower Manhattan	45	3	Tea	Brewed herbal tea	Peppermint Lg	6	1	Jan	7	Sun	9
65	2023-01-01	09:41:22	1	5	Lower Manhattan	79	3.75	Bakery	Scone	Jumbo Savory Scone	3.75	1	Jan	7	Sun	9
66	2023-01-01	09:44:20	2	5	Lower Manhattan	54	2.5	Tea	Brewed Chai tea	Morning Sunrise Chai Rg	5	1	Jan	7	Sun	9
67	2023-01-01	09:44:46	1	5	Lower Manhattan	24	3	Coffee	Drip coffee	Our Old Time Diner Blend Lg	3	1	Jan	7	Sun	9
68	2023-01-01	09:46:46	2	5	Lower Manhattan	37	3	Coffee	Barista Espresso	Espresso shot	6	1	Jan	7	Sun	9
69	2023-01-01	09:47:40	2	8	Hell's Kitchen	40	3.75	Coffee	Barista Espresso	Cappuccino	7.5	1	Jan	7	Sun	9
70	2023-01-01	09:50:44	2	5	Lower Manhattan	37	3	Coffee	Barista Espresso	Espresso shot	6	1	Jan	7	Sun	9
71	2023-01-01	09:50:44	1	5	Lower Manhattan	69	3.25	Bakery	Biscotti	Hazelnut Biscotti	3.25	1	Jan	7	Sun	9
72	2023-01-01	09:52:58	1	5	Lower Manhattan	50	2.5	Tea	Brewed Black tea	Earl Grey Rg	2.5	1	Jan	7	Sun	9
73	2023-01-01	09:53:28	1	8	Hell's Kitchen	47	3	Tea	Brewed Green tea	Serenity Green Tea Lg	3	1	Jan	7	Sun	9
74	2023-01-01	09:53:44	2	8	Hell's Kitchen	40	3.75	Coffee	Barista Espresso	Cappuccino	7.5	1	Jan	7	Sun	9
75	2023-01-01	09:53:44	1	8	Hell's Kitchen	72	3.25	Bakery	Scone	Ginger Scone	3.25	1	Jan	7	Sun	9
76	2023-01-01	09:53:49	1	8	Hell's Kitchen	35	3.1	Coffee	Premium brewed coffee	Jamaican Coffee River Rg	3.1	1	Jan	7	Sun	9
77	2023-01-01	09:54:46	1	5	Lower Manhattan	23	2.5	Coffee	Drip coffee	Our Old Time Diner Blend Rg	2.5	1	Jan	7	Sun	9
78	2023-01-01	09:55:16	2	5	Lower Manhattan	43	3	Tea	Brewed herbal tea	Lemon Grass Lg	6	1	Jan	7	Sun	9
79	2023-01-01	09:56:30	1	8	Hell's Kitchen	22	2	Coffee	Drip coffee	Our Old Time Diner Blend Sm	2	1	Jan	7	Sun	9
80	2023-01-01	10:00:39	2	8	Hell's Kitchen	32	3	Coffee	Gourmet brewed coffee	Ethiopia Rg	6	1	Jan	7	Sun	10
81	2023-01-01	10:03:55	2	8	Hell's Kitchen	36	3.75	Coffee	Premium brewed coffee	Jamaican Coffee River Lg	7.5	1	Jan	7	Sun	10
82	2023-01-01	10:14:49	1	5	Lower Manhattan	26	3	Coffee	Organic brewed coffee	Brazilian Rg	3	1	Jan	7	Sun	10
83	2023-01-01	10:14:49	1	5	Lower Manhattan	71	3.75	Bakery	Pastry	Chocolate Croissant	3.75	1	Jan	7	Sun	10
84	2023-01-01	10:16:30	2	5	Lower Manhattan	32	3	Coffee	Gourmet brewed coffee	Ethiopia Rg	6	1	Jan	7	Sun	10
85	2023-01-01	10:16:33	1	8	Hell's Kitchen	54	2.5	Tea	Brewed Chai tea	Morning Sunrise Chai Rg	2.5	1	Jan	7	Sun	10
86	2023-01-01	10:18:14	2	8	Hell's Kitchen	41	4.25	Coffee	Barista Espresso	Cappuccino Lg	8.5	1	Jan	7	Sun	10
87	2023-01-01	10:18:52	2	5	Lower Manhattan	25	2.2	Coffee	Organic brewed coffee	Brazilian Sm	4.4	1	Jan	7	Sun	10
88	2023-01-01	10:19:42	2	5	Lower Manhattan	23	2.5	Coffee	Drip coffee	Our Old Time Diner Blend Rg	5	1	Jan	7	Sun	10
89	2023-01-01	10:24:19	1	8	Hell's Kitchen	54	2.5	Tea	Brewed Chai tea	Morning Sunrise Chai Rg	2.5	1	Jan	7	Sun	10
90	2023-01-01	10:25:22	2	8	Hell's Kitchen	56	2.55	Tea	Brewed Chai tea	Spicy Eye Opener Chai Rg	5.1	1	Jan	7	Sun	10
91	2023-01-01	10:25:45	2	5	Lower Manhattan	58	3.5	Drinking Chocolate	Hot chocolate	Dark chocolate Rg	7	1	Jan	7	Sun	10
92	2023-01-01	10:25:45	1	5	Lower Manhattan	74	3.5	Bakery	Biscotti	Ginger Biscotti	3.5	1	Jan	7	Sun	10
93	2023-01-01	10:27:48	2	8	Hell's Kitchen	47	3	Tea	Brewed Green tea	Serenity Green Tea Lg	6	1	Jan	7	Sun	10
94	2023-01-01	10:30:07	1	5	Lower Manhattan	35	3.1	Coffee	Premium brewed coffee	Jamaican Coffee River Rg	3.1	1	Jan	7	Sun	10
95	2023-01-01	10:30:07	1	5	Lower Manhattan	70	3.25	Bakery	Scone	Cranberry Scone	3.25	1	Jan	7	Sun	10
96	2023-01-01	10:35:47	1	8	Hell's Kitchen	60	3.75	Drinking Chocolate	Hot chocolate	Sustainably Grown Organic Rg	3.75	1	Jan	7	Sun	10
97	2023-01-01	10:41:53	1	5	Lower Manhattan	59	4.5	Drinking Chocolate	Hot chocolate	Dark chocolate Lg	4.5	1	Jan	7	Sun	10
98	2023-01-01	10:47:53	2	5	Lower Manhattan	36	3.75	Coffee	Premium brewed coffee	Jamaican Coffee River Lg	7.5	1	Jan	7	Sun	10
99	2023-01-01	10:49:13	2	8	Hell's Kitchen	51	3	Tea	Brewed Black tea	Earl Grey Lg	6	1	Jan	7	Sun	10
100	2023-01-01	10:49:51	2	5	Lower Manhattan	61	4.75	Drinking Chocolate	Hot chocolate	Sustainably Grown Organic Lg	9.5	1	Jan	7	Sun	10
101	2023-01-01	10:51:17	1	5	Lower Manhattan	47	3	Tea	Brewed Green tea	Serenity Green Tea Lg	3	1	Jan	7	Sun	10
102	2023-01-01	10:52:44	2	8	Hell's Kitchen	23	2.5	Coffee	Drip coffee	Our Old Time Diner Blend Rg	5	1	Jan	7	Sun	10
103	2023-01-01	10:52:44	1	8	Hell's Kitchen	73	3.75	Bakery	Pastry	Almond Croissant	3.75	1	Jan	7	Sun	10
104	2023-01-01	10:56:14	1	5	Lower Manhattan	38	3.75	Coffee	Barista Espresso	Latte	3.75	1	Jan	7	Sun	10
105	2023-01-01	10:56:14	1	5	Lower Manhattan	76	3.5	Bakery	Biscotti	Chocolate Chip Biscotti	3.5	1	Jan	7	Sun	10
106	2023-01-01	11:01:48	1	3	Astoria	22	2	Coffee	Drip coffee	Our Old Time Diner Blend Sm	2	1	Jan	7	Sun	11
107	2023-01-01	11:01:58	1	3	Astoria	38	3.75	Coffee	Barista Espresso	Latte	3.75	1	Jan	7	Sun	11
108	2023-01-01	11:01:58	1	3	Astoria	75	3.5	Bakery	Pastry	Croissant	3.5	1	Jan	7	Sun	11
109	2023-01-01	11:03:25	2	5	Lower Manhattan	47	3	Tea	Brewed Green tea	Serenity Green Tea Lg	6	1	Jan	7	Sun	11
110	2023-01-01	11:03:25	1	5	Lower Manhattan	75	3.5	Bakery	Pastry	Croissant	3.5	1	Jan	7	Sun	11
111	2023-01-01	11:04:32	2	8	Hell's Kitchen	39	4.25	Coffee	Barista Espresso	Latte Rg	8.5	1	Jan	7	Sun	11
112	2023-01-01	11:08:11	1	3	Astoria	59	4.5	Drinking Chocolate	Hot chocolate	Dark chocolate Lg	4.5	1	Jan	7	Sun	11
113	2023-01-01	11:08:59	2	8	Hell's Kitchen	51	3	Tea	Brewed Black tea	Earl Grey Lg	6	1	Jan	7	Sun	11
114	2023-01-01	11:09:01	1	3	Astoria	59	4.5	Drinking Chocolate	Hot chocolate	Dark chocolate Lg	4.5	1	Jan	7	Sun	11
115	2023-01-01	11:10:21	1	3	Astoria	47	3	Tea	Brewed Green tea	Serenity Green Tea Lg	3	1	Jan	7	Sun	11
116	2023-01-01	11:10:21	1	3	Astoria	79	3.75	Bakery	Scone	Jumbo Savory Scone	3.75	1	Jan	7	Sun	11
117	2023-01-01	11:10:58	1	3	Astoria	46	2.5	Tea	Brewed Green tea	Serenity Green Tea Rg	2.5	1	Jan	7	Sun	11
118	2023-01-01	11:12:29	1	3	Astoria	43	3	Tea	Brewed herbal tea	Lemon Grass Lg	3	1	Jan	7	Sun	11
119	2023-01-01	11:16:02	2	3	Astoria	45	3	Tea	Brewed herbal tea	Peppermint Lg	6	1	Jan	7	Sun	11
120	2023-01-01	11:21:00	2	8	Hell's Kitchen	54	2.5	Tea	Brewed Chai tea	Morning Sunrise Chai Rg	5	1	Jan	7	Sun	11
121	2023-01-01	11:21:04	2	5	Lower Manhattan	51	3	Tea	Brewed Black tea	Earl Grey Lg	6	1	Jan	7	Sun	11
122	2023-01-01	11:21:14	1	3	Astoria	60	3.75	Drinking Chocolate	Hot chocolate	Sustainably Grown Organic Rg	3.75	1	Jan	7	Sun	11
123	2023-01-01	11:23:01	1	8	Hell's Kitchen	31	2.2	Coffee	Gourmet brewed coffee	Ethiopia Sm	2.2	1	Jan	7	Sun	11
124	2023-01-01	11:23:43	2	5	Lower Manhattan	60	3.75	Drinking Chocolate	Hot chocolate	Sustainably Grown Organic Rg	7.5	1	Jan	7	Sun	11
125	2023-01-01	11:23:43	1	5	Lower Manhattan	77	3	Bakery	Scone	Oatmeal Scone	3	1	Jan	7	Sun	11
126	2023-01-01	11:25:35	2	3	Astoria	49	3	Tea	Brewed Black tea	English Breakfast Lg	6	1	Jan	7	Sun	11
127	2023-01-01	11:25:37	2	5	Lower Manhattan	40	3.75	Coffee	Barista Espresso	Cappuccino	7.5	1	Jan	7	Sun	11
128	2023-01-01	11:28:15	2	8	Hell's Kitchen	44	2.5	Tea	Brewed herbal tea	Peppermint Rg	5	1	Jan	7	Sun	11
129	2023-01-01	11:28:29	2	3	Astoria	33	3.5	Coffee	Gourmet brewed coffee	Ethiopia Lg	7	1	Jan	7	Sun	11
130	2023-01-01	11:29:25	2	5	Lower Manhattan	56	2.55	Tea	Brewed Chai tea	Spicy Eye Opener Chai Rg	5.1	1	Jan	7	Sun	11
131	2023-01-01	11:29:57	2	8	Hell's Kitchen	35	3.1	Coffee	Premium brewed coffee	Jamaican Coffee River Rg	6.2	1	Jan	7	Sun	11
132	2023-01-01	11:29:57	1	8	Hell's Kitchen	78	4.5	Bakery	Scone	Scottish Cream Scone	4.5	1	Jan	7	Sun	11
133	2023-01-01	11:30:22	1	8	Hell's Kitchen	23	2.5	Coffee	Drip coffee	Our Old Time Diner Blend Rg	2.5	1	Jan	7	Sun	11
134	2023-01-01	11:31:35	1	8	Hell's Kitchen	24	3	Coffee	Drip coffee	Our Old Time Diner Blend Lg	3	1	Jan	7	Sun	11
135	2023-01-01	11:31:43	2	5	Lower Manhattan	51	3	Tea	Brewed Black tea	Earl Grey Lg	6	1	Jan	7	Sun	11
136	2023-01-01	11:31:43	1	5	Lower Manhattan	72	3.25	Bakery	Scone	Ginger Scone	3.25	1	Jan	7	Sun	11
137	2023-01-01	11:31:53	2	5	Lower Manhattan	54	2.5	Tea	Brewed Chai tea	Morning Sunrise Chai Rg	5	1	Jan	7	Sun	11
138	2023-01-01	11:31:53	1	5	Lower Manhattan	75	3.5	Bakery	Pastry	Croissant	3.5	1	Jan	7	Sun	11
139	2023-01-01	11:39:14	1	5	Lower Manhattan	60	3.75	Drinking Chocolate	Hot chocolate	Sustainably Grown Organic Rg	3.75	1	Jan	7	Sun	11
140	2023-01-01	11:39:14	1	5	Lower Manhattan	71	3.75	Bakery	Pastry	Chocolate Croissant	3.75	1	Jan	7	Sun	11
141	2023-01-01	11:40:26	2	3	Astoria	52	2.5	Tea	Brewed Chai tea	Traditional Blend Chai Rg	5	1	Jan	7	Sun	11
142	2023-01-01	11:43:57	2	3	Astoria	25	2.2	Coffee	Organic brewed coffee	Brazilian Sm	4.4	1	Jan	7	Sun	11
143	2023-01-01	11:44:09	1	5	Lower Manhattan	38	3.75	Coffee	Barista Espresso	Latte	3.75	1	Jan	7	Sun	11
144	2023-01-01	11:47:13	1	3	Astoria	30	3	Coffee	Gourmet brewed coffee	Columbian Medium Roast Lg	3	1	Jan	7	Sun	11
145	2023-01-01	11:48:56	2	8	Hell's Kitchen	50	2.5	Tea	Brewed Black tea	Earl Grey Rg	5	1	Jan	7	Sun	11
146	2023-01-01	11:49:42	1	8	Hell's Kitchen	54	2.5	Tea	Brewed Chai tea	Morning Sunrise Chai Rg	2.5	1	Jan	7	Sun	11
147	2023-01-01	11:49:42	1	8	Hell's Kitchen	72	3.25	Bakery	Scone	Ginger Scone	3.25	1	Jan	7	Sun	11
148	2023-01-01	11:50:16	2	3	Astoria	26	3	Coffee	Organic brewed coffee	Brazilian Rg	6	1	Jan	7	Sun	11
149	2023-01-01	11:50:23	2	3	Astoria	36	3.75	Coffee	Premium brewed coffee	Jamaican Coffee River Lg	7.5	1	Jan	7	Sun	11
150	2023-01-01	11:50:58	2	5	Lower Manhattan	45	3	Tea	Brewed herbal tea	Peppermint Lg	6	1	Jan	7	Sun	11
151	2023-01-01	11:51:30	2	8	Hell's Kitchen	33	3.5	Coffee	Gourmet brewed coffee	Ethiopia Lg	7	1	Jan	7	Sun	11
152	2023-01-01	11:52:31	1	5	Lower Manhattan	57	3.1	Tea	Brewed Chai tea	Spicy Eye Opener Chai Lg	3.1	1	Jan	7	Sun	11
153	2023-01-01	11:57:17	2	3	Astoria	37	3	Coffee	Barista Espresso	Espresso shot	6	1	Jan	7	Sun	11
154	2023-01-01	11:57:59	1	3	Astoria	50	2.5	Tea	Brewed Black tea	Earl Grey Rg	2.5	1	Jan	7	Sun	11
155	2023-01-01	11:57:59	1	3	Astoria	79	3.75	Bakery	Scone	Jumbo Savory Scone	3.75	1	Jan	7	Sun	11
156	2023-01-01	11:58:15	2	3	Astoria	60	3.75	Drinking Chocolate	Hot chocolate	Sustainably Grown Organic Rg	7.5	1	Jan	7	Sun	11
157	2023-01-01	12:00:20	1	5	Lower Manhattan	29	2.5	Coffee	Gourmet brewed coffee	Columbian Medium Roast Rg	2.5	1	Jan	7	Sun	12
158	2023-01-01	12:01:00	2	3	Astoria	49	3	Tea	Brewed Black tea	English Breakfast Lg	6	1	Jan	7	Sun	12
159	2023-01-01	12:01:20	2	3	Astoria	35	3.1	Coffee	Premium brewed coffee	Jamaican Coffee River Rg	6.2	1	Jan	7	Sun	12
160	2023-01-01	12:01:20	1	3	Astoria	75	3.5	Bakery	Pastry	Croissant	3.5	1	Jan	7	Sun	12
161	2023-01-01	12:03:09	1	8	Hell's Kitchen	36	3.75	Coffee	Premium brewed coffee	Jamaican Coffee River Lg	3.75	1	Jan	7	Sun	12
162	2023-01-01	12:03:38	1	8	Hell's Kitchen	47	3	Tea	Brewed Green tea	Serenity Green Tea Lg	3	1	Jan	7	Sun	12
163	2023-01-01	12:03:43	1	3	Astoria	44	2.5	Tea	Brewed herbal tea	Peppermint Rg	2.5	1	Jan	7	Sun	12
164	2023-01-01	12:04:22	2	8	Hell's Kitchen	27	3.5	Coffee	Organic brewed coffee	Brazilian Lg	7	1	Jan	7	Sun	12
165	2023-01-01	12:05:31	2	3	Astoria	52	2.5	Tea	Brewed Chai tea	Traditional Blend Chai Rg	5	1	Jan	7	Sun	12
166	2023-01-01	12:06:29	1	5	Lower Manhattan	46	2.5	Tea	Brewed Green tea	Serenity Green Tea Rg	2.5	1	Jan	7	Sun	12
167	2023-01-01	12:07:42	1	8	Hell's Kitchen	24	3	Coffee	Drip coffee	Our Old Time Diner Blend Lg	3	1	Jan	7	Sun	12
168	2023-01-01	12:08:21	1	5	Lower Manhattan	43	3	Tea	Brewed herbal tea	Lemon Grass Lg	3	1	Jan	7	Sun	12
169	2023-01-01	12:08:36	1	8	Hell's Kitchen	35	3.1	Coffee	Premium brewed coffee	Jamaican Coffee River Rg	3.1	1	Jan	7	Sun	12
170	2023-01-01	12:09:11	2	3	Astoria	28	2	Coffee	Gourmet brewed coffee	Columbian Medium Roast Sm	4	1	Jan	7	Sun	12
171	2023-01-01	12:09:12	2	8	Hell's Kitchen	50	2.5	Tea	Brewed Black tea	Earl Grey Rg	5	1	Jan	7	Sun	12
172	2023-01-01	12:13:07	2	5	Lower Manhattan	38	3.75	Coffee	Barista Espresso	Latte	7.5	1	Jan	7	Sun	12
173	2023-01-01	12:14:26	2	8	Hell's Kitchen	35	3.1	Coffee	Premium brewed coffee	Jamaican Coffee River Rg	6.2	1	Jan	7	Sun	12
174	2023-01-01	12:17:38	2	8	Hell's Kitchen	50	2.5	Tea	Brewed Black tea	Earl Grey Rg	5	1	Jan	7	Sun	12
175	2023-01-01	12:18:07	2	5	Lower Manhattan	25	2.2	Coffee	Organic brewed coffee	Brazilian Sm	4.4	1	Jan	7	Sun	12
176	2023-01-01	12:18:44	2	3	Astoria	49	3	Tea	Brewed Black tea	English Breakfast Lg	6	1	Jan	7	Sun	12
177	2023-01-01	12:20:16	2	3	Astoria	60	3.75	Drinking Chocolate	Hot chocolate	Sustainably Grown Organic Rg	7.5	1	Jan	7	Sun	12
178	2023-01-01	12:23:39	1	3	Astoria	24	3	Coffee	Drip coffee	Our Old Time Diner Blend Lg	3	1	Jan	7	Sun	12
179	2023-01-01	12:27:06	2	5	Lower Manhattan	41	4.25	Coffee	Barista Espresso	Cappuccino Lg	8.5	1	Jan	7	Sun	12
180	2023-01-01	12:30:46	2	3	Astoria	44	2.5	Tea	Brewed herbal tea	Peppermint Rg	5	1	Jan	7	Sun	12
181	2023-01-01	12:30:49	1	8	Hell's Kitchen	38	3.75	Coffee	Barista Espresso	Latte	3.75	1	Jan	7	Sun	12
182	2023-01-01	12:33:20	2	3	Astoria	54	2.5	Tea	Brewed Chai tea	Morning Sunrise Chai Rg	5	1	Jan	7	Sun	12
183	2023-01-01	12:33:35	2	3	Astoria	29	2.5	Coffee	Gourmet brewed coffee	Columbian Medium Roast Rg	5	1	Jan	7	Sun	12
184	2023-01-01	12:35:53	2	5	Lower Manhattan	31	2.2	Coffee	Gourmet brewed coffee	Ethiopia Sm	4.4	1	Jan	7	Sun	12
185	2023-01-01	12:36:57	1	8	Hell's Kitchen	60	3.75	Drinking Chocolate	Hot chocolate	Sustainably Grown Organic Rg	3.75	1	Jan	7	Sun	12
186	2023-01-01	12:38:28	2	8	Hell's Kitchen	49	3	Tea	Brewed Black tea	English Breakfast Lg	6	1	Jan	7	Sun	12
187	2023-01-01	12:42:26	1	3	Astoria	53	3	Tea	Brewed Chai tea	Traditional Blend Chai Lg	3	1	Jan	7	Sun	12
188	2023-01-01	12:44:01	1	8	Hell's Kitchen	60	3.75	Drinking Chocolate	Hot chocolate	Sustainably Grown Organic Rg	3.75	1	Jan	7	Sun	12
189	2023-01-01	12:44:31	1	3	Astoria	53	3	Tea	Brewed Chai tea	Traditional Blend Chai Lg	3	1	Jan	7	Sun	12
190	2023-01-01	12:44:32	1	3	Astoria	52	2.5	Tea	Brewed Chai tea	Traditional Blend Chai Rg	2.5	1	Jan	7	Sun	12
191	2023-01-01	12:45:52	2	3	Astoria	28	2	Coffee	Gourmet brewed coffee	Columbian Medium Roast Sm	4	1	Jan	7	Sun	12
192	2023-01-01	12:46:22	1	3	Astoria	56	2.55	Tea	Brewed Chai tea	Spicy Eye Opener Chai Rg	2.55	1	Jan	7	Sun	12
193	2023-01-01	12:46:26	1	3	Astoria	23	2.5	Coffee	Drip coffee	Our Old Time Diner Blend Rg	2.5	1	Jan	7	Sun	12
194	2023-01-01	12:46:55	1	3	Astoria	33	3.5	Coffee	Gourmet brewed coffee	Ethiopia Lg	3.5	1	Jan	7	Sun	12
195	2023-01-01	12:46:55	1	3	Astoria	75	3.5	Bakery	Pastry	Croissant	3.5	1	Jan	7	Sun	12
196	2023-01-01	12:48:08	2	3	Astoria	38	3.75	Coffee	Barista Espresso	Latte	7.5	1	Jan	7	Sun	12
197	2023-01-01	12:49:48	1	8	Hell's Kitchen	30	3	Coffee	Gourmet brewed coffee	Columbian Medium Roast Lg	3	1	Jan	7	Sun	12
198	2023-01-01	12:50:15	1	3	Astoria	59	4.5	Drinking Chocolate	Hot chocolate	Dark chocolate Lg	4.5	1	Jan	7	Sun	12
199	2023-01-01	12:50:28	2	3	Astoria	32	3	Coffee	Gourmet brewed coffee	Ethiopia Rg	6	1	Jan	7	Sun	12
200	2023-01-01	12:51:21	1	8	Hell's Kitchen	53	3	Tea	Brewed Chai tea	Traditional Blend Chai Lg	3	1	Jan	7	Sun	12
201	2023-01-01	12:51:57	1	5	Lower Manhattan	61	4.75	Drinking Chocolate	Hot chocolate	Sustainably Grown Organic Lg	4.75	1	Jan	7	Sun	12
202	2023-01-01	12:51:57	1	5	Lower Manhattan	72	3.25	Bakery	Scone	Ginger Scone	3.25	1	Jan	7	Sun	12
203	2023-01-01	12:52:18	1	5	Lower Manhattan	56	2.55	Tea	Brewed Chai tea	Spicy Eye Opener Chai Rg	2.55	1	Jan	7	Sun	12
204	2023-01-01	12:52:18	1	5	Lower Manhattan	75	3.5	Bakery	Pastry	Croissant	3.5	1	Jan	7	Sun	12
205	2023-01-01	12:53:11	2	8	Hell's Kitchen	29	2.5	Coffee	Gourmet brewed coffee	Columbian Medium Roast Rg	5	1	Jan	7	Sun	12
206	2023-01-01	12:53:59	1	8	Hell's Kitchen	37	3	Coffee	Barista Espresso	Espresso shot	3	1	Jan	7	Sun	12
207	2023-01-01	12:55:25	1	3	Astoria	49	3	Tea	Brewed Black tea	English Breakfast Lg	3	1	Jan	7	Sun	12
208	2023-01-01	12:55:27	1	5	Lower Manhattan	57	3.1	Tea	Brewed Chai tea	Spicy Eye Opener Chai Lg	3.1	1	Jan	7	Sun	12
209	2023-01-01	12:55:27	1	5	Lower Manhattan	75	3.5	Bakery	Pastry	Croissant	3.5	1	Jan	7	Sun	12
210	2023-01-01	12:55:36	1	8	Hell's Kitchen	45	3	Tea	Brewed herbal tea	Peppermint Lg	3	1	Jan	7	Sun	12
211	2023-01-01	12:55:53	2	8	Hell's Kitchen	26	3	Coffee	Organic brewed coffee	Brazilian Rg	6	1	Jan	7	Sun	12
212	2023-01-01	12:56:33	1	3	Astoria	61	4.75	Drinking Chocolate	Hot chocolate	Sustainably Grown Organic Lg	4.75	1	Jan	7	Sun	12
213	2023-01-01	12:56:59	1	3	Astoria	47	3	Tea	Brewed Green tea	Serenity Green Tea Lg	3	1	Jan	7	Sun	12
214	2023-01-01	12:58:54	2	3	Astoria	44	2.5	Tea	Brewed herbal tea	Peppermint Rg	5	1	Jan	7	Sun	12
215	2023-01-01	12:59:06	1	8	Hell's Kitchen	36	3.75	Coffee	Premium brewed coffee	Jamaican Coffee River Lg	3.75	1	Jan	7	Sun	12
216	2023-01-01	13:00:38	2	5	Lower Manhattan	30	3	Coffee	Gourmet brewed coffee	Columbian Medium Roast Lg	6	1	Jan	7	Sun	13
217	2023-01-01	13:01:33	2	5	Lower Manhattan	25	2.2	Coffee	Organic brewed coffee	Brazilian Sm	4.4	1	Jan	7	Sun	13
218	2023-01-01	13:02:40	1	8	Hell's Kitchen	49	3	Tea	Brewed Black tea	English Breakfast Lg	3	1	Jan	7	Sun	13
219	2023-01-01	13:02:40	1	8	Hell's Kitchen	78	4.5	Bakery	Scone	Scottish Cream Scone	4.5	1	Jan	7	Sun	13
220	2023-01-01	13:02:52	1	8	Hell's Kitchen	26	3	Coffee	Organic brewed coffee	Brazilian Rg	3	1	Jan	7	Sun	13
221	2023-01-01	13:03:13	2	3	Astoria	43	3	Tea	Brewed herbal tea	Lemon Grass Lg	6	1	Jan	7	Sun	13
222	2023-01-01	13:04:01	2	8	Hell's Kitchen	25	2.2	Coffee	Organic brewed coffee	Brazilian Sm	4.4	1	Jan	7	Sun	13
223	2023-01-01	13:04:01	1	8	Hell's Kitchen	72	3.25	Bakery	Scone	Ginger Scone	3.25	1	Jan	7	Sun	13
224	2023-01-01	13:04:22	2	8	Hell's Kitchen	42	2.5	Tea	Brewed herbal tea	Lemon Grass Rg	5	1	Jan	7	Sun	13
225	2023-01-01	13:04:37	2	8	Hell's Kitchen	54	2.5	Tea	Brewed Chai tea	Morning Sunrise Chai Rg	5	1	Jan	7	Sun	13
226	2023-01-01	13:04:51	1	3	Astoria	22	2	Coffee	Drip coffee	Our Old Time Diner Blend Sm	2	1	Jan	7	Sun	13
227	2023-01-01	13:05:56	1	3	Astoria	58	3.5	Drinking Chocolate	Hot chocolate	Dark chocolate Rg	3.5	1	Jan	7	Sun	13
228	2023-01-01	13:07:37	2	5	Lower Manhattan	24	3	Coffee	Drip coffee	Our Old Time Diner Blend Lg	6	1	Jan	7	Sun	13
229	2023-01-01	13:09:03	1	3	Astoria	35	3.1	Coffee	Premium brewed coffee	Jamaican Coffee River Rg	3.1	1	Jan	7	Sun	13
230	2023-01-01	13:12:03	2	5	Lower Manhattan	30	3	Coffee	Gourmet brewed coffee	Columbian Medium Roast Lg	6	1	Jan	7	Sun	13
231	2023-01-01	13:13:09	1	5	Lower Manhattan	60	3.75	Drinking Chocolate	Hot chocolate	Sustainably Grown Organic Rg	3.75	1	Jan	7	Sun	13
232	2023-01-01	13:17:30	1	8	Hell's Kitchen	56	2.55	Tea	Brewed Chai tea	Spicy Eye Opener Chai Rg	2.55	1	Jan	7	Sun	13
233	2023-01-01	13:17:32	2	3	Astoria	55	4	Tea	Brewed Chai tea	Morning Sunrise Chai Lg	8	1	Jan	7	Sun	13
234	2023-01-01	13:18:34	2	8	Hell's Kitchen	49	3	Tea	Brewed Black tea	English Breakfast Lg	6	1	Jan	7	Sun	13
235	2023-01-01	13:19:09	1	8	Hell's Kitchen	55	4	Tea	Brewed Chai tea	Morning Sunrise Chai Lg	4	1	Jan	7	Sun	13
236	2023-01-01	13:19:09	1	8	Hell's Kitchen	75	3.5	Bakery	Pastry	Croissant	3.5	1	Jan	7	Sun	13
237	2023-01-01	13:19:36	1	3	Astoria	23	2.5	Coffee	Drip coffee	Our Old Time Diner Blend Rg	2.5	1	Jan	7	Sun	13
238	2023-01-01	13:19:56	2	8	Hell's Kitchen	31	2.2	Coffee	Gourmet brewed coffee	Ethiopia Sm	4.4	1	Jan	7	Sun	13
239	2023-01-01	13:20:51	2	3	Astoria	35	3.1	Coffee	Premium brewed coffee	Jamaican Coffee River Rg	6.2	1	Jan	7	Sun	13
240	2023-01-01	13:21:23	2	3	Astoria	38	3.75	Coffee	Barista Espresso	Latte	7.5	1	Jan	7	Sun	13
241	2023-01-01	13:22:11	1	5	Lower Manhattan	23	2.5	Coffee	Drip coffee	Our Old Time Diner Blend Rg	2.5	1	Jan	7	Sun	13
242	2023-01-01	13:22:45	2	3	Astoria	46	2.5	Tea	Brewed Green tea	Serenity Green Tea Rg	5	1	Jan	7	Sun	13
243	2023-01-01	13:23:54	2	3	Astoria	58	3.5	Drinking Chocolate	Hot chocolate	Dark chocolate Rg	7	1	Jan	7	Sun	13
244	2023-01-01	13:24:29	2	5	Lower Manhattan	60	3.75	Drinking Chocolate	Hot chocolate	Sustainably Grown Organic Rg	7.5	1	Jan	7	Sun	13
245	2023-01-01	13:30:49	2	5	Lower Manhattan	31	2.2	Coffee	Gourmet brewed coffee	Ethiopia Sm	4.4	1	Jan	7	Sun	13
246	2023-01-01	13:32:07	2	5	Lower Manhattan	25	2.2	Coffee	Organic brewed coffee	Brazilian Sm	4.4	1	Jan	7	Sun	13
247	2023-01-01	13:32:34	1	5	Lower Manhattan	87	3	Coffee	Barista Espresso	Ouro Brasileiro shot	3	1	Jan	7	Sun	13
248	2023-01-01	13:34:12	2	3	Astoria	28	2	Coffee	Gourmet brewed coffee	Columbian Medium Roast Sm	4	1	Jan	7	Sun	13
249	2023-01-01	13:38:09	1	8	Hell's Kitchen	27	3.5	Coffee	Organic brewed coffee	Brazilian Lg	3.5	1	Jan	7	Sun	13
250	2023-01-01	13:38:11	2	8	Hell's Kitchen	40	3.75	Coffee	Barista Espresso	Cappuccino	7.5	1	Jan	7	Sun	13
251	2023-01-01	13:39:41	1	5	Lower Manhattan	51	3	Tea	Brewed Black tea	Earl Grey Lg	3	1	Jan	7	Sun	13
252	2023-01-01	13:40:47	2	3	Astoria	54	2.5	Tea	Brewed Chai tea	Morning Sunrise Chai Rg	5	1	Jan	7	Sun	13
253	2023-01-01	13:41:09	2	3	Astoria	42	2.5	Tea	Brewed herbal tea	Lemon Grass Rg	5	1	Jan	7	Sun	13
254	2023-01-01	13:42:10	1	3	Astoria	43	3	Tea	Brewed herbal tea	Lemon Grass Lg	3	1	Jan	7	Sun	13
255	2023-01-01	13:42:49	1	5	Lower Manhattan	36	3.75	Coffee	Premium brewed coffee	Jamaican Coffee River Lg	3.75	1	Jan	7	Sun	13
256	2023-01-01	13:42:58	1	5	Lower Manhattan	52	2.5	Tea	Brewed Chai tea	Traditional Blend Chai Rg	2.5	1	Jan	7	Sun	13
257	2023-01-01	13:42:58	1	5	Lower Manhattan	72	3.25	Bakery	Scone	Ginger Scone	3.25	1	Jan	7	Sun	13
258	2023-01-01	13:43:18	2	3	Astoria	54	2.5	Tea	Brewed Chai tea	Morning Sunrise Chai Rg	5	1	Jan	7	Sun	13
259	2023-01-01	13:43:18	1	3	Astoria	69	3.25	Bakery	Biscotti	Hazelnut Biscotti	3.25	1	Jan	7	Sun	13
260	2023-01-01	13:43:41	2	5	Lower Manhattan	25	2.2	Coffee	Organic brewed coffee	Brazilian Sm	4.4	1	Jan	7	Sun	13
261	2023-01-01	13:44:26	1	3	Astoria	57	3.1	Tea	Brewed Chai tea	Spicy Eye Opener Chai Lg	3.1	1	Jan	7	Sun	13
262	2023-01-01	13:47:51	1	8	Hell's Kitchen	40	3.75	Coffee	Barista Espresso	Cappuccino	3.75	1	Jan	7	Sun	13
263	2023-01-01	13:49:03	2	8	Hell's Kitchen	22	2	Coffee	Drip coffee	Our Old Time Diner Blend Sm	4	1	Jan	7	Sun	13
264	2023-01-01	13:50:09	1	5	Lower Manhattan	53	3	Tea	Brewed Chai tea	Traditional Blend Chai Lg	3	1	Jan	7	Sun	13
265	2023-01-01	13:50:47	2	8	Hell's Kitchen	54	2.5	Tea	Brewed Chai tea	Morning Sunrise Chai Rg	5	1	Jan	7	Sun	13
266	2023-01-01	13:51:56	2	8	Hell's Kitchen	32	3	Coffee	Gourmet brewed coffee	Ethiopia Rg	6	1	Jan	7	Sun	13
267	2023-01-01	13:53:04	2	3	Astoria	38	3.75	Coffee	Barista Espresso	Latte	7.5	1	Jan	7	Sun	13
268	2023-01-01	13:53:31	1	8	Hell's Kitchen	33	3.5	Coffee	Gourmet brewed coffee	Ethiopia Lg	3.5	1	Jan	7	Sun	13
269	2023-01-01	13:54:18	2	8	Hell's Kitchen	22	2	Coffee	Drip coffee	Our Old Time Diner Blend Sm	4	1	Jan	7	Sun	13
270	2023-01-01	13:55:04	1	5	Lower Manhattan	42	2.5	Tea	Brewed herbal tea	Lemon Grass Rg	2.5	1	Jan	7	Sun	13
271	2023-01-01	13:55:50	2	8	Hell's Kitchen	45	3	Tea	Brewed herbal tea	Peppermint Lg	6	1	Jan	7	Sun	13
272	2023-01-01	13:56:15	2	8	Hell's Kitchen	48	2.5	Tea	Brewed Black tea	English Breakfast Rg	5	1	Jan	7	Sun	13
273	2023-01-01	13:56:24	1	8	Hell's Kitchen	53	3	Tea	Brewed Chai tea	Traditional Blend Chai Lg	3	1	Jan	7	Sun	13
274	2023-01-01	13:57:34	2	5	Lower Manhattan	27	3.5	Coffee	Organic brewed coffee	Brazilian Lg	7	1	Jan	7	Sun	13
275	2023-01-01	13:57:34	1	5	Lower Manhattan	71	3.75	Bakery	Pastry	Chocolate Croissant	3.75	1	Jan	7	Sun	13
276	2023-01-01	13:58:10	2	3	Astoria	46	2.5	Tea	Brewed Green tea	Serenity Green Tea Rg	5	1	Jan	7	Sun	13
277	2023-01-01	13:58:11	1	5	Lower Manhattan	34	2.45	Coffee	Premium brewed coffee	Jamaican Coffee River Sm	2.45	1	Jan	7	Sun	13
278	2023-01-01	13:59:58	2	5	Lower Manhattan	39	4.25	Coffee	Barista Espresso	Latte Rg	8.5	1	Jan	7	Sun	13
279	2023-01-01	14:03:34	2	5	Lower Manhattan	25	2.2	Coffee	Organic brewed coffee	Brazilian Sm	4.4	1	Jan	7	Sun	14
280	2023-01-01	14:03:34	1	5	Lower Manhattan	69	3.25	Bakery	Biscotti	Hazelnut Biscotti	3.25	1	Jan	7	Sun	14
281	2023-01-01	14:03:41	1	3	Astoria	32	3	Coffee	Gourmet brewed coffee	Ethiopia Rg	3	1	Jan	7	Sun	14
282	2023-01-01	14:07:12	2	3	Astoria	41	4.25	Coffee	Barista Espresso	Cappuccino Lg	8.5	1	Jan	7	Sun	14
283	2023-01-01	14:07:56	1	3	Astoria	23	2.5	Coffee	Drip coffee	Our Old Time Diner Blend Rg	2.5	1	Jan	7	Sun	14
284	2023-01-01	14:08:03	1	8	Hell's Kitchen	24	3	Coffee	Drip coffee	Our Old Time Diner Blend Lg	3	1	Jan	7	Sun	14
285	2023-01-01	14:08:03	1	8	Hell's Kitchen	71	3.75	Bakery	Pastry	Chocolate Croissant	3.75	1	Jan	7	Sun	14
286	2023-01-01	14:11:14	2	8	Hell's Kitchen	60	3.75	Drinking Chocolate	Hot chocolate	Sustainably Grown Organic Rg	7.5	1	Jan	7	Sun	14
287	2023-01-01	14:13:28	2	5	Lower Manhattan	57	3.1	Tea	Brewed Chai tea	Spicy Eye Opener Chai Lg	6.2	1	Jan	7	Sun	14
288	2023-01-01	14:19:57	2	5	Lower Manhattan	23	2.5	Coffee	Drip coffee	Our Old Time Diner Blend Rg	5	1	Jan	7	Sun	14
289	2023-01-01	14:20:06	2	3	Astoria	35	3.1	Coffee	Premium brewed coffee	Jamaican Coffee River Rg	6.2	1	Jan	7	Sun	14
290	2023-01-01	14:20:08	2	3	Astoria	42	2.5	Tea	Brewed herbal tea	Lemon Grass Rg	5	1	Jan	7	Sun	14
291	2023-01-01	14:22:01	2	8	Hell's Kitchen	49	3	Tea	Brewed Black tea	English Breakfast Lg	6	1	Jan	7	Sun	14
292	2023-01-01	14:22:38	2	5	Lower Manhattan	39	4.25	Coffee	Barista Espresso	Latte Rg	8.5	1	Jan	7	Sun	14
293	2023-01-01	14:23:28	1	8	Hell's Kitchen	55	4	Tea	Brewed Chai tea	Morning Sunrise Chai Lg	4	1	Jan	7	Sun	14
294	2023-01-01	14:23:28	1	8	Hell's Kitchen	71	3.75	Bakery	Pastry	Chocolate Croissant	3.75	1	Jan	7	Sun	14
295	2023-01-01	14:24:55	2	3	Astoria	41	4.25	Coffee	Barista Espresso	Cappuccino Lg	8.5	1	Jan	7	Sun	14
296	2023-01-01	14:24:55	1	3	Astoria	79	3.75	Bakery	Scone	Jumbo Savory Scone	3.75	1	Jan	7	Sun	14
297	2023-01-01	14:25:32	2	3	Astoria	58	3.5	Drinking Chocolate	Hot chocolate	Dark chocolate Rg	7	1	Jan	7	Sun	14
298	2023-01-01	14:25:39	2	5	Lower Manhattan	24	3	Coffee	Drip coffee	Our Old Time Diner Blend Lg	6	1	Jan	7	Sun	14
299	2023-01-01	14:26:36	1	8	Hell's Kitchen	61	4.75	Drinking Chocolate	Hot chocolate	Sustainably Grown Organic Lg	4.75	1	Jan	7	Sun	14
300	2023-01-01	14:29:05	2	5	Lower Manhattan	45	3	Tea	Brewed herbal tea	Peppermint Lg	6	1	Jan	7	Sun	14
301	2023-01-01	14:29:50	2	5	Lower Manhattan	49	3	Tea	Brewed Black tea	English Breakfast Lg	6	1	Jan	7	Sun	14
302	2023-01-01	14:29:50	1	5	Lower Manhattan	78	4.5	Bakery	Scone	Scottish Cream Scone	4.5	1	Jan	7	Sun	14
303	2023-01-01	14:30:51	1	8	Hell's Kitchen	48	2.5	Tea	Brewed Black tea	English Breakfast Rg	2.5	1	Jan	7	Sun	14
304	2023-01-01	14:30:58	1	5	Lower Manhattan	57	3.1	Tea	Brewed Chai tea	Spicy Eye Opener Chai Lg	3.1	1	Jan	7	Sun	14
305	2023-01-01	14:31:26	1	5	Lower Manhattan	42	2.5	Tea	Brewed herbal tea	Lemon Grass Rg	2.5	1	Jan	7	Sun	14
306	2023-01-01	14:32:20	2	8	Hell's Kitchen	30	3	Coffee	Gourmet brewed coffee	Columbian Medium Roast Lg	6	1	Jan	7	Sun	14
307	2023-01-01	14:32:42	2	5	Lower Manhattan	41	4.25	Coffee	Barista Espresso	Cappuccino Lg	8.5	1	Jan	7	Sun	14
308	2023-01-01	14:32:54	2	8	Hell's Kitchen	39	4.25	Coffee	Barista Espresso	Latte Rg	8.5	1	Jan	7	Sun	14
309	2023-01-01	14:35:47	1	3	Astoria	55	4	Tea	Brewed Chai tea	Morning Sunrise Chai Lg	4	1	Jan	7	Sun	14
310	2023-01-01	14:36:23	2	3	Astoria	30	3	Coffee	Gourmet brewed coffee	Columbian Medium Roast Lg	6	1	Jan	7	Sun	14
311	2023-01-01	14:36:35	1	5	Lower Manhattan	57	3.1	Tea	Brewed Chai tea	Spicy Eye Opener Chai Lg	3.1	1	Jan	7	Sun	14
312	2023-01-01	14:37:48	1	5	Lower Manhattan	44	2.5	Tea	Brewed herbal tea	Peppermint Rg	2.5	1	Jan	7	Sun	14
313	2023-01-01	14:39:06	1	5	Lower Manhattan	87	3	Coffee	Barista Espresso	Ouro Brasileiro shot	3	1	Jan	7	Sun	14
314	2023-01-01	14:39:48	2	8	Hell's Kitchen	34	2.45	Coffee	Premium brewed coffee	Jamaican Coffee River Sm	4.9	1	Jan	7	Sun	14
315	2023-01-01	14:42:39	2	5	Lower Manhattan	61	4.75	Drinking Chocolate	Hot chocolate	Sustainably Grown Organic Lg	9.5	1	Jan	7	Sun	14
316	2023-01-01	14:43:13	2	3	Astoria	50	2.5	Tea	Brewed Black tea	Earl Grey Rg	5	1	Jan	7	Sun	14
317	2023-01-01	14:45:31	1	3	Astoria	47	3	Tea	Brewed Green tea	Serenity Green Tea Lg	3	1	Jan	7	Sun	14
318	2023-01-01	14:46:09	1	8	Hell's Kitchen	48	2.5	Tea	Brewed Black tea	English Breakfast Rg	2.5	1	Jan	7	Sun	14
319	2023-01-01	14:47:29	1	8	Hell's Kitchen	24	3	Coffee	Drip coffee	Our Old Time Diner Blend Lg	3	1	Jan	7	Sun	14
320	2023-01-01	14:47:29	1	8	Hell's Kitchen	75	3.5	Bakery	Pastry	Croissant	3.5	1	Jan	7	Sun	14
321	2023-01-01	14:49:49	2	8	Hell's Kitchen	51	3	Tea	Brewed Black tea	Earl Grey Lg	6	1	Jan	7	Sun	14
322	2023-01-01	14:51:19	2	5	Lower Manhattan	43	3	Tea	Brewed herbal tea	Lemon Grass Lg	6	1	Jan	7	Sun	14
323	2023-01-01	14:55:34	2	3	Astoria	34	2.45	Coffee	Premium brewed coffee	Jamaican Coffee River Sm	4.9	1	Jan	7	Sun	14
324	2023-01-01	14:58:07	2	8	Hell's Kitchen	30	3	Coffee	Gourmet brewed coffee	Columbian Medium Roast Lg	6	1	Jan	7	Sun	14
325	2023-01-01	14:58:35	1	3	Astoria	43	3	Tea	Brewed herbal tea	Lemon Grass Lg	3	1	Jan	7	Sun	14
326	2023-01-01	15:02:04	2	3	Astoria	39	4.25	Coffee	Barista Espresso	Latte Rg	8.5	1	Jan	7	Sun	15
327	2023-01-01	15:02:28	1	8	Hell's Kitchen	38	3.75	Coffee	Barista Espresso	Latte	3.75	1	Jan	7	Sun	15
328	2023-01-01	15:06:27	2	5	Lower Manhattan	25	2.2	Coffee	Organic brewed coffee	Brazilian Sm	4.4	1	Jan	7	Sun	15
329	2023-01-01	15:08:28	2	3	Astoria	43	3	Tea	Brewed herbal tea	Lemon Grass Lg	6	1	Jan	7	Sun	15
330	2023-01-01	15:09:37	1	3	Astoria	22	2	Coffee	Drip coffee	Our Old Time Diner Blend Sm	2	1	Jan	7	Sun	15
331	2023-01-01	15:09:54	1	8	Hell's Kitchen	61	4.75	Drinking Chocolate	Hot chocolate	Sustainably Grown Organic Lg	4.75	1	Jan	7	Sun	15
332	2023-01-01	15:10:10	1	5	Lower Manhattan	40	3.75	Coffee	Barista Espresso	Cappuccino	3.75	1	Jan	7	Sun	15
333	2023-01-01	15:10:10	1	5	Lower Manhattan	75	3.5	Bakery	Pastry	Croissant	3.5	1	Jan	7	Sun	15
334	2023-01-01	15:12:22	1	3	Astoria	24	3	Coffee	Drip coffee	Our Old Time Diner Blend Lg	3	1	Jan	7	Sun	15
335	2023-01-01	15:12:54	2	3	Astoria	52	2.5	Tea	Brewed Chai tea	Traditional Blend Chai Rg	5	1	Jan	7	Sun	15
336	2023-01-01	15:14:19	2	3	Astoria	26	3	Coffee	Organic brewed coffee	Brazilian Rg	6	1	Jan	7	Sun	15
337	2023-01-01	15:16:37	2	5	Lower Manhattan	38	3.75	Coffee	Barista Espresso	Latte	7.5	1	Jan	7	Sun	15
338	2023-01-01	15:18:56	1	3	Astoria	61	4.75	Drinking Chocolate	Hot chocolate	Sustainably Grown Organic Lg	4.75	1	Jan	7	Sun	15
339	2023-01-01	15:19:34	1	3	Astoria	29	2.5	Coffee	Gourmet brewed coffee	Columbian Medium Roast Rg	2.5	1	Jan	7	Sun	15
340	2023-01-01	15:21:05	2	8	Hell's Kitchen	30	3	Coffee	Gourmet brewed coffee	Columbian Medium Roast Lg	6	1	Jan	7	Sun	15
341	2023-01-01	15:22:11	2	3	Astoria	39	4.25	Coffee	Barista Espresso	Latte Rg	8.5	1	Jan	7	Sun	15
342	2023-01-01	15:24:01	1	8	Hell's Kitchen	26	3	Coffee	Organic brewed coffee	Brazilian Rg	3	1	Jan	7	Sun	15
343	2023-01-01	15:25:09	2	5	Lower Manhattan	50	2.5	Tea	Brewed Black tea	Earl Grey Rg	5	1	Jan	7	Sun	15
344	2023-01-01	15:27:11	2	3	Astoria	58	3.5	Drinking Chocolate	Hot chocolate	Dark chocolate Rg	7	1	Jan	7	Sun	15
345	2023-01-01	15:28:29	1	3	Astoria	58	3.5	Drinking Chocolate	Hot chocolate	Dark chocolate Rg	3.5	1	Jan	7	Sun	15
346	2023-01-01	15:28:54	1	5	Lower Manhattan	43	3	Tea	Brewed herbal tea	Lemon Grass Lg	3	1	Jan	7	Sun	15
347	2023-01-01	15:29:24	1	3	Astoria	57	3.1	Tea	Brewed Chai tea	Spicy Eye Opener Chai Lg	3.1	1	Jan	7	Sun	15
348	2023-01-01	15:29:24	1	3	Astoria	70	3.25	Bakery	Scone	Cranberry Scone	3.25	1	Jan	7	Sun	15
349	2023-01-01	15:30:16	1	3	Astoria	43	3	Tea	Brewed herbal tea	Lemon Grass Lg	3	1	Jan	7	Sun	15
350	2023-01-01	15:30:27	2	3	Astoria	31	2.2	Coffee	Gourmet brewed coffee	Ethiopia Sm	4.4	1	Jan	7	Sun	15
351	2023-01-01	15:30:58	1	5	Lower Manhattan	34	2.45	Coffee	Premium brewed coffee	Jamaican Coffee River Sm	2.45	1	Jan	7	Sun	15
352	2023-01-01	15:30:58	2	8	Hell's Kitchen	29	2.5	Coffee	Gourmet brewed coffee	Columbian Medium Roast Rg	5	1	Jan	7	Sun	15
353	2023-01-01	15:33:36	2	5	Lower Manhattan	28	2	Coffee	Gourmet brewed coffee	Columbian Medium Roast Sm	4	1	Jan	7	Sun	15
354	2023-01-01	15:33:36	1	5	Lower Manhattan	74	3.5	Bakery	Biscotti	Ginger Biscotti	3.5	1	Jan	7	Sun	15
355	2023-01-01	15:34:10	2	3	Astoria	41	4.25	Coffee	Barista Espresso	Cappuccino Lg	8.5	1	Jan	7	Sun	15
356	2023-01-01	15:34:10	1	3	Astoria	76	3.5	Bakery	Biscotti	Chocolate Chip Biscotti	3.5	1	Jan	7	Sun	15
357	2023-01-01	15:36:59	2	5	Lower Manhattan	37	3	Coffee	Barista Espresso	Espresso shot	6	1	Jan	7	Sun	15
358	2023-01-01	15:39:44	1	8	Hell's Kitchen	44	2.5	Tea	Brewed herbal tea	Peppermint Rg	2.5	1	Jan	7	Sun	15
359	2023-01-01	15:42:20	1	3	Astoria	36	3.75	Coffee	Premium brewed coffee	Jamaican Coffee River Lg	3.75	1	Jan	7	Sun	15
360	2023-01-01	15:45:16	2	3	Astoria	46	2.5	Tea	Brewed Green tea	Serenity Green Tea Rg	5	1	Jan	7	Sun	15
361	2023-01-01	15:46:34	2	5	Lower Manhattan	40	3.75	Coffee	Barista Espresso	Cappuccino	7.5	1	Jan	7	Sun	15
362	2023-01-01	15:51:15	2	8	Hell's Kitchen	35	3.1	Coffee	Premium brewed coffee	Jamaican Coffee River Rg	6.2	1	Jan	7	Sun	15
363	2023-01-01	15:52:23	2	5	Lower Manhattan	39	4.25	Coffee	Barista Espresso	Latte Rg	8.5	1	Jan	7	Sun	15
364	2023-01-01	15:52:23	1	5	Lower Manhattan	69	3.25	Bakery	Biscotti	Hazelnut Biscotti	3.25	1	Jan	7	Sun	15
365	2023-01-01	15:53:55	2	5	Lower Manhattan	33	3.5	Coffee	Gourmet brewed coffee	Ethiopia Lg	7	1	Jan	7	Sun	15
366	2023-01-01	15:55:45	1	8	Hell's Kitchen	24	3	Coffee	Drip coffee	Our Old Time Diner Blend Lg	3	1	Jan	7	Sun	15
367	2023-01-01	15:55:50	2	3	Astoria	31	2.2	Coffee	Gourmet brewed coffee	Ethiopia Sm	4.4	1	Jan	7	Sun	15
368	2023-01-01	15:58:55	1	8	Hell's Kitchen	48	2.5	Tea	Brewed Black tea	English Breakfast Rg	2.5	1	Jan	7	Sun	15
369	2023-01-01	16:00:23	1	8	Hell's Kitchen	38	3.75	Coffee	Barista Espresso	Latte	3.75	1	Jan	7	Sun	16
370	2023-01-01	16:02:07	1	8	Hell's Kitchen	41	4.25	Coffee	Barista Espresso	Cappuccino Lg	4.25	1	Jan	7	Sun	16
371	2023-01-01	16:03:30	2	3	Astoria	34	2.45	Coffee	Premium brewed coffee	Jamaican Coffee River Sm	4.9	1	Jan	7	Sun	16
372	2023-01-01	16:03:54	1	8	Hell's Kitchen	46	2.5	Tea	Brewed Green tea	Serenity Green Tea Rg	2.5	1	Jan	7	Sun	16
373	2023-01-01	16:04:10	2	3	Astoria	42	2.5	Tea	Brewed herbal tea	Lemon Grass Rg	5	1	Jan	7	Sun	16
374	2023-01-01	16:06:04	2	3	Astoria	23	2.5	Coffee	Drip coffee	Our Old Time Diner Blend Rg	5	1	Jan	7	Sun	16
375	2023-01-01	16:07:20	2	3	Astoria	23	2.5	Coffee	Drip coffee	Our Old Time Diner Blend Rg	5	1	Jan	7	Sun	16
376	2023-01-01	16:08:59	2	3	Astoria	42	2.5	Tea	Brewed herbal tea	Lemon Grass Rg	5	1	Jan	7	Sun	16
377	2023-01-01	16:10:37	2	3	Astoria	42	2.5	Tea	Brewed herbal tea	Lemon Grass Rg	5	1	Jan	7	Sun	16
378	2023-01-01	16:12:00	1	8	Hell's Kitchen	87	3	Coffee	Barista Espresso	Ouro Brasileiro shot	3	1	Jan	7	Sun	16
379	2023-01-01	16:17:06	2	3	Astoria	34	2.45	Coffee	Premium brewed coffee	Jamaican Coffee River Sm	4.9	1	Jan	7	Sun	16
380	2023-01-01	16:17:52	2	3	Astoria	29	2.5	Coffee	Gourmet brewed coffee	Columbian Medium Roast Rg	5	1	Jan	7	Sun	16
381	2023-01-01	16:19:00	2	8	Hell's Kitchen	29	2.5	Coffee	Gourmet brewed coffee	Columbian Medium Roast Rg	5	1	Jan	7	Sun	16
382	2023-01-01	16:19:17	1	3	Astoria	56	2.55	Tea	Brewed Chai tea	Spicy Eye Opener Chai Rg	2.55	1	Jan	7	Sun	16
383	2023-01-01	16:19:26	2	5	Lower Manhattan	40	3.75	Coffee	Barista Espresso	Cappuccino	7.5	1	Jan	7	Sun	16
384	2023-01-01	16:20:07	2	3	Astoria	36	3.75	Coffee	Premium brewed coffee	Jamaican Coffee River Lg	7.5	1	Jan	7	Sun	16
385	2023-01-01	16:22:07	1	5	Lower Manhattan	22	2	Coffee	Drip coffee	Our Old Time Diner Blend Sm	2	1	Jan	7	Sun	16
386	2023-01-01	16:22:38	1	3	Astoria	22	2	Coffee	Drip coffee	Our Old Time Diner Blend Sm	2	1	Jan	7	Sun	16
387	2023-01-01	16:25:28	1	3	Astoria	44	2.5	Tea	Brewed herbal tea	Peppermint Rg	2.5	1	Jan	7	Sun	16
388	2023-01-01	16:27:42	1	5	Lower Manhattan	56	2.55	Tea	Brewed Chai tea	Spicy Eye Opener Chai Rg	2.55	1	Jan	7	Sun	16
389	2023-01-01	16:28:00	2	8	Hell's Kitchen	53	3	Tea	Brewed Chai tea	Traditional Blend Chai Lg	6	1	Jan	7	Sun	16
390	2023-01-01	16:28:57	1	5	Lower Manhattan	42	2.5	Tea	Brewed herbal tea	Lemon Grass Rg	2.5	1	Jan	7	Sun	16
391	2023-01-01	16:29:36	2	3	Astoria	27	3.5	Coffee	Organic brewed coffee	Brazilian Lg	7	1	Jan	7	Sun	16
392	2023-01-01	16:30:12	1	3	Astoria	40	3.75	Coffee	Barista Espresso	Cappuccino	3.75	1	Jan	7	Sun	16
393	2023-01-01	16:33:35	1	3	Astoria	35	3.1	Coffee	Premium brewed coffee	Jamaican Coffee River Rg	3.1	1	Jan	7	Sun	16
394	2023-01-01	16:35:11	1	5	Lower Manhattan	28	2	Coffee	Gourmet brewed coffee	Columbian Medium Roast Sm	2	1	Jan	7	Sun	16
395	2023-01-01	16:39:24	1	3	Astoria	36	3.75	Coffee	Premium brewed coffee	Jamaican Coffee River Lg	3.75	1	Jan	7	Sun	16
396	2023-01-01	16:39:27	1	8	Hell's Kitchen	58	3.5	Drinking Chocolate	Hot chocolate	Dark chocolate Rg	3.5	1	Jan	7	Sun	16
397	2023-01-01	16:40:18	1	3	Astoria	33	3.5	Coffee	Gourmet brewed coffee	Ethiopia Lg	3.5	1	Jan	7	Sun	16
398	2023-01-01	16:40:19	1	5	Lower Manhattan	46	2.5	Tea	Brewed Green tea	Serenity Green Tea Rg	2.5	1	Jan	7	Sun	16
399	2023-01-01	16:41:51	1	5	Lower Manhattan	23	2.5	Coffee	Drip coffee	Our Old Time Diner Blend Rg	2.5	1	Jan	7	Sun	16
400	2023-01-01	16:43:33	2	8	Hell's Kitchen	50	2.5	Tea	Brewed Black tea	Earl Grey Rg	5	1	Jan	7	Sun	16
401	2023-01-01	16:44:46	2	3	Astoria	54	2.5	Tea	Brewed Chai tea	Morning Sunrise Chai Rg	5	1	Jan	7	Sun	16
402	2023-01-01	16:47:05	1	5	Lower Manhattan	44	2.5	Tea	Brewed herbal tea	Peppermint Rg	2.5	1	Jan	7	Sun	16
403	2023-01-01	16:47:05	1	5	Lower Manhattan	72	3.25	Bakery	Scone	Ginger Scone	3.25	1	Jan	7	Sun	16
404	2023-01-01	16:48:31	2	5	Lower Manhattan	44	2.5	Tea	Brewed herbal tea	Peppermint Rg	5	1	Jan	7	Sun	16
405	2023-01-01	16:49:19	1	5	Lower Manhattan	53	3	Tea	Brewed Chai tea	Traditional Blend Chai Lg	3	1	Jan	7	Sun	16
406	2023-01-01	16:49:19	1	5	Lower Manhattan	71	3.75	Bakery	Pastry	Chocolate Croissant	3.75	1	Jan	7	Sun	16
407	2023-01-01	16:49:38	1	3	Astoria	52	2.5	Tea	Brewed Chai tea	Traditional Blend Chai Rg	2.5	1	Jan	7	Sun	16
408	2023-01-01	16:52:13	2	8	Hell's Kitchen	42	2.5	Tea	Brewed herbal tea	Lemon Grass Rg	5	1	Jan	7	Sun	16
409	2023-01-01	16:52:51	1	5	Lower Manhattan	50	2.5	Tea	Brewed Black tea	Earl Grey Rg	2.5	1	Jan	7	Sun	16
410	2023-01-01	16:56:48	1	3	Astoria	28	2	Coffee	Gourmet brewed coffee	Columbian Medium Roast Sm	2	1	Jan	7	Sun	16
411	2023-01-01	16:58:42	1	3	Astoria	58	3.5	Drinking Chocolate	Hot chocolate	Dark chocolate Rg	3.5	1	Jan	7	Sun	16
412	2023-01-01	16:58:42	1	3	Astoria	69	3.25	Bakery	Biscotti	Hazelnut Biscotti	3.25	1	Jan	7	Sun	16
413	2023-01-01	17:01:03	2	5	Lower Manhattan	36	3.75	Coffee	Premium brewed coffee	Jamaican Coffee River Lg	7.5	1	Jan	7	Sun	17
414	2023-01-01	17:01:31	2	8	Hell's Kitchen	50	2.5	Tea	Brewed Black tea	Earl Grey Rg	5	1	Jan	7	Sun	17
415	2023-01-01	17:03:21	1	3	Astoria	50	2.5	Tea	Brewed Black tea	Earl Grey Rg	2.5	1	Jan	7	Sun	17
416	2023-01-01	17:05:44	2	3	Astoria	36	3.75	Coffee	Premium brewed coffee	Jamaican Coffee River Lg	7.5	1	Jan	7	Sun	17
417	2023-01-01	17:09:18	2	8	Hell's Kitchen	47	3	Tea	Brewed Green tea	Serenity Green Tea Lg	6	1	Jan	7	Sun	17
418	2023-01-01	17:10:34	1	3	Astoria	27	3.5	Coffee	Organic brewed coffee	Brazilian Lg	3.5	1	Jan	7	Sun	17
419	2023-01-01	17:10:35	1	3	Astoria	59	4.5	Drinking Chocolate	Hot chocolate	Dark chocolate Lg	4.5	1	Jan	7	Sun	17
420	2023-01-01	17:11:58	2	8	Hell's Kitchen	36	3.75	Coffee	Premium brewed coffee	Jamaican Coffee River Lg	7.5	1	Jan	7	Sun	17
421	2023-01-01	17:13:17	2	5	Lower Manhattan	31	2.2	Coffee	Gourmet brewed coffee	Ethiopia Sm	4.4	1	Jan	7	Sun	17
422	2023-01-01	17:16:17	1	8	Hell's Kitchen	35	3.1	Coffee	Premium brewed coffee	Jamaican Coffee River Rg	3.1	1	Jan	7	Sun	17
423	2023-01-01	17:17:19	2	8	Hell's Kitchen	55	4	Tea	Brewed Chai tea	Morning Sunrise Chai Lg	8	1	Jan	7	Sun	17
424	2023-01-01	17:17:22	1	8	Hell's Kitchen	31	2.2	Coffee	Gourmet brewed coffee	Ethiopia Sm	2.2	1	Jan	7	Sun	17
425	2023-01-01	17:18:36	1	3	Astoria	29	2.5	Coffee	Gourmet brewed coffee	Columbian Medium Roast Rg	2.5	1	Jan	7	Sun	17
426	2023-01-01	17:19:08	2	5	Lower Manhattan	34	2.45	Coffee	Premium brewed coffee	Jamaican Coffee River Sm	4.9	1	Jan	7	Sun	17
427	2023-01-01	17:19:08	1	5	Lower Manhattan	75	3.5	Bakery	Pastry	Croissant	3.5	1	Jan	7	Sun	17
428	2023-01-01	17:19:11	2	8	Hell's Kitchen	39	4.25	Coffee	Barista Espresso	Latte Rg	8.5	1	Jan	7	Sun	17
429	2023-01-01	17:19:28	2	8	Hell's Kitchen	28	2	Coffee	Gourmet brewed coffee	Columbian Medium Roast Sm	4	1	Jan	7	Sun	17
430	2023-01-01	17:19:49	2	8	Hell's Kitchen	87	3	Coffee	Barista Espresso	Ouro Brasileiro shot	6	1	Jan	7	Sun	17
431	2023-01-01	17:19:49	1	8	Hell's Kitchen	78	4.5	Bakery	Scone	Scottish Cream Scone	4.5	1	Jan	7	Sun	17
432	2023-01-01	17:20:02	2	8	Hell's Kitchen	46	2.5	Tea	Brewed Green tea	Serenity Green Tea Rg	5	1	Jan	7	Sun	17
433	2023-01-01	17:20:02	1	8	Hell's Kitchen	77	3	Bakery	Scone	Oatmeal Scone	3	1	Jan	7	Sun	17
434	2023-01-01	17:22:36	1	3	Astoria	36	3.75	Coffee	Premium brewed coffee	Jamaican Coffee River Lg	3.75	1	Jan	7	Sun	17
435	2023-01-01	17:23:03	1	5	Lower Manhattan	48	2.5	Tea	Brewed Black tea	English Breakfast Rg	2.5	1	Jan	7	Sun	17
436	2023-01-01	17:23:04	1	3	Astoria	41	4.25	Coffee	Barista Espresso	Cappuccino Lg	4.25	1	Jan	7	Sun	17
437	2023-01-01	17:25:45	2	3	Astoria	58	3.5	Drinking Chocolate	Hot chocolate	Dark chocolate Rg	7	1	Jan	7	Sun	17
438	2023-01-01	17:26:15	1	8	Hell's Kitchen	35	3.1	Coffee	Premium brewed coffee	Jamaican Coffee River Rg	3.1	1	Jan	7	Sun	17
439	2023-01-01	17:26:15	1	8	Hell's Kitchen	76	3.5	Bakery	Biscotti	Chocolate Chip Biscotti	3.5	1	Jan	7	Sun	17
440	2023-01-01	17:28:42	1	5	Lower Manhattan	37	3	Coffee	Barista Espresso	Espresso shot	3	1	Jan	7	Sun	17
441	2023-01-01	17:28:42	1	5	Lower Manhattan	70	3.25	Bakery	Scone	Cranberry Scone	3.25	1	Jan	7	Sun	17
442	2023-01-01	17:29:25	1	3	Astoria	46	2.5	Tea	Brewed Green tea	Serenity Green Tea Rg	2.5	1	Jan	7	Sun	17
443	2023-01-01	17:29:25	1	3	Astoria	75	3.5	Bakery	Pastry	Croissant	3.5	1	Jan	7	Sun	17
444	2023-01-01	17:34:47	2	8	Hell's Kitchen	54	2.5	Tea	Brewed Chai tea	Morning Sunrise Chai Rg	5	1	Jan	7	Sun	17
445	2023-01-01	17:35:26	1	3	Astoria	47	3	Tea	Brewed Green tea	Serenity Green Tea Lg	3	1	Jan	7	Sun	17
446	2023-01-01	17:35:26	1	3	Astoria	69	3.25	Bakery	Biscotti	Hazelnut Biscotti	3.25	1	Jan	7	Sun	17
447	2023-01-01	17:37:26	1	8	Hell's Kitchen	42	2.5	Tea	Brewed herbal tea	Lemon Grass Rg	2.5	1	Jan	7	Sun	17
448	2023-01-01	17:40:50	1	3	Astoria	55	4	Tea	Brewed Chai tea	Morning Sunrise Chai Lg	4	1	Jan	7	Sun	17
449	2023-01-01	17:41:55	2	3	Astoria	55	4	Tea	Brewed Chai tea	Morning Sunrise Chai Lg	8	1	Jan	7	Sun	17
450	2023-01-01	17:41:55	1	3	Astoria	71	3.75	Bakery	Pastry	Chocolate Croissant	3.75	1	Jan	7	Sun	17
451	2023-01-01	17:43:49	2	8	Hell's Kitchen	52	2.5	Tea	Brewed Chai tea	Traditional Blend Chai Rg	5	1	Jan	7	Sun	17
452	2023-01-01	17:44:28	2	3	Astoria	27	3.5	Coffee	Organic brewed coffee	Brazilian Lg	7	1	Jan	7	Sun	17
453	2023-01-01	17:44:28	1	3	Astoria	74	3.5	Bakery	Biscotti	Ginger Biscotti	3.5	1	Jan	7	Sun	17
454	2023-01-01	17:44:48	1	8	Hell's Kitchen	34	2.45	Coffee	Premium brewed coffee	Jamaican Coffee River Sm	2.45	1	Jan	7	Sun	17
455	2023-01-01	17:45:21	1	8	Hell's Kitchen	27	3.5	Coffee	Organic brewed coffee	Brazilian Lg	3.5	1	Jan	7	Sun	17
456	2023-01-01	17:46:21	2	8	Hell's Kitchen	36	3.75	Coffee	Premium brewed coffee	Jamaican Coffee River Lg	7.5	1	Jan	7	Sun	17
457	2023-01-01	17:46:21	1	8	Hell's Kitchen	76	3.5	Bakery	Biscotti	Chocolate Chip Biscotti	3.5	1	Jan	7	Sun	17
458	2023-01-01	17:49:04	2	8	Hell's Kitchen	60	3.75	Drinking Chocolate	Hot chocolate	Sustainably Grown Organic Rg	7.5	1	Jan	7	Sun	17
459	2023-01-01	17:50:19	1	5	Lower Manhattan	45	3	Tea	Brewed herbal tea	Peppermint Lg	3	1	Jan	7	Sun	17
460	2023-01-01	17:50:30	2	8	Hell's Kitchen	38	3.75	Coffee	Barista Espresso	Latte	7.5	1	Jan	7	Sun	17
461	2023-01-01	17:51:06	2	3	Astoria	60	3.75	Drinking Chocolate	Hot chocolate	Sustainably Grown Organic Rg	7.5	1	Jan	7	Sun	17
462	2023-01-01	17:54:11	2	3	Astoria	56	2.55	Tea	Brewed Chai tea	Spicy Eye Opener Chai Rg	5.1	1	Jan	7	Sun	17
463	2023-01-01	17:56:46	1	8	Hell's Kitchen	30	3	Coffee	Gourmet brewed coffee	Columbian Medium Roast Lg	3	1	Jan	7	Sun	17
464	2023-01-01	17:58:01	1	5	Lower Manhattan	39	4.25	Coffee	Barista Espresso	Latte Rg	4.25	1	Jan	7	Sun	17
465	2023-01-01	17:59:44	2	8	Hell's Kitchen	53	3	Tea	Brewed Chai tea	Traditional Blend Chai Lg	6	1	Jan	7	Sun	17
466	2023-01-01	17:59:44	1	8	Hell's Kitchen	76	3.5	Bakery	Biscotti	Chocolate Chip Biscotti	3.5	1	Jan	7	Sun	17
467	2023-01-01	18:01:08	2	8	Hell's Kitchen	45	3	Tea	Brewed herbal tea	Peppermint Lg	6	1	Jan	7	Sun	18
468	2023-01-01	18:02:00	1	3	Astoria	52	2.5	Tea	Brewed Chai tea	Traditional Blend Chai Rg	2.5	1	Jan	7	Sun	18
469	2023-01-01	18:02:21	2	5	Lower Manhattan	49	3	Tea	Brewed Black tea	English Breakfast Lg	6	1	Jan	7	Sun	18
470	2023-01-01	18:03:13	1	3	Astoria	28	2	Coffee	Gourmet brewed coffee	Columbian Medium Roast Sm	2	1	Jan	7	Sun	18
471	2023-01-01	18:03:13	1	3	Astoria	78	4.5	Bakery	Scone	Scottish Cream Scone	4.5	1	Jan	7	Sun	18
472	2023-01-01	18:04:34	1	3	Astoria	28	2	Coffee	Gourmet brewed coffee	Columbian Medium Roast Sm	2	1	Jan	7	Sun	18
473	2023-01-01	18:06:52	2	3	Astoria	30	3	Coffee	Gourmet brewed coffee	Columbian Medium Roast Lg	6	1	Jan	7	Sun	18
474	2023-01-01	18:06:52	1	3	Astoria	79	3.75	Bakery	Scone	Jumbo Savory Scone	3.75	1	Jan	7	Sun	18
475	2023-01-01	18:07:13	1	8	Hell's Kitchen	23	2.5	Coffee	Drip coffee	Our Old Time Diner Blend Rg	2.5	1	Jan	7	Sun	18
476	2023-01-01	18:08:53	2	3	Astoria	34	2.45	Coffee	Premium brewed coffee	Jamaican Coffee River Sm	4.9	1	Jan	7	Sun	18
477	2023-01-01	18:12:37	2	3	Astoria	25	2.2	Coffee	Organic brewed coffee	Brazilian Sm	4.4	1	Jan	7	Sun	18
478	2023-01-01	18:13:32	2	5	Lower Manhattan	23	2.5	Coffee	Drip coffee	Our Old Time Diner Blend Rg	5	1	Jan	7	Sun	18
479	2023-01-01	18:13:41	2	8	Hell's Kitchen	57	3.1	Tea	Brewed Chai tea	Spicy Eye Opener Chai Lg	6.2	1	Jan	7	Sun	18
480	2023-01-01	18:14:28	2	8	Hell's Kitchen	26	3	Coffee	Organic brewed coffee	Brazilian Rg	6	1	Jan	7	Sun	18
481	2023-01-01	18:17:09	2	8	Hell's Kitchen	36	3.75	Coffee	Premium brewed coffee	Jamaican Coffee River Lg	7.5	1	Jan	7	Sun	18
482	2023-01-01	18:18:10	1	3	Astoria	59	4.5	Drinking Chocolate	Hot chocolate	Dark chocolate Lg	4.5	1	Jan	7	Sun	18
483	2023-01-01	18:19:45	1	5	Lower Manhattan	52	2.5	Tea	Brewed Chai tea	Traditional Blend Chai Rg	2.5	1	Jan	7	Sun	18
484	2023-01-01	18:19:45	1	5	Lower Manhattan	76	3.5	Bakery	Biscotti	Chocolate Chip Biscotti	3.5	1	Jan	7	Sun	18
485	2023-01-01	18:21:22	1	3	Astoria	46	2.5	Tea	Brewed Green tea	Serenity Green Tea Rg	2.5	1	Jan	7	Sun	18
486	2023-01-01	18:22:12	2	3	Astoria	61	4.75	Drinking Chocolate	Hot chocolate	Sustainably Grown Organic Lg	9.5	1	Jan	7	Sun	18
487	2023-01-01	18:22:48	2	5	Lower Manhattan	37	3	Coffee	Barista Espresso	Espresso shot	6	1	Jan	7	Sun	18
488	2023-01-01	18:22:53	1	3	Astoria	32	3	Coffee	Gourmet brewed coffee	Ethiopia Rg	3	1	Jan	7	Sun	18
489	2023-01-01	18:22:53	1	3	Astoria	79	3.75	Bakery	Scone	Jumbo Savory Scone	3.75	1	Jan	7	Sun	18
490	2023-01-01	18:23:34	2	5	Lower Manhattan	53	3	Tea	Brewed Chai tea	Traditional Blend Chai Lg	6	1	Jan	7	Sun	18
491	2023-01-01	18:25:51	1	3	Astoria	61	4.75	Drinking Chocolate	Hot chocolate	Sustainably Grown Organic Lg	4.75	1	Jan	7	Sun	18
492	2023-01-01	18:25:57	1	8	Hell's Kitchen	43	3	Tea	Brewed herbal tea	Lemon Grass Lg	3	1	Jan	7	Sun	18
493	2023-01-01	18:27:08	2	5	Lower Manhattan	54	2.5	Tea	Brewed Chai tea	Morning Sunrise Chai Rg	5	1	Jan	7	Sun	18
494	2023-01-01	18:29:34	2	8	Hell's Kitchen	44	2.5	Tea	Brewed herbal tea	Peppermint Rg	5	1	Jan	7	Sun	18
495	2023-01-01	18:30:05	2	3	Astoria	55	4	Tea	Brewed Chai tea	Morning Sunrise Chai Lg	8	1	Jan	7	Sun	18
496	2023-01-01	18:34:56	2	3	Astoria	60	3.75	Drinking Chocolate	Hot chocolate	Sustainably Grown Organic Rg	7.5	1	Jan	7	Sun	18
497	2023-01-01	18:39:29	1	3	Astoria	22	2	Coffee	Drip coffee	Our Old Time Diner Blend Sm	2	1	Jan	7	Sun	18
498	2023-01-01	18:40:29	2	8	Hell's Kitchen	53	3	Tea	Brewed Chai tea	Traditional Blend Chai Lg	6	1	Jan	7	Sun	18
499	2023-01-01	18:41:13	1	3	Astoria	24	3	Coffee	Drip coffee	Our Old Time Diner Blend Lg	3	1	Jan	7	Sun	18
500	2023-01-01	18:41:28	2	8	Hell's Kitchen	49	3	Tea	Brewed Black tea	English Breakfast Lg	6	1	Jan	7	Sun	18
501	2023-01-01	18:42:04	2	3	Astoria	60	3.75	Drinking Chocolate	Hot chocolate	Sustainably Grown Organic Rg	7.5	1	Jan	7	Sun	18
502	2023-01-01	18:42:16	1	8	Hell's Kitchen	54	2.5	Tea	Brewed Chai tea	Morning Sunrise Chai Rg	2.5	1	Jan	7	Sun	18
503	2023-01-01	18:43:19	1	3	Astoria	57	3.1	Tea	Brewed Chai tea	Spicy Eye Opener Chai Lg	3.1	1	Jan	7	Sun	18
504	2023-01-01	18:43:42	1	3	Astoria	25	2.2	Coffee	Organic brewed coffee	Brazilian Sm	2.2	1	Jan	7	Sun	18
505	2023-01-01	18:45:11	2	3	Astoria	38	3.75	Coffee	Barista Espresso	Latte	7.5	1	Jan	7	Sun	18
506	2023-01-01	18:49:48	1	3	Astoria	27	3.5	Coffee	Organic brewed coffee	Brazilian Lg	3.5	1	Jan	7	Sun	18
507	2023-01-01	18:51:23	2	3	Astoria	24	3	Coffee	Drip coffee	Our Old Time Diner Blend Lg	6	1	Jan	7	Sun	18
508	2023-01-01	18:51:41	1	3	Astoria	28	2	Coffee	Gourmet brewed coffee	Columbian Medium Roast Sm	2	1	Jan	7	Sun	18
509	2023-01-01	18:52:18	2	8	Hell's Kitchen	22	2	Coffee	Drip coffee	Our Old Time Diner Blend Sm	4	1	Jan	7	Sun	18
510	2023-01-01	18:52:57	2	3	Astoria	59	4.5	Drinking Chocolate	Hot chocolate	Dark chocolate Lg	9	1	Jan	7	Sun	18
511	2023-01-01	18:55:19	2	3	Astoria	56	2.55	Tea	Brewed Chai tea	Spicy Eye Opener Chai Rg	5.1	1	Jan	7	Sun	18
512	2023-01-01	18:56:24	2	8	Hell's Kitchen	53	3	Tea	Brewed Chai tea	Traditional Blend Chai Lg	6	1	Jan	7	Sun	18
513	2023-01-01	18:56:35	2	8	Hell's Kitchen	39	4.25	Coffee	Barista Espresso	Latte Rg	8.5	1	Jan	7	Sun	18
514	2023-01-01	18:56:35	1	8	Hell's Kitchen	73	3.75	Bakery	Pastry	Almond Croissant	3.75	1	Jan	7	Sun	18
515	2023-01-01	19:00:27	1	3	Astoria	43	3	Tea	Brewed herbal tea	Lemon Grass Lg	3	1	Jan	7	Sun	19
516	2023-01-01	19:02:52	2	8	Hell's Kitchen	37	3	Coffee	Barista Espresso	Espresso shot	6	1	Jan	7	Sun	19
517	2023-01-01	19:06:58	1	8	Hell's Kitchen	38	3.75	Coffee	Barista Espresso	Latte	3.75	1	Jan	7	Sun	19
518	2023-01-01	19:07:26	2	8	Hell's Kitchen	24	3	Coffee	Drip coffee	Our Old Time Diner Blend Lg	6	1	Jan	7	Sun	19
519	2023-01-01	19:07:40	1	3	Astoria	55	4	Tea	Brewed Chai tea	Morning Sunrise Chai Lg	4	1	Jan	7	Sun	19
520	2023-01-01	19:08:11	2	8	Hell's Kitchen	27	3.5	Coffee	Organic brewed coffee	Brazilian Lg	7	1	Jan	7	Sun	19
521	2023-01-01	19:08:56	1	3	Astoria	60	3.75	Drinking Chocolate	Hot chocolate	Sustainably Grown Organic Rg	3.75	1	Jan	7	Sun	19
522	2023-01-01	19:09:54	1	8	Hell's Kitchen	41	4.25	Coffee	Barista Espresso	Cappuccino Lg	4.25	1	Jan	7	Sun	19
523	2023-01-01	19:10:16	2	3	Astoria	27	3.5	Coffee	Organic brewed coffee	Brazilian Lg	7	1	Jan	7	Sun	19
524	2023-01-01	19:10:53	2	8	Hell's Kitchen	55	4	Tea	Brewed Chai tea	Morning Sunrise Chai Lg	8	1	Jan	7	Sun	19
525	2023-01-01	19:12:49	2	3	Astoria	40	3.75	Coffee	Barista Espresso	Cappuccino	7.5	1	Jan	7	Sun	19
526	2023-01-01	19:14:09	2	3	Astoria	32	3	Coffee	Gourmet brewed coffee	Ethiopia Rg	6	1	Jan	7	Sun	19
527	2023-01-01	19:15:15	1	3	Astoria	55	4	Tea	Brewed Chai tea	Morning Sunrise Chai Lg	4	1	Jan	7	Sun	19
528	2023-01-01	19:21:35	1	8	Hell's Kitchen	49	3	Tea	Brewed Black tea	English Breakfast Lg	3	1	Jan	7	Sun	19
529	2023-01-01	19:22:39	1	8	Hell's Kitchen	40	3.75	Coffee	Barista Espresso	Cappuccino	3.75	1	Jan	7	Sun	19
530	2023-01-01	19:24:18	1	8	Hell's Kitchen	46	2.5	Tea	Brewed Green tea	Serenity Green Tea Rg	2.5	1	Jan	7	Sun	19
531	2023-01-01	19:24:18	1	8	Hell's Kitchen	77	3	Bakery	Scone	Oatmeal Scone	3	1	Jan	7	Sun	19
532	2023-01-01	19:29:01	2	3	Astoria	44	2.5	Tea	Brewed herbal tea	Peppermint Rg	5	1	Jan	7	Sun	19
533	2023-01-01	19:29:07	1	3	Astoria	38	3.75	Coffee	Barista Espresso	Latte	3.75	1	Jan	7	Sun	19
534	2023-01-01	19:30:55	2	3	Astoria	51	3	Tea	Brewed Black tea	Earl Grey Lg	6	1	Jan	7	Sun	19
535	2023-01-01	19:34:03	1	8	Hell's Kitchen	43	3	Tea	Brewed herbal tea	Lemon Grass Lg	3	1	Jan	7	Sun	19
536	2023-01-01	19:34:39	2	8	Hell's Kitchen	61	4.75	Drinking Chocolate	Hot chocolate	Sustainably Grown Organic Lg	9.5	1	Jan	7	Sun	19
537	2023-01-01	19:34:48	1	3	Astoria	40	3.75	Coffee	Barista Espresso	Cappuccino	3.75	1	Jan	7	Sun	19
538	2023-01-01	19:35:55	2	8	Hell's Kitchen	27	3.5	Coffee	Organic brewed coffee	Brazilian Lg	7	1	Jan	7	Sun	19
539	2023-01-01	19:37:51	1	3	Astoria	60	3.75	Drinking Chocolate	Hot chocolate	Sustainably Grown Organic Rg	3.75	1	Jan	7	Sun	19
540	2023-01-01	19:38:46	2	3	Astoria	55	4	Tea	Brewed Chai tea	Morning Sunrise Chai Lg	8	1	Jan	7	Sun	19
541	2023-01-01	19:39:00	2	3	Astoria	47	3	Tea	Brewed Green tea	Serenity Green Tea Lg	6	1	Jan	7	Sun	19
542	2023-01-01	19:39:32	1	3	Astoria	37	3	Coffee	Barista Espresso	Espresso shot	3	1	Jan	7	Sun	19
543	2023-01-01	19:43:29	1	3	Astoria	54	2.5	Tea	Brewed Chai tea	Morning Sunrise Chai Rg	2.5	1	Jan	7	Sun	19
544	2023-01-01	19:44:41	1	8	Hell's Kitchen	61	4.75	Drinking Chocolate	Hot chocolate	Sustainably Grown Organic Lg	4.75	1	Jan	7	Sun	19
545	2023-01-01	19:45:28	1	8	Hell's Kitchen	26	3	Coffee	Organic brewed coffee	Brazilian Rg	3	1	Jan	7	Sun	19
546	2023-01-01	19:49:37	1	3	Astoria	36	3.75	Coffee	Premium brewed coffee	Jamaican Coffee River Lg	3.75	1	Jan	7	Sun	19
547	2023-01-01	19:52:47	1	8	Hell's Kitchen	32	3	Coffee	Gourmet brewed coffee	Ethiopia Rg	3	1	Jan	7	Sun	19
548	2023-01-01	19:57:56	1	3	Astoria	35	3.1	Coffee	Premium brewed coffee	Jamaican Coffee River Rg	3.1	1	Jan	7	Sun	19
549	2023-01-01	19:58:29	1	3	Astoria	55	4	Tea	Brewed Chai tea	Morning Sunrise Chai Lg	4	1	Jan	7	Sun	19
550	2023-01-01	19:58:52	1	3	Astoria	39	4.25	Coffee	Barista Espresso	Latte Rg	4.25	1	Jan	7	Sun	19
551	2023-01-02	07:01:59	1	5	Lower Manhattan	87	3	Coffee	Barista Espresso	Ouro Brasileiro shot	3	1	Jan	1	Mon	7
552	2023-01-02	07:12:05	1	5	Lower Manhattan	51	3	Tea	Brewed Black tea	Earl Grey Lg	3	1	Jan	1	Mon	7
553	2023-01-02	07:16:35	2	5	Lower Manhattan	28	2	Coffee	Gourmet brewed coffee	Columbian Medium Roast Sm	4	1	Jan	1	Mon	7
554	2023-01-02	07:16:46	1	5	Lower Manhattan	57	3.1	Tea	Brewed Chai tea	Spicy Eye Opener Chai Lg	3.1	1	Jan	1	Mon	7
555	2023-01-02	07:16:46	1	5	Lower Manhattan	70	3.25	Bakery	Scone	Cranberry Scone	3.25	1	Jan	1	Mon	7
556	2023-01-02	07:22:08	2	5	Lower Manhattan	61	4.75	Drinking Chocolate	Hot chocolate	Sustainably Grown Organic Lg	9.5	1	Jan	1	Mon	7
557	2023-01-02	07:22:45	1	5	Lower Manhattan	42	2.5	Tea	Brewed herbal tea	Lemon Grass Rg	2.5	1	Jan	1	Mon	7
558	2023-01-02	07:25:59	1	5	Lower Manhattan	24	3	Coffee	Drip coffee	Our Old Time Diner Blend Lg	3	1	Jan	1	Mon	7
559	2023-01-02	07:35:10	1	5	Lower Manhattan	53	3	Tea	Brewed Chai tea	Traditional Blend Chai Lg	3	1	Jan	1	Mon	7
560	2023-01-02	07:48:26	1	5	Lower Manhattan	41	4.25	Coffee	Barista Espresso	Cappuccino Lg	4.25	1	Jan	1	Mon	7
561	2023-01-02	07:48:26	1	5	Lower Manhattan	75	3.5	Bakery	Pastry	Croissant	3.5	1	Jan	1	Mon	7
562	2023-01-02	07:53:48	2	5	Lower Manhattan	27	3.5	Coffee	Organic brewed coffee	Brazilian Lg	7	1	Jan	1	Mon	7
563	2023-01-02	07:59:47	1	5	Lower Manhattan	48	2.5	Tea	Brewed Black tea	English Breakfast Rg	2.5	1	Jan	1	Mon	7
564	2023-01-02	07:59:47	1	5	Lower Manhattan	75	3.5	Bakery	Pastry	Croissant	3.5	1	Jan	1	Mon	7
565	2023-01-02	08:03:47	2	8	Hell's Kitchen	32	3	Coffee	Gourmet brewed coffee	Ethiopia Rg	6	1	Jan	1	Mon	8
566	2023-01-02	08:04:06	2	8	Hell's Kitchen	31	2.2	Coffee	Gourmet brewed coffee	Ethiopia Sm	4.4	1	Jan	1	Mon	8
567	2023-01-02	08:04:55	1	8	Hell's Kitchen	25	2.2	Coffee	Organic brewed coffee	Brazilian Sm	2.2	1	Jan	1	Mon	8
568	2023-01-02	08:04:59	1	5	Lower Manhattan	61	4.75	Drinking Chocolate	Hot chocolate	Sustainably Grown Organic Lg	4.75	1	Jan	1	Mon	8
569	2023-01-02	08:09:46	1	5	Lower Manhattan	48	2.5	Tea	Brewed Black tea	English Breakfast Rg	2.5	1	Jan	1	Mon	8
570	2023-01-02	08:09:51	1	5	Lower Manhattan	61	4.75	Drinking Chocolate	Hot chocolate	Sustainably Grown Organic Lg	4.75	1	Jan	1	Mon	8
571	2023-01-02	08:11:11	2	8	Hell's Kitchen	61	4.75	Drinking Chocolate	Hot chocolate	Sustainably Grown Organic Lg	9.5	1	Jan	1	Mon	8
572	2023-01-02	08:11:11	1	8	Hell's Kitchen	74	3.5	Bakery	Biscotti	Ginger Biscotti	3.5	1	Jan	1	Mon	8
573	2023-01-02	08:13:24	1	8	Hell's Kitchen	27	3.5	Coffee	Organic brewed coffee	Brazilian Lg	3.5	1	Jan	1	Mon	8
574	2023-01-02	08:14:13	1	5	Lower Manhattan	55	4	Tea	Brewed Chai tea	Morning Sunrise Chai Lg	4	1	Jan	1	Mon	8
575	2023-01-02	08:15:07	1	8	Hell's Kitchen	36	3.75	Coffee	Premium brewed coffee	Jamaican Coffee River Lg	3.75	1	Jan	1	Mon	8
576	2023-01-02	08:15:10	2	8	Hell's Kitchen	30	3	Coffee	Gourmet brewed coffee	Columbian Medium Roast Lg	6	1	Jan	1	Mon	8
577	2023-01-02	08:17:28	1	8	Hell's Kitchen	44	2.5	Tea	Brewed herbal tea	Peppermint Rg	2.5	1	Jan	1	Mon	8
578	2023-01-02	08:20:38	2	5	Lower Manhattan	44	2.5	Tea	Brewed herbal tea	Peppermint Rg	5	1	Jan	1	Mon	8
579	2023-01-02	08:21:32	2	8	Hell's Kitchen	38	3.75	Coffee	Barista Espresso	Latte	7.5	1	Jan	1	Mon	8
580	2023-01-02	08:23:15	1	8	Hell's Kitchen	26	3	Coffee	Organic brewed coffee	Brazilian Rg	3	1	Jan	1	Mon	8
581	2023-01-02	08:25:22	1	5	Lower Manhattan	25	2.2	Coffee	Organic brewed coffee	Brazilian Sm	2.2	1	Jan	1	Mon	8
582	2023-01-02	08:26:13	2	5	Lower Manhattan	28	2	Coffee	Gourmet brewed coffee	Columbian Medium Roast Sm	4	1	Jan	1	Mon	8
583	2023-01-02	08:26:21	2	8	Hell's Kitchen	31	2.2	Coffee	Gourmet brewed coffee	Ethiopia Sm	4.4	1	Jan	1	Mon	8
584	2023-01-02	08:30:10	1	5	Lower Manhattan	29	2.5	Coffee	Gourmet brewed coffee	Columbian Medium Roast Rg	2.5	1	Jan	1	Mon	8
585	2023-01-02	08:31:35	1	8	Hell's Kitchen	35	3.1	Coffee	Premium brewed coffee	Jamaican Coffee River Rg	3.1	1	Jan	1	Mon	8
586	2023-01-02	08:34:25	2	8	Hell's Kitchen	25	2.2	Coffee	Organic brewed coffee	Brazilian Sm	4.4	1	Jan	1	Mon	8
587	2023-01-02	08:34:30	1	8	Hell's Kitchen	48	2.5	Tea	Brewed Black tea	English Breakfast Rg	2.5	1	Jan	1	Mon	8
588	2023-01-02	08:43:50	1	8	Hell's Kitchen	32	3	Coffee	Gourmet brewed coffee	Ethiopia Rg	3	1	Jan	1	Mon	8
589	2023-01-02	08:51:31	2	5	Lower Manhattan	32	3	Coffee	Gourmet brewed coffee	Ethiopia Rg	6	1	Jan	1	Mon	8
590	2023-01-02	08:55:40	1	5	Lower Manhattan	28	2	Coffee	Gourmet brewed coffee	Columbian Medium Roast Sm	2	1	Jan	1	Mon	8
591	2023-01-02	09:00:14	1	8	Hell's Kitchen	39	4.25	Coffee	Barista Espresso	Latte Rg	4.25	1	Jan	1	Mon	9
592	2023-01-02	09:01:24	1	8	Hell's Kitchen	53	3	Tea	Brewed Chai tea	Traditional Blend Chai Lg	3	1	Jan	1	Mon	9
593	2023-01-02	09:06:29	1	5	Lower Manhattan	33	3.5	Coffee	Gourmet brewed coffee	Ethiopia Lg	3.5	1	Jan	1	Mon	9
594	2023-01-02	09:07:31	2	5	Lower Manhattan	37	3	Coffee	Barista Espresso	Espresso shot	6	1	Jan	1	Mon	9
595	2023-01-02	09:11:10	1	8	Hell's Kitchen	59	4.5	Drinking Chocolate	Hot chocolate	Dark chocolate Lg	4.5	1	Jan	1	Mon	9
596	2023-01-02	09:11:10	1	8	Hell's Kitchen	79	3.75	Bakery	Scone	Jumbo Savory Scone	3.75	1	Jan	1	Mon	9
597	2023-01-02	09:11:45	1	8	Hell's Kitchen	61	4.75	Drinking Chocolate	Hot chocolate	Sustainably Grown Organic Lg	4.75	1	Jan	1	Mon	9
598	2023-01-02	09:11:57	2	8	Hell's Kitchen	34	2.45	Coffee	Premium brewed coffee	Jamaican Coffee River Sm	4.9	1	Jan	1	Mon	9
599	2023-01-02	09:11:57	1	8	Hell's Kitchen	72	3.25	Bakery	Scone	Ginger Scone	3.25	1	Jan	1	Mon	9
600	2023-01-02	09:12:47	2	5	Lower Manhattan	31	2.2	Coffee	Gourmet brewed coffee	Ethiopia Sm	4.4	1	Jan	1	Mon	9
601	2023-01-02	09:12:47	1	5	Lower Manhattan	75	3.5	Bakery	Pastry	Croissant	3.5	1	Jan	1	Mon	9
602	2023-01-02	09:17:08	1	8	Hell's Kitchen	46	2.5	Tea	Brewed Green tea	Serenity Green Tea Rg	2.5	1	Jan	1	Mon	9
603	2023-01-02	09:21:01	1	8	Hell's Kitchen	55	4	Tea	Brewed Chai tea	Morning Sunrise Chai Lg	4	1	Jan	1	Mon	9
604	2023-01-02	09:22:26	1	8	Hell's Kitchen	40	3.75	Coffee	Barista Espresso	Cappuccino	3.75	1	Jan	1	Mon	9
605	2023-01-02	09:25:27	1	5	Lower Manhattan	29	2.5	Coffee	Gourmet brewed coffee	Columbian Medium Roast Rg	2.5	1	Jan	1	Mon	9
606	2023-01-02	09:26:16	2	8	Hell's Kitchen	28	2	Coffee	Gourmet brewed coffee	Columbian Medium Roast Sm	4	1	Jan	1	Mon	9
607	2023-01-02	09:29:47	2	8	Hell's Kitchen	22	2	Coffee	Drip coffee	Our Old Time Diner Blend Sm	4	1	Jan	1	Mon	9
608	2023-01-02	09:29:47	1	8	Hell's Kitchen	70	3.25	Bakery	Scone	Cranberry Scone	3.25	1	Jan	1	Mon	9
609	2023-01-02	09:31:37	2	8	Hell's Kitchen	59	4.5	Drinking Chocolate	Hot chocolate	Dark chocolate Lg	9	1	Jan	1	Mon	9
610	2023-01-02	09:33:57	2	8	Hell's Kitchen	23	2.5	Coffee	Drip coffee	Our Old Time Diner Blend Rg	5	1	Jan	1	Mon	9
611	2023-01-02	09:36:26	1	8	Hell's Kitchen	87	3	Coffee	Barista Espresso	Ouro Brasileiro shot	3	1	Jan	1	Mon	9
612	2023-01-02	09:38:46	2	8	Hell's Kitchen	87	3	Coffee	Barista Espresso	Ouro Brasileiro shot	6	1	Jan	1	Mon	9
613	2023-01-02	09:40:52	1	5	Lower Manhattan	48	2.5	Tea	Brewed Black tea	English Breakfast Rg	2.5	1	Jan	1	Mon	9
614	2023-01-02	09:45:34	1	5	Lower Manhattan	30	3	Coffee	Gourmet brewed coffee	Columbian Medium Roast Lg	3	1	Jan	1	Mon	9
615	2023-01-02	09:46:33	2	8	Hell's Kitchen	48	2.5	Tea	Brewed Black tea	English Breakfast Rg	5	1	Jan	1	Mon	9
616	2023-01-02	09:48:46	2	8	Hell's Kitchen	32	3	Coffee	Gourmet brewed coffee	Ethiopia Rg	6	1	Jan	1	Mon	9
617	2023-01-02	09:50:09	1	8	Hell's Kitchen	27	3.5	Coffee	Organic brewed coffee	Brazilian Lg	3.5	1	Jan	1	Mon	9
618	2023-01-02	09:50:57	1	5	Lower Manhattan	23	2.5	Coffee	Drip coffee	Our Old Time Diner Blend Rg	2.5	1	Jan	1	Mon	9
619	2023-01-02	09:52:17	1	5	Lower Manhattan	26	3	Coffee	Organic brewed coffee	Brazilian Rg	3	1	Jan	1	Mon	9
620	2023-01-02	09:54:48	1	8	Hell's Kitchen	34	2.45	Coffee	Premium brewed coffee	Jamaican Coffee River Sm	2.45	1	Jan	1	Mon	9
621	2023-01-02	09:56:28	2	8	Hell's Kitchen	41	4.25	Coffee	Barista Espresso	Cappuccino Lg	8.5	1	Jan	1	Mon	9
622	2023-01-02	09:56:45	1	5	Lower Manhattan	51	3	Tea	Brewed Black tea	Earl Grey Lg	3	1	Jan	1	Mon	9
623	2023-01-02	09:58:47	2	5	Lower Manhattan	37	3	Coffee	Barista Espresso	Espresso shot	6	1	Jan	1	Mon	9
624	2023-01-02	10:01:57	1	8	Hell's Kitchen	61	4.75	Drinking Chocolate	Hot chocolate	Sustainably Grown Organic Lg	4.75	1	Jan	1	Mon	10
625	2023-01-02	10:03:39	1	8	Hell's Kitchen	30	3	Coffee	Gourmet brewed coffee	Columbian Medium Roast Lg	3	1	Jan	1	Mon	10
626	2023-01-02	10:03:39	1	8	Hell's Kitchen	76	3.5	Bakery	Biscotti	Chocolate Chip Biscotti	3.5	1	Jan	1	Mon	10
627	2023-01-02	10:05:11	1	5	Lower Manhattan	58	3.5	Drinking Chocolate	Hot chocolate	Dark chocolate Rg	3.5	1	Jan	1	Mon	10
628	2023-01-02	10:05:22	1	5	Lower Manhattan	55	4	Tea	Brewed Chai tea	Morning Sunrise Chai Lg	4	1	Jan	1	Mon	10
629	2023-01-02	10:07:28	1	5	Lower Manhattan	26	3	Coffee	Organic brewed coffee	Brazilian Rg	3	1	Jan	1	Mon	10
630	2023-01-02	10:08:23	1	8	Hell's Kitchen	43	3	Tea	Brewed herbal tea	Lemon Grass Lg	3	1	Jan	1	Mon	10
631	2023-01-02	10:10:47	2	8	Hell's Kitchen	56	2.55	Tea	Brewed Chai tea	Spicy Eye Opener Chai Rg	5.1	1	Jan	1	Mon	10
632	2023-01-02	10:13:55	2	5	Lower Manhattan	26	3	Coffee	Organic brewed coffee	Brazilian Rg	6	1	Jan	1	Mon	10
633	2023-01-02	10:13:55	1	5	Lower Manhattan	79	3.75	Bakery	Scone	Jumbo Savory Scone	3.75	1	Jan	1	Mon	10
634	2023-01-02	10:16:43	1	5	Lower Manhattan	28	2	Coffee	Gourmet brewed coffee	Columbian Medium Roast Sm	2	1	Jan	1	Mon	10
635	2023-01-02	10:19:33	1	8	Hell's Kitchen	61	4.75	Drinking Chocolate	Hot chocolate	Sustainably Grown Organic Lg	4.75	1	Jan	1	Mon	10
636	2023-01-02	10:20:52	2	8	Hell's Kitchen	42	2.5	Tea	Brewed herbal tea	Lemon Grass Rg	5	1	Jan	1	Mon	10
637	2023-01-02	10:22:19	1	5	Lower Manhattan	23	2.5	Coffee	Drip coffee	Our Old Time Diner Blend Rg	2.5	1	Jan	1	Mon	10
638	2023-01-02	10:26:49	1	5	Lower Manhattan	23	2.5	Coffee	Drip coffee	Our Old Time Diner Blend Rg	2.5	1	Jan	1	Mon	10
639	2023-01-02	10:27:05	1	5	Lower Manhattan	25	2.2	Coffee	Organic brewed coffee	Brazilian Sm	2.2	1	Jan	1	Mon	10
640	2023-01-02	10:28:41	1	8	Hell's Kitchen	42	2.5	Tea	Brewed herbal tea	Lemon Grass Rg	2.5	1	Jan	1	Mon	10
641	2023-01-02	10:30:39	2	8	Hell's Kitchen	44	2.5	Tea	Brewed herbal tea	Peppermint Rg	5	1	Jan	1	Mon	10
642	2023-01-02	10:36:18	2	8	Hell's Kitchen	50	2.5	Tea	Brewed Black tea	Earl Grey Rg	5	1	Jan	1	Mon	10
643	2023-01-02	10:36:44	1	5	Lower Manhattan	51	3	Tea	Brewed Black tea	Earl Grey Lg	3	1	Jan	1	Mon	10
644	2023-01-02	10:38:55	2	8	Hell's Kitchen	51	3	Tea	Brewed Black tea	Earl Grey Lg	6	1	Jan	1	Mon	10
645	2023-01-02	10:48:57	1	5	Lower Manhattan	53	3	Tea	Brewed Chai tea	Traditional Blend Chai Lg	3	1	Jan	1	Mon	10
646	2023-01-02	10:49:58	1	8	Hell's Kitchen	32	3	Coffee	Gourmet brewed coffee	Ethiopia Rg	3	1	Jan	1	Mon	10
647	2023-01-02	10:55:08	1	8	Hell's Kitchen	55	4	Tea	Brewed Chai tea	Morning Sunrise Chai Lg	4	1	Jan	1	Mon	10
648	2023-01-02	10:55:35	1	8	Hell's Kitchen	48	2.5	Tea	Brewed Black tea	English Breakfast Rg	2.5	1	Jan	1	Mon	10
649	2023-01-02	10:59:58	1	8	Hell's Kitchen	32	3	Coffee	Gourmet brewed coffee	Ethiopia Rg	3	1	Jan	1	Mon	10
650	2023-01-02	11:01:06	2	5	Lower Manhattan	48	2.5	Tea	Brewed Black tea	English Breakfast Rg	5	1	Jan	1	Mon	11
651	2023-01-02	11:04:21	1	3	Astoria	27	3.5	Coffee	Organic brewed coffee	Brazilian Lg	3.5	1	Jan	1	Mon	11
652	2023-01-02	11:04:21	1	3	Astoria	70	3.25	Bakery	Scone	Cranberry Scone	3.25	1	Jan	1	Mon	11
653	2023-01-02	11:06:10	1	3	Astoria	26	3	Coffee	Organic brewed coffee	Brazilian Rg	3	1	Jan	1	Mon	11
654	2023-01-02	11:06:10	1	3	Astoria	77	3	Bakery	Scone	Oatmeal Scone	3	1	Jan	1	Mon	11
655	2023-01-02	11:06:28	1	5	Lower Manhattan	25	2.2	Coffee	Organic brewed coffee	Brazilian Sm	2.2	1	Jan	1	Mon	11
656	2023-01-02	11:10:15	2	8	Hell's Kitchen	29	2.5	Coffee	Gourmet brewed coffee	Columbian Medium Roast Rg	5	1	Jan	1	Mon	11
657	2023-01-02	11:11:23	2	3	Astoria	26	3	Coffee	Organic brewed coffee	Brazilian Rg	6	1	Jan	1	Mon	11
658	2023-01-02	11:12:05	1	8	Hell's Kitchen	41	4.25	Coffee	Barista Espresso	Cappuccino Lg	4.25	1	Jan	1	Mon	11
659	2023-01-02	11:12:33	1	5	Lower Manhattan	46	2.5	Tea	Brewed Green tea	Serenity Green Tea Rg	2.5	1	Jan	1	Mon	11
660	2023-01-02	11:13:01	2	3	Astoria	22	2	Coffee	Drip coffee	Our Old Time Diner Blend Sm	4	1	Jan	1	Mon	11
661	2023-01-02	11:13:37	1	8	Hell's Kitchen	50	2.5	Tea	Brewed Black tea	Earl Grey Rg	2.5	1	Jan	1	Mon	11
662	2023-01-02	11:14:15	2	3	Astoria	32	3	Coffee	Gourmet brewed coffee	Ethiopia Rg	6	1	Jan	1	Mon	11
663	2023-01-02	11:15:12	1	3	Astoria	40	3.75	Coffee	Barista Espresso	Cappuccino	3.75	1	Jan	1	Mon	11
664	2023-01-02	11:15:28	1	3	Astoria	30	3	Coffee	Gourmet brewed coffee	Columbian Medium Roast Lg	3	1	Jan	1	Mon	11
665	2023-01-02	11:15:40	1	3	Astoria	42	2.5	Tea	Brewed herbal tea	Lemon Grass Rg	2.5	1	Jan	1	Mon	11
666	2023-01-02	11:16:51	2	3	Astoria	31	2.2	Coffee	Gourmet brewed coffee	Ethiopia Sm	4.4	1	Jan	1	Mon	11
667	2023-01-02	11:16:51	1	3	Astoria	75	3.5	Bakery	Pastry	Croissant	3.5	1	Jan	1	Mon	11
668	2023-01-02	11:18:12	2	3	Astoria	36	3.75	Coffee	Premium brewed coffee	Jamaican Coffee River Lg	7.5	1	Jan	1	Mon	11
669	2023-01-02	11:18:25	2	3	Astoria	52	2.5	Tea	Brewed Chai tea	Traditional Blend Chai Rg	5	1	Jan	1	Mon	11
670	2023-01-02	11:19:12	2	3	Astoria	30	3	Coffee	Gourmet brewed coffee	Columbian Medium Roast Lg	6	1	Jan	1	Mon	11
671	2023-01-02	11:19:42	1	8	Hell's Kitchen	35	3.1	Coffee	Premium brewed coffee	Jamaican Coffee River Rg	3.1	1	Jan	1	Mon	11
672	2023-01-02	11:21:43	2	3	Astoria	29	2.5	Coffee	Gourmet brewed coffee	Columbian Medium Roast Rg	5	1	Jan	1	Mon	11
673	2023-01-02	11:21:49	2	3	Astoria	38	3.75	Coffee	Barista Espresso	Latte	7.5	1	Jan	1	Mon	11
674	2023-01-02	11:22:46	1	3	Astoria	53	3	Tea	Brewed Chai tea	Traditional Blend Chai Lg	3	1	Jan	1	Mon	11
675	2023-01-02	11:25:20	2	5	Lower Manhattan	54	2.5	Tea	Brewed Chai tea	Morning Sunrise Chai Rg	5	1	Jan	1	Mon	11
676	2023-01-02	11:27:35	2	5	Lower Manhattan	48	2.5	Tea	Brewed Black tea	English Breakfast Rg	5	1	Jan	1	Mon	11
677	2023-01-02	11:32:11	2	8	Hell's Kitchen	47	3	Tea	Brewed Green tea	Serenity Green Tea Lg	6	1	Jan	1	Mon	11
678	2023-01-02	11:34:44	1	8	Hell's Kitchen	43	3	Tea	Brewed herbal tea	Lemon Grass Lg	3	1	Jan	1	Mon	11
679	2023-01-02	11:35:02	1	3	Astoria	49	3	Tea	Brewed Black tea	English Breakfast Lg	3	1	Jan	1	Mon	11
680	2023-01-02	11:35:02	1	3	Astoria	79	3.75	Bakery	Scone	Jumbo Savory Scone	3.75	1	Jan	1	Mon	11
681	2023-01-02	11:35:14	2	3	Astoria	25	2.2	Coffee	Organic brewed coffee	Brazilian Sm	4.4	1	Jan	1	Mon	11
682	2023-01-02	11:35:14	1	3	Astoria	69	3.25	Bakery	Biscotti	Hazelnut Biscotti	3.25	1	Jan	1	Mon	11
683	2023-01-02	11:36:50	2	5	Lower Manhattan	58	3.5	Drinking Chocolate	Hot chocolate	Dark chocolate Rg	7	1	Jan	1	Mon	11
684	2023-01-02	11:38:23	2	3	Astoria	24	3	Coffee	Drip coffee	Our Old Time Diner Blend Lg	6	1	Jan	1	Mon	11
685	2023-01-02	11:39:11	2	5	Lower Manhattan	42	2.5	Tea	Brewed herbal tea	Lemon Grass Rg	5	1	Jan	1	Mon	11
686	2023-01-02	11:39:11	1	5	Lower Manhattan	74	3.5	Bakery	Biscotti	Ginger Biscotti	3.5	1	Jan	1	Mon	11
687	2023-01-02	11:40:12	2	8	Hell's Kitchen	45	3	Tea	Brewed herbal tea	Peppermint Lg	6	1	Jan	1	Mon	11
688	2023-01-02	11:41:54	1	5	Lower Manhattan	48	2.5	Tea	Brewed Black tea	English Breakfast Rg	2.5	1	Jan	1	Mon	11
689	2023-01-02	11:42:36	2	8	Hell's Kitchen	45	3	Tea	Brewed herbal tea	Peppermint Lg	6	1	Jan	1	Mon	11
690	2023-01-02	11:42:36	1	8	Hell's Kitchen	72	3.25	Bakery	Scone	Ginger Scone	3.25	1	Jan	1	Mon	11
691	2023-01-02	11:43:04	2	3	Astoria	26	3	Coffee	Organic brewed coffee	Brazilian Rg	6	1	Jan	1	Mon	11
692	2023-01-02	11:49:10	1	5	Lower Manhattan	44	2.5	Tea	Brewed herbal tea	Peppermint Rg	2.5	1	Jan	1	Mon	11
693	2023-01-02	11:50:18	1	8	Hell's Kitchen	33	3.5	Coffee	Gourmet brewed coffee	Ethiopia Lg	3.5	1	Jan	1	Mon	11
694	2023-01-02	11:50:32	1	8	Hell's Kitchen	33	3.5	Coffee	Gourmet brewed coffee	Ethiopia Lg	3.5	1	Jan	1	Mon	11
695	2023-01-02	11:53:48	2	8	Hell's Kitchen	48	2.5	Tea	Brewed Black tea	English Breakfast Rg	5	1	Jan	1	Mon	11
696	2023-01-02	11:53:54	2	8	Hell's Kitchen	59	4.5	Drinking Chocolate	Hot chocolate	Dark chocolate Lg	9	1	Jan	1	Mon	11
697	2023-01-02	11:54:01	2	5	Lower Manhattan	43	3	Tea	Brewed herbal tea	Lemon Grass Lg	6	1	Jan	1	Mon	11
698	2023-01-02	11:54:30	1	3	Astoria	26	3	Coffee	Organic brewed coffee	Brazilian Rg	3	1	Jan	1	Mon	11
699	2023-01-02	11:55:31	1	3	Astoria	53	3	Tea	Brewed Chai tea	Traditional Blend Chai Lg	3	1	Jan	1	Mon	11
700	2023-01-02	11:56:26	1	8	Hell's Kitchen	28	2	Coffee	Gourmet brewed coffee	Columbian Medium Roast Sm	2	1	Jan	1	Mon	11
701	2023-01-02	11:56:58	1	8	Hell's Kitchen	37	3	Coffee	Barista Espresso	Espresso shot	3	1	Jan	1	Mon	11
702	2023-01-02	11:56:58	1	8	Hell's Kitchen	78	4.5	Bakery	Scone	Scottish Cream Scone	4.5	1	Jan	1	Mon	11
703	2023-01-02	11:58:49	2	8	Hell's Kitchen	35	3.1	Coffee	Premium brewed coffee	Jamaican Coffee River Rg	6.2	1	Jan	1	Mon	11
704	2023-01-02	11:58:49	1	8	Hell's Kitchen	71	3.75	Bakery	Pastry	Chocolate Croissant	3.75	1	Jan	1	Mon	11
705	2023-01-02	12:01:50	1	3	Astoria	53	3	Tea	Brewed Chai tea	Traditional Blend Chai Lg	3	1	Jan	1	Mon	12
706	2023-01-02	12:03:47	1	3	Astoria	23	2.5	Coffee	Drip coffee	Our Old Time Diner Blend Rg	2.5	1	Jan	1	Mon	12
707	2023-01-02	12:06:18	1	3	Astoria	32	3	Coffee	Gourmet brewed coffee	Ethiopia Rg	3	1	Jan	1	Mon	12
708	2023-01-02	12:12:01	2	3	Astoria	24	3	Coffee	Drip coffee	Our Old Time Diner Blend Lg	6	1	Jan	1	Mon	12
709	2023-01-02	12:12:44	1	3	Astoria	42	2.5	Tea	Brewed herbal tea	Lemon Grass Rg	2.5	1	Jan	1	Mon	12
710	2023-01-02	12:14:00	1	8	Hell's Kitchen	54	2.5	Tea	Brewed Chai tea	Morning Sunrise Chai Rg	2.5	1	Jan	1	Mon	12
711	2023-01-02	12:18:13	1	3	Astoria	55	4	Tea	Brewed Chai tea	Morning Sunrise Chai Lg	4	1	Jan	1	Mon	12
712	2023-01-02	12:18:22	2	3	Astoria	25	2.2	Coffee	Organic brewed coffee	Brazilian Sm	4.4	1	Jan	1	Mon	12
713	2023-01-02	12:18:22	1	3	Astoria	79	3.75	Bakery	Scone	Jumbo Savory Scone	3.75	1	Jan	1	Mon	12
714	2023-01-02	12:20:43	1	5	Lower Manhattan	47	3	Tea	Brewed Green tea	Serenity Green Tea Lg	3	1	Jan	1	Mon	12
715	2023-01-02	12:20:43	1	5	Lower Manhattan	71	3.75	Bakery	Pastry	Chocolate Croissant	3.75	1	Jan	1	Mon	12
716	2023-01-02	12:21:38	1	8	Hell's Kitchen	48	2.5	Tea	Brewed Black tea	English Breakfast Rg	2.5	1	Jan	1	Mon	12
717	2023-01-02	12:21:39	1	3	Astoria	49	3	Tea	Brewed Black tea	English Breakfast Lg	3	1	Jan	1	Mon	12
718	2023-01-02	12:21:58	2	3	Astoria	53	3	Tea	Brewed Chai tea	Traditional Blend Chai Lg	6	1	Jan	1	Mon	12
719	2023-01-02	12:22:04	1	3	Astoria	22	2	Coffee	Drip coffee	Our Old Time Diner Blend Sm	2	1	Jan	1	Mon	12
720	2023-01-02	12:22:12	1	5	Lower Manhattan	55	4	Tea	Brewed Chai tea	Morning Sunrise Chai Lg	4	1	Jan	1	Mon	12
721	2023-01-02	12:22:12	1	5	Lower Manhattan	79	3.75	Bakery	Scone	Jumbo Savory Scone	3.75	1	Jan	1	Mon	12
722	2023-01-02	12:23:03	1	5	Lower Manhattan	22	2	Coffee	Drip coffee	Our Old Time Diner Blend Sm	2	1	Jan	1	Mon	12
723	2023-01-02	12:23:30	1	3	Astoria	43	3	Tea	Brewed herbal tea	Lemon Grass Lg	3	1	Jan	1	Mon	12
724	2023-01-02	12:23:30	1	3	Astoria	78	4.5	Bakery	Scone	Scottish Cream Scone	4.5	1	Jan	1	Mon	12
725	2023-01-02	12:24:39	2	5	Lower Manhattan	33	3.5	Coffee	Gourmet brewed coffee	Ethiopia Lg	7	1	Jan	1	Mon	12
726	2023-01-02	12:24:39	1	5	Lower Manhattan	69	3.25	Bakery	Biscotti	Hazelnut Biscotti	3.25	1	Jan	1	Mon	12
727	2023-01-02	12:25:03	1	3	Astoria	24	3	Coffee	Drip coffee	Our Old Time Diner Blend Lg	3	1	Jan	1	Mon	12
728	2023-01-02	12:25:24	2	5	Lower Manhattan	56	2.55	Tea	Brewed Chai tea	Spicy Eye Opener Chai Rg	5.1	1	Jan	1	Mon	12
729	2023-01-02	12:26:13	2	5	Lower Manhattan	25	2.2	Coffee	Organic brewed coffee	Brazilian Sm	4.4	1	Jan	1	Mon	12
730	2023-01-02	12:26:13	1	5	Lower Manhattan	78	4.5	Bakery	Scone	Scottish Cream Scone	4.5	1	Jan	1	Mon	12
731	2023-01-02	12:26:18	1	8	Hell's Kitchen	28	2	Coffee	Gourmet brewed coffee	Columbian Medium Roast Sm	2	1	Jan	1	Mon	12
732	2023-01-02	12:27:01	1	8	Hell's Kitchen	60	3.75	Drinking Chocolate	Hot chocolate	Sustainably Grown Organic Rg	3.75	1	Jan	1	Mon	12
733	2023-01-02	12:28:08	2	3	Astoria	51	3	Tea	Brewed Black tea	Earl Grey Lg	6	1	Jan	1	Mon	12
734	2023-01-02	12:28:25	1	3	Astoria	60	3.75	Drinking Chocolate	Hot chocolate	Sustainably Grown Organic Rg	3.75	1	Jan	1	Mon	12
735	2023-01-02	12:29:07	1	3	Astoria	24	3	Coffee	Drip coffee	Our Old Time Diner Blend Lg	3	1	Jan	1	Mon	12
736	2023-01-02	12:30:43	2	3	Astoria	50	2.5	Tea	Brewed Black tea	Earl Grey Rg	5	1	Jan	1	Mon	12
737	2023-01-02	12:32:19	1	8	Hell's Kitchen	57	3.1	Tea	Brewed Chai tea	Spicy Eye Opener Chai Lg	3.1	1	Jan	1	Mon	12
738	2023-01-02	12:33:04	2	3	Astoria	32	3	Coffee	Gourmet brewed coffee	Ethiopia Rg	6	1	Jan	1	Mon	12
739	2023-01-02	12:34:00	1	3	Astoria	24	3	Coffee	Drip coffee	Our Old Time Diner Blend Lg	3	1	Jan	1	Mon	12
740	2023-01-02	12:36:06	1	8	Hell's Kitchen	43	3	Tea	Brewed herbal tea	Lemon Grass Lg	3	1	Jan	1	Mon	12
741	2023-01-02	12:36:37	1	5	Lower Manhattan	25	2.2	Coffee	Organic brewed coffee	Brazilian Sm	2.2	1	Jan	1	Mon	12
742	2023-01-02	12:38:47	2	8	Hell's Kitchen	87	3	Coffee	Barista Espresso	Ouro Brasileiro shot	6	1	Jan	1	Mon	12
743	2023-01-02	12:38:51	1	3	Astoria	56	2.55	Tea	Brewed Chai tea	Spicy Eye Opener Chai Rg	2.55	1	Jan	1	Mon	12
744	2023-01-02	12:39:04	2	5	Lower Manhattan	87	3	Coffee	Barista Espresso	Ouro Brasileiro shot	6	1	Jan	1	Mon	12
745	2023-01-02	12:41:28	1	8	Hell's Kitchen	87	3	Coffee	Barista Espresso	Ouro Brasileiro shot	3	1	Jan	1	Mon	12
746	2023-01-02	12:42:19	1	5	Lower Manhattan	52	2.5	Tea	Brewed Chai tea	Traditional Blend Chai Rg	2.5	1	Jan	1	Mon	12
747	2023-01-02	12:42:47	1	8	Hell's Kitchen	60	3.75	Drinking Chocolate	Hot chocolate	Sustainably Grown Organic Rg	3.75	1	Jan	1	Mon	12
748	2023-01-02	12:45:02	1	5	Lower Manhattan	26	3	Coffee	Organic brewed coffee	Brazilian Rg	3	1	Jan	1	Mon	12
749	2023-01-02	12:46:04	2	3	Astoria	46	2.5	Tea	Brewed Green tea	Serenity Green Tea Rg	5	1	Jan	1	Mon	12
750	2023-01-02	12:47:49	2	3	Astoria	46	2.5	Tea	Brewed Green tea	Serenity Green Tea Rg	5	1	Jan	1	Mon	12
751	2023-01-02	12:53:16	2	8	Hell's Kitchen	22	2	Coffee	Drip coffee	Our Old Time Diner Blend Sm	4	1	Jan	1	Mon	12
752	2023-01-02	12:54:07	1	5	Lower Manhattan	58	3.5	Drinking Chocolate	Hot chocolate	Dark chocolate Rg	3.5	1	Jan	1	Mon	12
753	2023-01-02	12:54:07	1	5	Lower Manhattan	77	3	Bakery	Scone	Oatmeal Scone	3	1	Jan	1	Mon	12
754	2023-01-02	12:54:53	2	5	Lower Manhattan	52	2.5	Tea	Brewed Chai tea	Traditional Blend Chai Rg	5	1	Jan	1	Mon	12
755	2023-01-02	12:55:19	1	3	Astoria	52	2.5	Tea	Brewed Chai tea	Traditional Blend Chai Rg	2.5	1	Jan	1	Mon	12
756	2023-01-02	12:57:55	2	8	Hell's Kitchen	30	3	Coffee	Gourmet brewed coffee	Columbian Medium Roast Lg	6	1	Jan	1	Mon	12
757	2023-01-02	12:58:04	2	3	Astoria	53	3	Tea	Brewed Chai tea	Traditional Blend Chai Lg	6	1	Jan	1	Mon	12
758	2023-01-02	12:58:38	2	8	Hell's Kitchen	26	3	Coffee	Organic brewed coffee	Brazilian Rg	6	1	Jan	1	Mon	12
759	2023-01-02	12:58:57	1	8	Hell's Kitchen	35	3.1	Coffee	Premium brewed coffee	Jamaican Coffee River Rg	3.1	1	Jan	1	Mon	12
760	2023-01-02	12:59:28	1	8	Hell's Kitchen	47	3	Tea	Brewed Green tea	Serenity Green Tea Lg	3	1	Jan	1	Mon	12
761	2023-01-02	12:59:45	2	3	Astoria	24	3	Coffee	Drip coffee	Our Old Time Diner Blend Lg	6	1	Jan	1	Mon	12
762	2023-01-02	13:02:03	2	3	Astoria	27	3.5	Coffee	Organic brewed coffee	Brazilian Lg	7	1	Jan	1	Mon	13
763	2023-01-02	13:03:14	2	8	Hell's Kitchen	40	3.75	Coffee	Barista Espresso	Cappuccino	7.5	1	Jan	1	Mon	13
764	2023-01-02	13:03:14	1	8	Hell's Kitchen	76	3.5	Bakery	Biscotti	Chocolate Chip Biscotti	3.5	1	Jan	1	Mon	13
765	2023-01-02	13:03:33	2	5	Lower Manhattan	22	2	Coffee	Drip coffee	Our Old Time Diner Blend Sm	4	1	Jan	1	Mon	13
766	2023-01-02	13:03:53	2	3	Astoria	28	2	Coffee	Gourmet brewed coffee	Columbian Medium Roast Sm	4	1	Jan	1	Mon	13
767	2023-01-02	13:04:02	1	8	Hell's Kitchen	49	3	Tea	Brewed Black tea	English Breakfast Lg	3	1	Jan	1	Mon	13
768	2023-01-02	13:04:56	2	3	Astoria	27	3.5	Coffee	Organic brewed coffee	Brazilian Lg	7	1	Jan	1	Mon	13
769	2023-01-02	13:05:41	1	3	Astoria	61	4.75	Drinking Chocolate	Hot chocolate	Sustainably Grown Organic Lg	4.75	1	Jan	1	Mon	13
770	2023-01-02	13:09:27	1	5	Lower Manhattan	51	3	Tea	Brewed Black tea	Earl Grey Lg	3	1	Jan	1	Mon	13
771	2023-01-02	13:09:27	1	5	Lower Manhattan	70	3.25	Bakery	Scone	Cranberry Scone	3.25	1	Jan	1	Mon	13
772	2023-01-02	13:10:17	1	8	Hell's Kitchen	33	3.5	Coffee	Gourmet brewed coffee	Ethiopia Lg	3.5	1	Jan	1	Mon	13
773	2023-01-02	13:10:17	1	8	Hell's Kitchen	78	4.5	Bakery	Scone	Scottish Cream Scone	4.5	1	Jan	1	Mon	13
774	2023-01-02	13:10:41	2	8	Hell's Kitchen	43	3	Tea	Brewed herbal tea	Lemon Grass Lg	6	1	Jan	1	Mon	13
775	2023-01-02	13:14:54	2	5	Lower Manhattan	31	2.2	Coffee	Gourmet brewed coffee	Ethiopia Sm	4.4	1	Jan	1	Mon	13
776	2023-01-02	13:15:40	1	5	Lower Manhattan	24	3	Coffee	Drip coffee	Our Old Time Diner Blend Lg	3	1	Jan	1	Mon	13
777	2023-01-02	13:21:09	2	3	Astoria	46	2.5	Tea	Brewed Green tea	Serenity Green Tea Rg	5	1	Jan	1	Mon	13
778	2023-01-02	13:21:23	2	8	Hell's Kitchen	50	2.5	Tea	Brewed Black tea	Earl Grey Rg	5	1	Jan	1	Mon	13
779	2023-01-02	13:23:18	2	3	Astoria	39	4.25	Coffee	Barista Espresso	Latte Rg	8.5	1	Jan	1	Mon	13
780	2023-01-02	13:23:38	1	3	Astoria	44	2.5	Tea	Brewed herbal tea	Peppermint Rg	2.5	1	Jan	1	Mon	13
781	2023-01-02	13:24:33	2	3	Astoria	31	2.2	Coffee	Gourmet brewed coffee	Ethiopia Sm	4.4	1	Jan	1	Mon	13
782	2023-01-02	13:25:02	1	8	Hell's Kitchen	57	3.1	Tea	Brewed Chai tea	Spicy Eye Opener Chai Lg	3.1	1	Jan	1	Mon	13
783	2023-01-02	13:26:47	1	3	Astoria	47	3	Tea	Brewed Green tea	Serenity Green Tea Lg	3	1	Jan	1	Mon	13
784	2023-01-02	13:28:24	2	8	Hell's Kitchen	44	2.5	Tea	Brewed herbal tea	Peppermint Rg	5	1	Jan	1	Mon	13
785	2023-01-02	13:29:51	1	3	Astoria	38	3.75	Coffee	Barista Espresso	Latte	3.75	1	Jan	1	Mon	13
786	2023-01-02	13:29:59	1	3	Astoria	56	2.55	Tea	Brewed Chai tea	Spicy Eye Opener Chai Rg	2.55	1	Jan	1	Mon	13
787	2023-01-02	13:30:00	2	3	Astoria	27	3.5	Coffee	Organic brewed coffee	Brazilian Lg	7	1	Jan	1	Mon	13
788	2023-01-02	13:30:00	1	3	Astoria	76	3.5	Bakery	Biscotti	Chocolate Chip Biscotti	3.5	1	Jan	1	Mon	13
789	2023-01-02	13:30:05	1	8	Hell's Kitchen	50	2.5	Tea	Brewed Black tea	Earl Grey Rg	2.5	1	Jan	1	Mon	13
790	2023-01-02	13:30:15	1	3	Astoria	30	3	Coffee	Gourmet brewed coffee	Columbian Medium Roast Lg	3	1	Jan	1	Mon	13
791	2023-01-02	13:30:30	2	3	Astoria	39	4.25	Coffee	Barista Espresso	Latte Rg	8.5	1	Jan	1	Mon	13
792	2023-01-02	13:30:30	1	8	Hell's Kitchen	31	2.2	Coffee	Gourmet brewed coffee	Ethiopia Sm	2.2	1	Jan	1	Mon	13
793	2023-01-02	13:34:02	1	8	Hell's Kitchen	23	2.5	Coffee	Drip coffee	Our Old Time Diner Blend Rg	2.5	1	Jan	1	Mon	13
794	2023-01-02	13:35:24	2	5	Lower Manhattan	32	3	Coffee	Gourmet brewed coffee	Ethiopia Rg	6	1	Jan	1	Mon	13
795	2023-01-02	13:35:24	2	8	Hell's Kitchen	30	3	Coffee	Gourmet brewed coffee	Columbian Medium Roast Lg	6	1	Jan	1	Mon	13
796	2023-01-02	13:39:11	2	3	Astoria	23	2.5	Coffee	Drip coffee	Our Old Time Diner Blend Rg	5	1	Jan	1	Mon	13
797	2023-01-02	13:40:11	1	3	Astoria	39	4.25	Coffee	Barista Espresso	Latte Rg	4.25	1	Jan	1	Mon	13
798	2023-01-02	13:40:36	2	8	Hell's Kitchen	47	3	Tea	Brewed Green tea	Serenity Green Tea Lg	6	1	Jan	1	Mon	13
799	2023-01-02	13:40:53	1	5	Lower Manhattan	48	2.5	Tea	Brewed Black tea	English Breakfast Rg	2.5	1	Jan	1	Mon	13
800	2023-01-02	13:40:53	1	5	Lower Manhattan	79	3.75	Bakery	Scone	Jumbo Savory Scone	3.75	1	Jan	1	Mon	13
801	2023-01-02	13:42:07	1	8	Hell's Kitchen	36	3.75	Coffee	Premium brewed coffee	Jamaican Coffee River Lg	3.75	1	Jan	1	Mon	13
802	2023-01-02	13:47:24	1	3	Astoria	28	2	Coffee	Gourmet brewed coffee	Columbian Medium Roast Sm	2	1	Jan	1	Mon	13
803	2023-01-02	13:47:27	2	8	Hell's Kitchen	59	4.5	Drinking Chocolate	Hot chocolate	Dark chocolate Lg	9	1	Jan	1	Mon	13
804	2023-01-02	13:48:27	2	8	Hell's Kitchen	26	3	Coffee	Organic brewed coffee	Brazilian Rg	6	1	Jan	1	Mon	13
805	2023-01-02	13:48:27	1	8	Hell's Kitchen	73	3.75	Bakery	Pastry	Almond Croissant	3.75	1	Jan	1	Mon	13
806	2023-01-02	13:51:33	1	3	Astoria	60	3.75	Drinking Chocolate	Hot chocolate	Sustainably Grown Organic Rg	3.75	1	Jan	1	Mon	13
807	2023-01-02	13:51:33	1	3	Astoria	70	3.25	Bakery	Scone	Cranberry Scone	3.25	1	Jan	1	Mon	13
808	2023-01-02	13:52:27	2	3	Astoria	54	2.5	Tea	Brewed Chai tea	Morning Sunrise Chai Rg	5	1	Jan	1	Mon	13
809	2023-01-02	13:53:04	1	8	Hell's Kitchen	26	3	Coffee	Organic brewed coffee	Brazilian Rg	3	1	Jan	1	Mon	13
810	2023-01-02	13:53:04	1	8	Hell's Kitchen	79	3.75	Bakery	Scone	Jumbo Savory Scone	3.75	1	Jan	1	Mon	13
811	2023-01-02	13:55:38	1	8	Hell's Kitchen	23	2.5	Coffee	Drip coffee	Our Old Time Diner Blend Rg	2.5	1	Jan	1	Mon	13
812	2023-01-02	13:55:38	1	8	Hell's Kitchen	71	3.75	Bakery	Pastry	Chocolate Croissant	3.75	1	Jan	1	Mon	13
813	2023-01-02	13:56:19	1	5	Lower Manhattan	39	4.25	Coffee	Barista Espresso	Latte Rg	4.25	1	Jan	1	Mon	13
814	2023-01-02	13:57:59	2	8	Hell's Kitchen	38	3.75	Coffee	Barista Espresso	Latte	7.5	1	Jan	1	Mon	13
815	2023-01-02	13:58:30	2	3	Astoria	36	3.75	Coffee	Premium brewed coffee	Jamaican Coffee River Lg	7.5	1	Jan	1	Mon	13
816	2023-01-02	13:58:36	1	3	Astoria	39	4.25	Coffee	Barista Espresso	Latte Rg	4.25	1	Jan	1	Mon	13
817	2023-01-02	14:01:23	1	8	Hell's Kitchen	46	2.5	Tea	Brewed Green tea	Serenity Green Tea Rg	2.5	1	Jan	1	Mon	14
818	2023-01-02	14:02:16	2	8	Hell's Kitchen	25	2.2	Coffee	Organic brewed coffee	Brazilian Sm	4.4	1	Jan	1	Mon	14
819	2023-01-02	14:02:44	2	3	Astoria	22	2	Coffee	Drip coffee	Our Old Time Diner Blend Sm	4	1	Jan	1	Mon	14
820	2023-01-02	14:03:27	1	3	Astoria	59	4.5	Drinking Chocolate	Hot chocolate	Dark chocolate Lg	4.5	1	Jan	1	Mon	14
821	2023-01-02	14:05:27	1	5	Lower Manhattan	56	2.55	Tea	Brewed Chai tea	Spicy Eye Opener Chai Rg	2.55	1	Jan	1	Mon	14
822	2023-01-02	14:05:27	1	5	Lower Manhattan	75	3.5	Bakery	Pastry	Croissant	3.5	1	Jan	1	Mon	14
823	2023-01-02	14:07:17	1	3	Astoria	37	3	Coffee	Barista Espresso	Espresso shot	3	1	Jan	1	Mon	14
824	2023-01-02	14:07:49	2	5	Lower Manhattan	60	3.75	Drinking Chocolate	Hot chocolate	Sustainably Grown Organic Rg	7.5	1	Jan	1	Mon	14
825	2023-01-02	14:08:49	1	3	Astoria	40	3.75	Coffee	Barista Espresso	Cappuccino	3.75	1	Jan	1	Mon	14
826	2023-01-02	14:11:08	1	5	Lower Manhattan	28	2	Coffee	Gourmet brewed coffee	Columbian Medium Roast Sm	2	1	Jan	1	Mon	14
827	2023-01-02	14:12:00	1	8	Hell's Kitchen	46	2.5	Tea	Brewed Green tea	Serenity Green Tea Rg	2.5	1	Jan	1	Mon	14
828	2023-01-02	14:12:07	2	5	Lower Manhattan	51	3	Tea	Brewed Black tea	Earl Grey Lg	6	1	Jan	1	Mon	14
829	2023-01-02	14:12:35	2	3	Astoria	54	2.5	Tea	Brewed Chai tea	Morning Sunrise Chai Rg	5	1	Jan	1	Mon	14
830	2023-01-02	14:12:35	1	3	Astoria	72	3.25	Bakery	Scone	Ginger Scone	3.25	1	Jan	1	Mon	14
831	2023-01-02	14:13:26	1	8	Hell's Kitchen	55	4	Tea	Brewed Chai tea	Morning Sunrise Chai Lg	4	1	Jan	1	Mon	14
832	2023-01-02	14:13:37	2	5	Lower Manhattan	25	2.2	Coffee	Organic brewed coffee	Brazilian Sm	4.4	1	Jan	1	Mon	14
833	2023-01-02	14:14:26	2	3	Astoria	58	3.5	Drinking Chocolate	Hot chocolate	Dark chocolate Rg	7	1	Jan	1	Mon	14
834	2023-01-02	14:17:08	1	3	Astoria	23	2.5	Coffee	Drip coffee	Our Old Time Diner Blend Rg	2.5	1	Jan	1	Mon	14
835	2023-01-02	14:17:55	2	3	Astoria	61	4.75	Drinking Chocolate	Hot chocolate	Sustainably Grown Organic Lg	9.5	1	Jan	1	Mon	14
836	2023-01-02	14:17:55	1	3	Astoria	75	3.5	Bakery	Pastry	Croissant	3.5	1	Jan	1	Mon	14
837	2023-01-02	14:19:24	1	3	Astoria	49	3	Tea	Brewed Black tea	English Breakfast Lg	3	1	Jan	1	Mon	14
838	2023-01-02	14:21:55	2	8	Hell's Kitchen	41	4.25	Coffee	Barista Espresso	Cappuccino Lg	8.5	1	Jan	1	Mon	14
839	2023-01-02	14:24:46	1	3	Astoria	30	3	Coffee	Gourmet brewed coffee	Columbian Medium Roast Lg	3	1	Jan	1	Mon	14
840	2023-01-02	14:25:35	1	8	Hell's Kitchen	31	2.2	Coffee	Gourmet brewed coffee	Ethiopia Sm	2.2	1	Jan	1	Mon	14
841	2023-01-02	14:26:33	1	8	Hell's Kitchen	36	3.75	Coffee	Premium brewed coffee	Jamaican Coffee River Lg	3.75	1	Jan	1	Mon	14
842	2023-01-02	14:29:35	2	3	Astoria	43	3	Tea	Brewed herbal tea	Lemon Grass Lg	6	1	Jan	1	Mon	14
843	2023-01-02	14:29:35	1	3	Astoria	71	3.75	Bakery	Pastry	Chocolate Croissant	3.75	1	Jan	1	Mon	14
844	2023-01-02	14:33:26	1	3	Astoria	22	2	Coffee	Drip coffee	Our Old Time Diner Blend Sm	2	1	Jan	1	Mon	14
845	2023-01-02	14:33:58	2	5	Lower Manhattan	37	3	Coffee	Barista Espresso	Espresso shot	6	1	Jan	1	Mon	14
846	2023-01-02	14:34:53	1	3	Astoria	48	2.5	Tea	Brewed Black tea	English Breakfast Rg	2.5	1	Jan	1	Mon	14
847	2023-01-02	14:36:56	2	5	Lower Manhattan	87	3	Coffee	Barista Espresso	Ouro Brasileiro shot	6	1	Jan	1	Mon	14
848	2023-01-02	14:37:44	2	8	Hell's Kitchen	52	2.5	Tea	Brewed Chai tea	Traditional Blend Chai Rg	5	1	Jan	1	Mon	14
849	2023-01-02	14:39:18	1	8	Hell's Kitchen	24	3	Coffee	Drip coffee	Our Old Time Diner Blend Lg	3	1	Jan	1	Mon	14
850	2023-01-02	14:40:25	2	3	Astoria	40	3.75	Coffee	Barista Espresso	Cappuccino	7.5	1	Jan	1	Mon	14
851	2023-01-02	14:42:21	1	3	Astoria	47	3	Tea	Brewed Green tea	Serenity Green Tea Lg	3	1	Jan	1	Mon	14
852	2023-01-02	14:42:21	1	3	Astoria	72	3.25	Bakery	Scone	Ginger Scone	3.25	1	Jan	1	Mon	14
853	2023-01-02	14:44:28	2	5	Lower Manhattan	52	2.5	Tea	Brewed Chai tea	Traditional Blend Chai Rg	5	1	Jan	1	Mon	14
854	2023-01-02	14:46:31	2	8	Hell's Kitchen	23	2.5	Coffee	Drip coffee	Our Old Time Diner Blend Rg	5	1	Jan	1	Mon	14
855	2023-01-02	14:48:02	2	5	Lower Manhattan	27	3.5	Coffee	Organic brewed coffee	Brazilian Lg	7	1	Jan	1	Mon	14
856	2023-01-02	14:48:05	1	5	Lower Manhattan	41	4.25	Coffee	Barista Espresso	Cappuccino Lg	4.25	1	Jan	1	Mon	14
857	2023-01-02	14:48:53	1	8	Hell's Kitchen	32	3	Coffee	Gourmet brewed coffee	Ethiopia Rg	3	1	Jan	1	Mon	14
858	2023-01-02	14:51:11	1	3	Astoria	36	3.75	Coffee	Premium brewed coffee	Jamaican Coffee River Lg	3.75	1	Jan	1	Mon	14
859	2023-01-02	14:52:26	1	5	Lower Manhattan	46	2.5	Tea	Brewed Green tea	Serenity Green Tea Rg	2.5	1	Jan	1	Mon	14
860	2023-01-02	14:52:26	1	5	Lower Manhattan	76	3.5	Bakery	Biscotti	Chocolate Chip Biscotti	3.5	1	Jan	1	Mon	14
861	2023-01-02	14:54:33	2	3	Astoria	37	3	Coffee	Barista Espresso	Espresso shot	6	1	Jan	1	Mon	14
862	2023-01-02	14:54:40	1	5	Lower Manhattan	87	3	Coffee	Barista Espresso	Ouro Brasileiro shot	3	1	Jan	1	Mon	14
863	2023-01-02	14:54:46	2	5	Lower Manhattan	52	2.5	Tea	Brewed Chai tea	Traditional Blend Chai Rg	5	1	Jan	1	Mon	14
864	2023-01-02	14:55:38	2	8	Hell's Kitchen	36	3.75	Coffee	Premium brewed coffee	Jamaican Coffee River Lg	7.5	1	Jan	1	Mon	14
865	2023-01-02	14:58:21	2	8	Hell's Kitchen	87	3	Coffee	Barista Espresso	Ouro Brasileiro shot	6	1	Jan	1	Mon	14
866	2023-01-02	14:58:28	2	8	Hell's Kitchen	46	2.5	Tea	Brewed Green tea	Serenity Green Tea Rg	5	1	Jan	1	Mon	14
867	2023-01-02	14:59:08	1	8	Hell's Kitchen	30	3	Coffee	Gourmet brewed coffee	Columbian Medium Roast Lg	3	1	Jan	1	Mon	14
868	2023-01-02	15:03:12	2	3	Astoria	26	3	Coffee	Organic brewed coffee	Brazilian Rg	6	1	Jan	1	Mon	15
869	2023-01-02	15:03:12	1	3	Astoria	73	3.75	Bakery	Pastry	Almond Croissant	3.75	1	Jan	1	Mon	15
870	2023-01-02	15:04:21	2	3	Astoria	23	2.5	Coffee	Drip coffee	Our Old Time Diner Blend Rg	5	1	Jan	1	Mon	15
871	2023-01-02	15:05:22	1	3	Astoria	27	3.5	Coffee	Organic brewed coffee	Brazilian Lg	3.5	1	Jan	1	Mon	15
872	2023-01-02	15:05:22	1	3	Astoria	79	3.75	Bakery	Scone	Jumbo Savory Scone	3.75	1	Jan	1	Mon	15
873	2023-01-02	15:09:48	2	5	Lower Manhattan	31	2.2	Coffee	Gourmet brewed coffee	Ethiopia Sm	4.4	1	Jan	1	Mon	15
874	2023-01-02	15:10:48	1	8	Hell's Kitchen	44	2.5	Tea	Brewed herbal tea	Peppermint Rg	2.5	1	Jan	1	Mon	15
875	2023-01-02	15:12:44	1	3	Astoria	52	2.5	Tea	Brewed Chai tea	Traditional Blend Chai Rg	2.5	1	Jan	1	Mon	15
876	2023-01-02	15:15:03	1	3	Astoria	40	3.75	Coffee	Barista Espresso	Cappuccino	3.75	1	Jan	1	Mon	15
877	2023-01-02	15:15:03	1	3	Astoria	77	3	Bakery	Scone	Oatmeal Scone	3	1	Jan	1	Mon	15
878	2023-01-02	15:18:41	1	5	Lower Manhattan	59	4.5	Drinking Chocolate	Hot chocolate	Dark chocolate Lg	4.5	1	Jan	1	Mon	15
879	2023-01-02	15:19:46	1	3	Astoria	53	3	Tea	Brewed Chai tea	Traditional Blend Chai Lg	3	1	Jan	1	Mon	15
880	2023-01-02	15:21:45	2	3	Astoria	47	3	Tea	Brewed Green tea	Serenity Green Tea Lg	6	1	Jan	1	Mon	15
881	2023-01-02	15:22:19	2	8	Hell's Kitchen	28	2	Coffee	Gourmet brewed coffee	Columbian Medium Roast Sm	4	1	Jan	1	Mon	15
882	2023-01-02	15:23:29	2	8	Hell's Kitchen	45	3	Tea	Brewed herbal tea	Peppermint Lg	6	1	Jan	1	Mon	15
883	2023-01-02	15:24:16	1	3	Astoria	60	3.75	Drinking Chocolate	Hot chocolate	Sustainably Grown Organic Rg	3.75	1	Jan	1	Mon	15
884	2023-01-02	15:24:52	2	5	Lower Manhattan	48	2.5	Tea	Brewed Black tea	English Breakfast Rg	5	1	Jan	1	Mon	15
885	2023-01-02	15:26:08	1	3	Astoria	50	2.5	Tea	Brewed Black tea	Earl Grey Rg	2.5	1	Jan	1	Mon	15
886	2023-01-02	15:26:22	2	5	Lower Manhattan	42	2.5	Tea	Brewed herbal tea	Lemon Grass Rg	5	1	Jan	1	Mon	15
887	2023-01-02	15:26:22	1	5	Lower Manhattan	69	3.25	Bakery	Biscotti	Hazelnut Biscotti	3.25	1	Jan	1	Mon	15
888	2023-01-02	15:27:43	1	3	Astoria	58	3.5	Drinking Chocolate	Hot chocolate	Dark chocolate Rg	3.5	1	Jan	1	Mon	15
889	2023-01-02	15:27:48	1	3	Astoria	41	4.25	Coffee	Barista Espresso	Cappuccino Lg	4.25	1	Jan	1	Mon	15
890	2023-01-02	15:28:35	2	5	Lower Manhattan	87	3	Coffee	Barista Espresso	Ouro Brasileiro shot	6	1	Jan	1	Mon	15
891	2023-01-02	15:29:31	2	5	Lower Manhattan	44	2.5	Tea	Brewed herbal tea	Peppermint Rg	5	1	Jan	1	Mon	15
892	2023-01-02	15:30:51	1	8	Hell's Kitchen	40	3.75	Coffee	Barista Espresso	Cappuccino	3.75	1	Jan	1	Mon	15
893	2023-01-02	15:32:44	2	8	Hell's Kitchen	45	3	Tea	Brewed herbal tea	Peppermint Lg	6	1	Jan	1	Mon	15
894	2023-01-02	15:34:44	2	5	Lower Manhattan	34	2.45	Coffee	Premium brewed coffee	Jamaican Coffee River Sm	4.9	1	Jan	1	Mon	15
895	2023-01-02	15:35:22	1	8	Hell's Kitchen	53	3	Tea	Brewed Chai tea	Traditional Blend Chai Lg	3	1	Jan	1	Mon	15
896	2023-01-02	15:35:22	1	8	Hell's Kitchen	69	3.25	Bakery	Biscotti	Hazelnut Biscotti	3.25	1	Jan	1	Mon	15
897	2023-01-02	15:35:30	2	5	Lower Manhattan	60	3.75	Drinking Chocolate	Hot chocolate	Sustainably Grown Organic Rg	7.5	1	Jan	1	Mon	15
898	2023-01-02	15:35:30	1	5	Lower Manhattan	70	3.25	Bakery	Scone	Cranberry Scone	3.25	1	Jan	1	Mon	15
899	2023-01-02	15:36:29	2	8	Hell's Kitchen	46	2.5	Tea	Brewed Green tea	Serenity Green Tea Rg	5	1	Jan	1	Mon	15
900	2023-01-02	15:36:47	2	3	Astoria	23	2.5	Coffee	Drip coffee	Our Old Time Diner Blend Rg	5	1	Jan	1	Mon	15
901	2023-01-02	15:37:20	2	8	Hell's Kitchen	33	3.5	Coffee	Gourmet brewed coffee	Ethiopia Lg	7	1	Jan	1	Mon	15
902	2023-01-02	15:37:20	1	8	Hell's Kitchen	69	3.25	Bakery	Biscotti	Hazelnut Biscotti	3.25	1	Jan	1	Mon	15
903	2023-01-02	15:38:44	2	5	Lower Manhattan	47	3	Tea	Brewed Green tea	Serenity Green Tea Lg	6	1	Jan	1	Mon	15
904	2023-01-02	15:41:09	1	8	Hell's Kitchen	52	2.5	Tea	Brewed Chai tea	Traditional Blend Chai Rg	2.5	1	Jan	1	Mon	15
905	2023-01-02	15:41:09	1	8	Hell's Kitchen	69	3.25	Bakery	Biscotti	Hazelnut Biscotti	3.25	1	Jan	1	Mon	15
906	2023-01-02	15:41:55	2	5	Lower Manhattan	47	3	Tea	Brewed Green tea	Serenity Green Tea Lg	6	1	Jan	1	Mon	15
907	2023-01-02	15:41:55	1	5	Lower Manhattan	74	3.5	Bakery	Biscotti	Ginger Biscotti	3.5	1	Jan	1	Mon	15
908	2023-01-02	15:42:50	1	8	Hell's Kitchen	23	2.5	Coffee	Drip coffee	Our Old Time Diner Blend Rg	2.5	1	Jan	1	Mon	15
909	2023-01-02	15:44:59	2	3	Astoria	44	2.5	Tea	Brewed herbal tea	Peppermint Rg	5	1	Jan	1	Mon	15
910	2023-01-02	15:48:55	1	5	Lower Manhattan	46	2.5	Tea	Brewed Green tea	Serenity Green Tea Rg	2.5	1	Jan	1	Mon	15
911	2023-01-02	15:48:55	1	5	Lower Manhattan	73	3.75	Bakery	Pastry	Almond Croissant	3.75	1	Jan	1	Mon	15
912	2023-01-02	15:49:27	1	5	Lower Manhattan	42	2.5	Tea	Brewed herbal tea	Lemon Grass Rg	2.5	1	Jan	1	Mon	15
913	2023-01-02	15:49:27	1	5	Lower Manhattan	78	4.5	Bakery	Scone	Scottish Cream Scone	4.5	1	Jan	1	Mon	15
914	2023-01-02	15:50:12	2	3	Astoria	54	2.5	Tea	Brewed Chai tea	Morning Sunrise Chai Rg	5	1	Jan	1	Mon	15
915	2023-01-02	15:50:12	1	3	Astoria	79	3.75	Bakery	Scone	Jumbo Savory Scone	3.75	1	Jan	1	Mon	15
916	2023-01-02	15:50:27	2	5	Lower Manhattan	47	3	Tea	Brewed Green tea	Serenity Green Tea Lg	6	1	Jan	1	Mon	15
917	2023-01-02	15:50:28	2	8	Hell's Kitchen	46	2.5	Tea	Brewed Green tea	Serenity Green Tea Rg	5	1	Jan	1	Mon	15
918	2023-01-02	15:51:29	1	5	Lower Manhattan	34	2.45	Coffee	Premium brewed coffee	Jamaican Coffee River Sm	2.45	1	Jan	1	Mon	15
919	2023-01-02	15:51:57	2	5	Lower Manhattan	38	3.75	Coffee	Barista Espresso	Latte	7.5	1	Jan	1	Mon	15
920	2023-01-02	15:52:14	2	5	Lower Manhattan	34	2.45	Coffee	Premium brewed coffee	Jamaican Coffee River Sm	4.9	1	Jan	1	Mon	15
921	2023-01-02	15:52:58	1	8	Hell's Kitchen	56	2.55	Tea	Brewed Chai tea	Spicy Eye Opener Chai Rg	2.55	1	Jan	1	Mon	15
922	2023-01-02	15:54:43	2	8	Hell's Kitchen	28	2	Coffee	Gourmet brewed coffee	Columbian Medium Roast Sm	4	1	Jan	1	Mon	15
923	2023-01-02	15:55:19	1	5	Lower Manhattan	55	4	Tea	Brewed Chai tea	Morning Sunrise Chai Lg	4	1	Jan	1	Mon	15
924	2023-01-02	15:55:19	1	5	Lower Manhattan	79	3.75	Bakery	Scone	Jumbo Savory Scone	3.75	1	Jan	1	Mon	15
925	2023-01-02	15:55:27	2	5	Lower Manhattan	56	2.55	Tea	Brewed Chai tea	Spicy Eye Opener Chai Rg	5.1	1	Jan	1	Mon	15
926	2023-01-02	15:56:41	1	8	Hell's Kitchen	48	2.5	Tea	Brewed Black tea	English Breakfast Rg	2.5	1	Jan	1	Mon	15
927	2023-01-02	15:58:07	2	5	Lower Manhattan	29	2.5	Coffee	Gourmet brewed coffee	Columbian Medium Roast Rg	5	1	Jan	1	Mon	15
928	2023-01-02	15:59:37	1	3	Astoria	58	3.5	Drinking Chocolate	Hot chocolate	Dark chocolate Rg	3.5	1	Jan	1	Mon	15
929	2023-01-02	15:59:53	2	3	Astoria	43	3	Tea	Brewed herbal tea	Lemon Grass Lg	6	1	Jan	1	Mon	15
930	2023-01-02	16:00:33	2	3	Astoria	51	3	Tea	Brewed Black tea	Earl Grey Lg	6	1	Jan	1	Mon	16
931	2023-01-02	16:00:33	1	3	Astoria	78	4.5	Bakery	Scone	Scottish Cream Scone	4.5	1	Jan	1	Mon	16
932	2023-01-02	16:02:09	1	5	Lower Manhattan	40	3.75	Coffee	Barista Espresso	Cappuccino	3.75	1	Jan	1	Mon	16
933	2023-01-02	16:02:21	1	5	Lower Manhattan	44	2.5	Tea	Brewed herbal tea	Peppermint Rg	2.5	1	Jan	1	Mon	16
934	2023-01-02	16:05:18	1	5	Lower Manhattan	52	2.5	Tea	Brewed Chai tea	Traditional Blend Chai Rg	2.5	1	Jan	1	Mon	16
935	2023-01-02	16:06:01	2	5	Lower Manhattan	34	2.45	Coffee	Premium brewed coffee	Jamaican Coffee River Sm	4.9	1	Jan	1	Mon	16
936	2023-01-02	16:06:18	1	3	Astoria	39	4.25	Coffee	Barista Espresso	Latte Rg	4.25	1	Jan	1	Mon	16
937	2023-01-02	16:08:22	1	5	Lower Manhattan	54	2.5	Tea	Brewed Chai tea	Morning Sunrise Chai Rg	2.5	1	Jan	1	Mon	16
938	2023-01-02	16:09:17	1	3	Astoria	39	4.25	Coffee	Barista Espresso	Latte Rg	4.25	1	Jan	1	Mon	16
939	2023-01-02	16:09:45	2	3	Astoria	45	3	Tea	Brewed herbal tea	Peppermint Lg	6	1	Jan	1	Mon	16
940	2023-01-02	16:11:04	1	3	Astoria	40	3.75	Coffee	Barista Espresso	Cappuccino	3.75	1	Jan	1	Mon	16
941	2023-01-02	16:11:57	2	8	Hell's Kitchen	26	3	Coffee	Organic brewed coffee	Brazilian Rg	6	1	Jan	1	Mon	16
942	2023-01-02	16:12:01	2	8	Hell's Kitchen	47	3	Tea	Brewed Green tea	Serenity Green Tea Lg	6	1	Jan	1	Mon	16
943	2023-01-02	16:14:09	1	5	Lower Manhattan	30	3	Coffee	Gourmet brewed coffee	Columbian Medium Roast Lg	3	1	Jan	1	Mon	16
944	2023-01-02	16:14:09	1	5	Lower Manhattan	78	4.5	Bakery	Scone	Scottish Cream Scone	4.5	1	Jan	1	Mon	16
945	2023-01-02	16:18:15	2	3	Astoria	53	3	Tea	Brewed Chai tea	Traditional Blend Chai Lg	6	1	Jan	1	Mon	16
946	2023-01-02	16:19:33	1	3	Astoria	38	3.75	Coffee	Barista Espresso	Latte	3.75	1	Jan	1	Mon	16
947	2023-01-02	16:19:48	2	5	Lower Manhattan	60	3.75	Drinking Chocolate	Hot chocolate	Sustainably Grown Organic Rg	7.5	1	Jan	1	Mon	16
948	2023-01-02	16:19:48	1	5	Lower Manhattan	78	4.5	Bakery	Scone	Scottish Cream Scone	4.5	1	Jan	1	Mon	16
949	2023-01-02	16:22:25	1	3	Astoria	48	2.5	Tea	Brewed Black tea	English Breakfast Rg	2.5	1	Jan	1	Mon	16
950	2023-01-02	16:22:30	2	3	Astoria	27	3.5	Coffee	Organic brewed coffee	Brazilian Lg	7	1	Jan	1	Mon	16
951	2023-01-02	16:23:50	1	5	Lower Manhattan	26	3	Coffee	Organic brewed coffee	Brazilian Rg	3	1	Jan	1	Mon	16
952	2023-01-02	16:26:14	1	3	Astoria	55	4	Tea	Brewed Chai tea	Morning Sunrise Chai Lg	4	1	Jan	1	Mon	16
953	2023-01-02	16:26:38	1	3	Astoria	25	2.2	Coffee	Organic brewed coffee	Brazilian Sm	2.2	1	Jan	1	Mon	16
954	2023-01-02	16:26:38	1	3	Astoria	73	3.75	Bakery	Pastry	Almond Croissant	3.75	1	Jan	1	Mon	16
955	2023-01-02	16:26:49	1	8	Hell's Kitchen	54	2.5	Tea	Brewed Chai tea	Morning Sunrise Chai Rg	2.5	1	Jan	1	Mon	16
956	2023-01-02	16:28:26	1	8	Hell's Kitchen	36	3.75	Coffee	Premium brewed coffee	Jamaican Coffee River Lg	3.75	1	Jan	1	Mon	16
957	2023-01-02	16:30:05	1	5	Lower Manhattan	23	2.5	Coffee	Drip coffee	Our Old Time Diner Blend Rg	2.5	1	Jan	1	Mon	16
958	2023-01-02	16:30:07	1	3	Astoria	24	3	Coffee	Drip coffee	Our Old Time Diner Blend Lg	3	1	Jan	1	Mon	16
959	2023-01-02	16:30:07	1	3	Astoria	74	3.5	Bakery	Biscotti	Ginger Biscotti	3.5	1	Jan	1	Mon	16
960	2023-01-02	16:30:37	2	8	Hell's Kitchen	53	3	Tea	Brewed Chai tea	Traditional Blend Chai Lg	6	1	Jan	1	Mon	16
961	2023-01-02	16:31:20	2	3	Astoria	36	3.75	Coffee	Premium brewed coffee	Jamaican Coffee River Lg	7.5	1	Jan	1	Mon	16
962	2023-01-02	16:31:48	1	8	Hell's Kitchen	52	2.5	Tea	Brewed Chai tea	Traditional Blend Chai Rg	2.5	1	Jan	1	Mon	16
963	2023-01-02	16:32:14	2	3	Astoria	52	2.5	Tea	Brewed Chai tea	Traditional Blend Chai Rg	5	1	Jan	1	Mon	16
964	2023-01-02	16:32:25	2	5	Lower Manhattan	50	2.5	Tea	Brewed Black tea	Earl Grey Rg	5	1	Jan	1	Mon	16
965	2023-01-02	16:33:17	1	5	Lower Manhattan	57	3.1	Tea	Brewed Chai tea	Spicy Eye Opener Chai Lg	3.1	1	Jan	1	Mon	16
966	2023-01-02	16:33:17	1	5	Lower Manhattan	75	3.5	Bakery	Pastry	Croissant	3.5	1	Jan	1	Mon	16
967	2023-01-02	16:34:50	1	5	Lower Manhattan	50	2.5	Tea	Brewed Black tea	Earl Grey Rg	2.5	1	Jan	1	Mon	16
968	2023-01-02	16:35:22	1	3	Astoria	31	2.2	Coffee	Gourmet brewed coffee	Ethiopia Sm	2.2	1	Jan	1	Mon	16
969	2023-01-02	16:35:22	2	3	Astoria	54	2.5	Tea	Brewed Chai tea	Morning Sunrise Chai Rg	5	1	Jan	1	Mon	16
970	2023-01-02	16:35:54	2	8	Hell's Kitchen	49	3	Tea	Brewed Black tea	English Breakfast Lg	6	1	Jan	1	Mon	16
971	2023-01-02	16:36:38	1	3	Astoria	32	3	Coffee	Gourmet brewed coffee	Ethiopia Rg	3	1	Jan	1	Mon	16
972	2023-01-02	16:41:26	2	5	Lower Manhattan	22	2	Coffee	Drip coffee	Our Old Time Diner Blend Sm	4	1	Jan	1	Mon	16
973	2023-01-02	16:42:11	2	3	Astoria	51	3	Tea	Brewed Black tea	Earl Grey Lg	6	1	Jan	1	Mon	16
974	2023-01-02	16:42:33	1	5	Lower Manhattan	34	2.45	Coffee	Premium brewed coffee	Jamaican Coffee River Sm	2.45	1	Jan	1	Mon	16
975	2023-01-02	16:42:33	1	5	Lower Manhattan	77	3	Bakery	Scone	Oatmeal Scone	3	1	Jan	1	Mon	16
976	2023-01-02	16:43:04	2	3	Astoria	34	2.45	Coffee	Premium brewed coffee	Jamaican Coffee River Sm	4.9	1	Jan	1	Mon	16
977	2023-01-02	16:44:55	2	5	Lower Manhattan	32	3	Coffee	Gourmet brewed coffee	Ethiopia Rg	6	1	Jan	1	Mon	16
978	2023-01-02	16:47:01	1	3	Astoria	48	2.5	Tea	Brewed Black tea	English Breakfast Rg	2.5	1	Jan	1	Mon	16
979	2023-01-02	16:49:41	1	3	Astoria	49	3	Tea	Brewed Black tea	English Breakfast Lg	3	1	Jan	1	Mon	16
980	2023-01-02	16:50:14	1	8	Hell's Kitchen	25	2.2	Coffee	Organic brewed coffee	Brazilian Sm	2.2	1	Jan	1	Mon	16
981	2023-01-02	16:51:09	2	3	Astoria	34	2.45	Coffee	Premium brewed coffee	Jamaican Coffee River Sm	4.9	1	Jan	1	Mon	16
982	2023-01-02	16:51:09	1	3	Astoria	72	3.25	Bakery	Scone	Ginger Scone	3.25	1	Jan	1	Mon	16
983	2023-01-02	16:55:58	2	3	Astoria	24	3	Coffee	Drip coffee	Our Old Time Diner Blend Lg	6	1	Jan	1	Mon	16
984	2023-01-02	16:56:14	1	8	Hell's Kitchen	41	4.25	Coffee	Barista Espresso	Cappuccino Lg	4.25	1	Jan	1	Mon	16
985	2023-01-02	16:59:09	1	5	Lower Manhattan	23	2.5	Coffee	Drip coffee	Our Old Time Diner Blend Rg	2.5	1	Jan	1	Mon	16
986	2023-01-02	17:00:52	1	8	Hell's Kitchen	25	2.2	Coffee	Organic brewed coffee	Brazilian Sm	2.2	1	Jan	1	Mon	17
987	2023-01-02	17:02:06	1	8	Hell's Kitchen	50	2.5	Tea	Brewed Black tea	Earl Grey Rg	2.5	1	Jan	1	Mon	17
988	2023-01-02	17:02:59	2	5	Lower Manhattan	29	2.5	Coffee	Gourmet brewed coffee	Columbian Medium Roast Rg	5	1	Jan	1	Mon	17
989	2023-01-02	17:02:59	1	5	Lower Manhattan	77	3	Bakery	Scone	Oatmeal Scone	3	1	Jan	1	Mon	17
990	2023-01-02	17:04:56	1	3	Astoria	60	3.75	Drinking Chocolate	Hot chocolate	Sustainably Grown Organic Rg	3.75	1	Jan	1	Mon	17
991	2023-01-02	17:10:24	2	8	Hell's Kitchen	55	4	Tea	Brewed Chai tea	Morning Sunrise Chai Lg	8	1	Jan	1	Mon	17
992	2023-01-02	17:10:36	1	8	Hell's Kitchen	33	3.5	Coffee	Gourmet brewed coffee	Ethiopia Lg	3.5	1	Jan	1	Mon	17
993	2023-01-02	17:12:45	2	3	Astoria	42	2.5	Tea	Brewed herbal tea	Lemon Grass Rg	5	1	Jan	1	Mon	17
994	2023-01-02	17:13:53	1	8	Hell's Kitchen	43	3	Tea	Brewed herbal tea	Lemon Grass Lg	3	1	Jan	1	Mon	17
995	2023-01-02	17:15:28	2	5	Lower Manhattan	27	3.5	Coffee	Organic brewed coffee	Brazilian Lg	7	1	Jan	1	Mon	17
996	2023-01-02	17:15:35	2	5	Lower Manhattan	57	3.1	Tea	Brewed Chai tea	Spicy Eye Opener Chai Lg	6.2	1	Jan	1	Mon	17
997	2023-01-02	17:17:00	2	3	Astoria	53	3	Tea	Brewed Chai tea	Traditional Blend Chai Lg	6	1	Jan	1	Mon	17
998	2023-01-02	17:17:00	1	3	Astoria	70	3.25	Bakery	Scone	Cranberry Scone	3.25	1	Jan	1	Mon	17
999	2023-01-02	17:18:25	2	5	Lower Manhattan	32	3	Coffee	Gourmet brewed coffee	Ethiopia Rg	6	1	Jan	1	Mon	17
1000	2023-01-02	17:19:03	1	8	Hell's Kitchen	54	2.5	Tea	Brewed Chai tea	Morning Sunrise Chai Rg	2.5	1	Jan	1	Mon	17
1001	2023-01-02	17:19:40	1	5	Lower Manhattan	27	3.5	Coffee	Organic brewed coffee	Brazilian Lg	3.5	1	Jan	1	Mon	17
1002	2023-01-02	17:19:40	1	5	Lower Manhattan	74	3.5	Bakery	Biscotti	Ginger Biscotti	3.5	1	Jan	1	Mon	17
1003	2023-01-02	17:20:14	1	8	Hell's Kitchen	46	2.5	Tea	Brewed Green tea	Serenity Green Tea Rg	2.5	1	Jan	1	Mon	17
1004	2023-01-02	17:21:01	1	3	Astoria	28	2	Coffee	Gourmet brewed coffee	Columbian Medium Roast Sm	2	1	Jan	1	Mon	17
1005	2023-01-02	17:21:19	2	3	Astoria	24	3	Coffee	Drip coffee	Our Old Time Diner Blend Lg	6	1	Jan	1	Mon	17
1006	2023-01-02	17:28:06	1	8	Hell's Kitchen	47	3	Tea	Brewed Green tea	Serenity Green Tea Lg	3	1	Jan	1	Mon	17
1007	2023-01-02	17:28:13	1	8	Hell's Kitchen	29	2.5	Coffee	Gourmet brewed coffee	Columbian Medium Roast Rg	2.5	1	Jan	1	Mon	17
1008	2023-01-02	17:29:21	2	3	Astoria	46	2.5	Tea	Brewed Green tea	Serenity Green Tea Rg	5	1	Jan	1	Mon	17
1009	2023-01-02	17:29:41	1	3	Astoria	30	3	Coffee	Gourmet brewed coffee	Columbian Medium Roast Lg	3	1	Jan	1	Mon	17
1010	2023-01-02	17:29:42	1	8	Hell's Kitchen	44	2.5	Tea	Brewed herbal tea	Peppermint Rg	2.5	1	Jan	1	Mon	17
1011	2023-01-02	17:29:42	1	8	Hell's Kitchen	71	3.75	Bakery	Pastry	Chocolate Croissant	3.75	1	Jan	1	Mon	17
1012	2023-01-02	17:34:05	2	8	Hell's Kitchen	28	2	Coffee	Gourmet brewed coffee	Columbian Medium Roast Sm	4	1	Jan	1	Mon	17
1013	2023-01-02	17:35:03	2	3	Astoria	29	2.5	Coffee	Gourmet brewed coffee	Columbian Medium Roast Rg	5	1	Jan	1	Mon	17
1014	2023-01-02	17:35:40	2	3	Astoria	51	3	Tea	Brewed Black tea	Earl Grey Lg	6	1	Jan	1	Mon	17
1015	2023-01-02	17:38:25	1	3	Astoria	26	3	Coffee	Organic brewed coffee	Brazilian Rg	3	1	Jan	1	Mon	17
1016	2023-01-02	17:38:48	1	5	Lower Manhattan	57	3.1	Tea	Brewed Chai tea	Spicy Eye Opener Chai Lg	3.1	1	Jan	1	Mon	17
1017	2023-01-02	17:40:19	1	3	Astoria	60	3.75	Drinking Chocolate	Hot chocolate	Sustainably Grown Organic Rg	3.75	1	Jan	1	Mon	17
1018	2023-01-02	17:40:19	1	3	Astoria	73	3.75	Bakery	Pastry	Almond Croissant	3.75	1	Jan	1	Mon	17
1019	2023-01-02	17:41:03	2	3	Astoria	38	3.75	Coffee	Barista Espresso	Latte	7.5	1	Jan	1	Mon	17
1020	2023-01-02	17:42:18	1	3	Astoria	27	3.5	Coffee	Organic brewed coffee	Brazilian Lg	3.5	1	Jan	1	Mon	17
1021	2023-01-02	17:43:03	1	8	Hell's Kitchen	52	2.5	Tea	Brewed Chai tea	Traditional Blend Chai Rg	2.5	1	Jan	1	Mon	17
1022	2023-01-02	17:43:20	1	3	Astoria	61	4.75	Drinking Chocolate	Hot chocolate	Sustainably Grown Organic Lg	4.75	1	Jan	1	Mon	17
1023	2023-01-02	17:44:03	2	8	Hell's Kitchen	36	3.75	Coffee	Premium brewed coffee	Jamaican Coffee River Lg	7.5	1	Jan	1	Mon	17
1024	2023-01-02	17:45:16	1	8	Hell's Kitchen	46	2.5	Tea	Brewed Green tea	Serenity Green Tea Rg	2.5	1	Jan	1	Mon	17
1025	2023-01-02	17:45:27	1	8	Hell's Kitchen	52	2.5	Tea	Brewed Chai tea	Traditional Blend Chai Rg	2.5	1	Jan	1	Mon	17
1026	2023-01-02	17:48:34	2	3	Astoria	57	3.1	Tea	Brewed Chai tea	Spicy Eye Opener Chai Lg	6.2	1	Jan	1	Mon	17
1027	2023-01-02	17:48:39	2	5	Lower Manhattan	27	3.5	Coffee	Organic brewed coffee	Brazilian Lg	7	1	Jan	1	Mon	17
1028	2023-01-02	17:48:48	2	3	Astoria	52	2.5	Tea	Brewed Chai tea	Traditional Blend Chai Rg	5	1	Jan	1	Mon	17
1029	2023-01-02	17:51:00	2	3	Astoria	52	2.5	Tea	Brewed Chai tea	Traditional Blend Chai Rg	5	1	Jan	1	Mon	17
1030	2023-01-02	17:51:00	1	3	Astoria	76	3.5	Bakery	Biscotti	Chocolate Chip Biscotti	3.5	1	Jan	1	Mon	17
1031	2023-01-02	17:53:21	2	8	Hell's Kitchen	52	2.5	Tea	Brewed Chai tea	Traditional Blend Chai Rg	5	1	Jan	1	Mon	17
1032	2023-01-02	17:54:37	2	3	Astoria	37	3	Coffee	Barista Espresso	Espresso shot	6	1	Jan	1	Mon	17
1033	2023-01-02	17:54:59	2	3	Astoria	47	3	Tea	Brewed Green tea	Serenity Green Tea Lg	6	1	Jan	1	Mon	17
1034	2023-01-02	17:54:59	1	3	Astoria	74	3.5	Bakery	Biscotti	Ginger Biscotti	3.5	1	Jan	1	Mon	17
1035	2023-01-02	17:55:15	1	8	Hell's Kitchen	30	3	Coffee	Gourmet brewed coffee	Columbian Medium Roast Lg	3	1	Jan	1	Mon	17
1036	2023-01-02	17:57:42	2	3	Astoria	29	2.5	Coffee	Gourmet brewed coffee	Columbian Medium Roast Rg	5	1	Jan	1	Mon	17
1037	2023-01-02	17:57:42	1	3	Astoria	73	3.75	Bakery	Pastry	Almond Croissant	3.75	1	Jan	1	Mon	17
1038	2023-01-02	17:57:59	2	3	Astoria	60	3.75	Drinking Chocolate	Hot chocolate	Sustainably Grown Organic Rg	7.5	1	Jan	1	Mon	17
1039	2023-01-02	17:57:59	1	3	Astoria	75	3.5	Bakery	Pastry	Croissant	3.5	1	Jan	1	Mon	17
1040	2023-01-02	18:05:46	1	8	Hell's Kitchen	32	3	Coffee	Gourmet brewed coffee	Ethiopia Rg	3	1	Jan	1	Mon	18
1041	2023-01-02	18:05:46	1	8	Hell's Kitchen	72	3.25	Bakery	Scone	Ginger Scone	3.25	1	Jan	1	Mon	18
1042	2023-01-02	18:06:18	1	5	Lower Manhattan	61	4.75	Drinking Chocolate	Hot chocolate	Sustainably Grown Organic Lg	4.75	1	Jan	1	Mon	18
1043	2023-01-02	18:11:56	1	5	Lower Manhattan	55	4	Tea	Brewed Chai tea	Morning Sunrise Chai Lg	4	1	Jan	1	Mon	18
1044	2023-01-02	18:17:00	2	5	Lower Manhattan	33	3.5	Coffee	Gourmet brewed coffee	Ethiopia Lg	7	1	Jan	1	Mon	18
1045	2023-01-02	18:17:00	1	5	Lower Manhattan	73	3.75	Bakery	Pastry	Almond Croissant	3.75	1	Jan	1	Mon	18
1046	2023-01-02	18:17:58	2	5	Lower Manhattan	39	4.25	Coffee	Barista Espresso	Latte Rg	8.5	1	Jan	1	Mon	18
1047	2023-01-02	18:18:05	2	3	Astoria	45	3	Tea	Brewed herbal tea	Peppermint Lg	6	1	Jan	1	Mon	18
1048	2023-01-02	18:18:34	1	8	Hell's Kitchen	55	4	Tea	Brewed Chai tea	Morning Sunrise Chai Lg	4	1	Jan	1	Mon	18
1049	2023-01-02	18:19:05	1	3	Astoria	51	3	Tea	Brewed Black tea	Earl Grey Lg	3	1	Jan	1	Mon	18
1050	2023-01-02	18:22:30	1	5	Lower Manhattan	31	2.2	Coffee	Gourmet brewed coffee	Ethiopia Sm	2.2	1	Jan	1	Mon	18
1051	2023-01-02	18:23:01	2	8	Hell's Kitchen	50	2.5	Tea	Brewed Black tea	Earl Grey Rg	5	1	Jan	1	Mon	18
1052	2023-01-02	18:23:32	2	8	Hell's Kitchen	33	3.5	Coffee	Gourmet brewed coffee	Ethiopia Lg	7	1	Jan	1	Mon	18
1053	2023-01-02	18:24:11	2	3	Astoria	35	3.1	Coffee	Premium brewed coffee	Jamaican Coffee River Rg	6.2	1	Jan	1	Mon	18
1054	2023-01-02	18:24:23	2	8	Hell's Kitchen	34	2.45	Coffee	Premium brewed coffee	Jamaican Coffee River Sm	4.9	1	Jan	1	Mon	18
1055	2023-01-02	18:26:40	1	8	Hell's Kitchen	32	3	Coffee	Gourmet brewed coffee	Ethiopia Rg	3	1	Jan	1	Mon	18
1056	2023-01-02	18:27:04	1	3	Astoria	56	2.55	Tea	Brewed Chai tea	Spicy Eye Opener Chai Rg	2.55	1	Jan	1	Mon	18
1057	2023-01-02	18:28:05	2	3	Astoria	26	3	Coffee	Organic brewed coffee	Brazilian Rg	6	1	Jan	1	Mon	18
1058	2023-01-02	18:29:53	1	5	Lower Manhattan	34	2.45	Coffee	Premium brewed coffee	Jamaican Coffee River Sm	2.45	1	Jan	1	Mon	18
1059	2023-01-02	18:30:06	2	3	Astoria	36	3.75	Coffee	Premium brewed coffee	Jamaican Coffee River Lg	7.5	1	Jan	1	Mon	18
1060	2023-01-02	18:30:06	1	3	Astoria	75	3.5	Bakery	Pastry	Croissant	3.5	1	Jan	1	Mon	18
1061	2023-01-02	18:31:49	2	8	Hell's Kitchen	33	3.5	Coffee	Gourmet brewed coffee	Ethiopia Lg	7	1	Jan	1	Mon	18
1062	2023-01-02	18:31:49	1	8	Hell's Kitchen	70	3.25	Bakery	Scone	Cranberry Scone	3.25	1	Jan	1	Mon	18
1063	2023-01-02	18:31:50	2	3	Astoria	39	4.25	Coffee	Barista Espresso	Latte Rg	8.5	1	Jan	1	Mon	18
1064	2023-01-02	18:32:38	2	3	Astoria	49	3	Tea	Brewed Black tea	English Breakfast Lg	6	1	Jan	1	Mon	18
1065	2023-01-02	18:33:43	1	3	Astoria	44	2.5	Tea	Brewed herbal tea	Peppermint Rg	2.5	1	Jan	1	Mon	18
1066	2023-01-02	18:33:43	1	3	Astoria	77	3	Bakery	Scone	Oatmeal Scone	3	1	Jan	1	Mon	18
1067	2023-01-02	18:33:59	1	3	Astoria	46	2.5	Tea	Brewed Green tea	Serenity Green Tea Rg	2.5	1	Jan	1	Mon	18
1068	2023-01-02	18:37:31	1	3	Astoria	30	3	Coffee	Gourmet brewed coffee	Columbian Medium Roast Lg	3	1	Jan	1	Mon	18
1069	2023-01-02	18:39:18	1	3	Astoria	60	3.75	Drinking Chocolate	Hot chocolate	Sustainably Grown Organic Rg	3.75	1	Jan	1	Mon	18
1070	2023-01-02	18:40:50	2	8	Hell's Kitchen	61	4.75	Drinking Chocolate	Hot chocolate	Sustainably Grown Organic Lg	9.5	1	Jan	1	Mon	18
1071	2023-01-02	18:42:49	1	3	Astoria	37	3	Coffee	Barista Espresso	Espresso shot	3	1	Jan	1	Mon	18
1072	2023-01-02	18:43:00	1	3	Astoria	36	3.75	Coffee	Premium brewed coffee	Jamaican Coffee River Lg	3.75	1	Jan	1	Mon	18
1073	2023-01-02	18:44:51	2	3	Astoria	55	4	Tea	Brewed Chai tea	Morning Sunrise Chai Lg	8	1	Jan	1	Mon	18
1074	2023-01-02	18:49:22	2	3	Astoria	58	3.5	Drinking Chocolate	Hot chocolate	Dark chocolate Rg	7	1	Jan	1	Mon	18
1075	2023-01-02	18:49:22	1	3	Astoria	77	3	Bakery	Scone	Oatmeal Scone	3	1	Jan	1	Mon	18
1076	2023-01-02	18:50:17	1	3	Astoria	46	2.5	Tea	Brewed Green tea	Serenity Green Tea Rg	2.5	1	Jan	1	Mon	18
1077	2023-01-02	18:50:17	1	3	Astoria	76	3.5	Bakery	Biscotti	Chocolate Chip Biscotti	3.5	1	Jan	1	Mon	18
1078	2023-01-02	18:53:56	2	3	Astoria	52	2.5	Tea	Brewed Chai tea	Traditional Blend Chai Rg	5	1	Jan	1	Mon	18
1079	2023-01-02	18:53:56	1	3	Astoria	78	4.5	Bakery	Scone	Scottish Cream Scone	4.5	1	Jan	1	Mon	18
1080	2023-01-02	18:54:10	2	3	Astoria	23	2.5	Coffee	Drip coffee	Our Old Time Diner Blend Rg	5	1	Jan	1	Mon	18
1081	2023-01-02	18:57:01	1	8	Hell's Kitchen	51	3	Tea	Brewed Black tea	Earl Grey Lg	3	1	Jan	1	Mon	18
1082	2023-01-02	19:00:58	1	3	Astoria	22	2	Coffee	Drip coffee	Our Old Time Diner Blend Sm	2	1	Jan	1	Mon	19
1083	2023-01-02	19:01:16	1	3	Astoria	48	2.5	Tea	Brewed Black tea	English Breakfast Rg	2.5	1	Jan	1	Mon	19
1084	2023-01-02	19:01:39	2	3	Astoria	59	4.5	Drinking Chocolate	Hot chocolate	Dark chocolate Lg	9	1	Jan	1	Mon	19
1085	2023-01-02	19:12:27	1	3	Astoria	40	3.75	Coffee	Barista Espresso	Cappuccino	3.75	1	Jan	1	Mon	19
1086	2023-01-02	19:14:55	2	8	Hell's Kitchen	39	4.25	Coffee	Barista Espresso	Latte Rg	8.5	1	Jan	1	Mon	19
1087	2023-01-02	19:14:55	1	8	Hell's Kitchen	70	3.25	Bakery	Scone	Cranberry Scone	3.25	1	Jan	1	Mon	19
1088	2023-01-02	19:16:12	2	3	Astoria	50	2.5	Tea	Brewed Black tea	Earl Grey Rg	5	1	Jan	1	Mon	19
1089	2023-01-02	19:16:12	1	3	Astoria	71	3.75	Bakery	Pastry	Chocolate Croissant	3.75	1	Jan	1	Mon	19
1090	2023-01-02	19:18:07	1	8	Hell's Kitchen	57	3.1	Tea	Brewed Chai tea	Spicy Eye Opener Chai Lg	3.1	1	Jan	1	Mon	19
1091	2023-01-02	19:19:55	2	8	Hell's Kitchen	37	3	Coffee	Barista Espresso	Espresso shot	6	1	Jan	1	Mon	19
1092	2023-01-02	19:22:54	1	3	Astoria	24	3	Coffee	Drip coffee	Our Old Time Diner Blend Lg	3	1	Jan	1	Mon	19
1093	2023-01-02	19:25:06	2	3	Astoria	22	2	Coffee	Drip coffee	Our Old Time Diner Blend Sm	4	1	Jan	1	Mon	19
1094	2023-01-02	19:25:06	1	3	Astoria	72	3.25	Bakery	Scone	Ginger Scone	3.25	1	Jan	1	Mon	19
1095	2023-01-02	19:26:53	2	8	Hell's Kitchen	23	2.5	Coffee	Drip coffee	Our Old Time Diner Blend Rg	5	1	Jan	1	Mon	19
1096	2023-01-02	19:27:07	1	8	Hell's Kitchen	22	2	Coffee	Drip coffee	Our Old Time Diner Blend Sm	2	1	Jan	1	Mon	19
1097	2023-01-02	19:27:07	1	8	Hell's Kitchen	69	3.25	Bakery	Biscotti	Hazelnut Biscotti	3.25	1	Jan	1	Mon	19
1098	2023-01-02	19:28:16	2	3	Astoria	25	2.2	Coffee	Organic brewed coffee	Brazilian Sm	4.4	1	Jan	1	Mon	19
1099	2023-01-02	19:29:54	1	8	Hell's Kitchen	34	2.45	Coffee	Premium brewed coffee	Jamaican Coffee River Sm	2.45	1	Jan	1	Mon	19
1100	2023-01-02	19:35:14	1	8	Hell's Kitchen	40	3.75	Coffee	Barista Espresso	Cappuccino	3.75	1	Jan	1	Mon	19
1101	2023-01-02	19:35:31	2	8	Hell's Kitchen	49	3	Tea	Brewed Black tea	English Breakfast Lg	6	1	Jan	1	Mon	19
1102	2023-01-02	19:42:15	2	8	Hell's Kitchen	41	4.25	Coffee	Barista Espresso	Cappuccino Lg	8.5	1	Jan	1	Mon	19
1103	2023-01-02	19:45:11	2	3	Astoria	49	3	Tea	Brewed Black tea	English Breakfast Lg	6	1	Jan	1	Mon	19
1104	2023-01-02	19:46:07	2	8	Hell's Kitchen	57	3.1	Tea	Brewed Chai tea	Spicy Eye Opener Chai Lg	6.2	1	Jan	1	Mon	19
1105	2023-01-02	19:46:07	1	8	Hell's Kitchen	74	3.5	Bakery	Biscotti	Ginger Biscotti	3.5	1	Jan	1	Mon	19
1106	2023-01-02	19:46:38	2	3	Astoria	33	3.5	Coffee	Gourmet brewed coffee	Ethiopia Lg	7	1	Jan	1	Mon	19
1107	2023-01-02	19:48:49	2	8	Hell's Kitchen	28	2	Coffee	Gourmet brewed coffee	Columbian Medium Roast Sm	4	1	Jan	1	Mon	19
1108	2023-01-02	19:48:49	1	8	Hell's Kitchen	75	3.5	Bakery	Pastry	Croissant	3.5	1	Jan	1	Mon	19
1109	2023-01-02	19:53:02	1	3	Astoria	22	2	Coffee	Drip coffee	Our Old Time Diner Blend Sm	2	1	Jan	1	Mon	19
1110	2023-01-02	19:53:02	1	3	Astoria	74	3.5	Bakery	Biscotti	Ginger Biscotti	3.5	1	Jan	1	Mon	19
1111	2023-01-02	19:53:55	2	3	Astoria	43	3	Tea	Brewed herbal tea	Lemon Grass Lg	6	1	Jan	1	Mon	19
1112	2023-01-02	19:57:01	2	8	Hell's Kitchen	56	2.55	Tea	Brewed Chai tea	Spicy Eye Opener Chai Rg	5.1	1	Jan	1	Mon	19
1113	2023-01-02	19:57:23	1	3	Astoria	52	2.5	Tea	Brewed Chai tea	Traditional Blend Chai Rg	2.5	1	Jan	1	Mon	19
1114	2023-01-02	19:57:23	1	3	Astoria	72	3.25	Bakery	Scone	Ginger Scone	3.25	1	Jan	1	Mon	19
1115	2023-01-02	19:58:10	2	8	Hell's Kitchen	26	3	Coffee	Organic brewed coffee	Brazilian Rg	6	1	Jan	1	Mon	19
1116	2023-01-02	19:58:35	1	3	Astoria	37	3	Coffee	Barista Espresso	Espresso shot	3	1	Jan	1	Mon	19
1117	2023-01-03	07:04:46	2	5	Lower Manhattan	43	3	Tea	Brewed herbal tea	Lemon Grass Lg	6	1	Jan	2	Tue	7
1118	2023-01-03	07:04:46	1	5	Lower Manhattan	78	4.5	Bakery	Scone	Scottish Cream Scone	4.5	1	Jan	2	Tue	7
1119	2023-01-03	07:06:53	2	5	Lower Manhattan	29	2.5	Coffee	Gourmet brewed coffee	Columbian Medium Roast Rg	5	1	Jan	2	Tue	7
1120	2023-01-03	07:16:26	2	5	Lower Manhattan	59	4.5	Drinking Chocolate	Hot chocolate	Dark chocolate Lg	9	1	Jan	2	Tue	7
1121	2023-01-03	07:16:26	1	5	Lower Manhattan	73	3.75	Bakery	Pastry	Almond Croissant	3.75	1	Jan	2	Tue	7
1122	2023-01-03	07:17:23	1	5	Lower Manhattan	45	3	Tea	Brewed herbal tea	Peppermint Lg	3	1	Jan	2	Tue	7
1123	2023-01-03	07:37:05	2	5	Lower Manhattan	56	2.55	Tea	Brewed Chai tea	Spicy Eye Opener Chai Rg	5.1	1	Jan	2	Tue	7
1124	2023-01-03	08:06:33	1	8	Hell's Kitchen	41	4.25	Coffee	Barista Espresso	Cappuccino Lg	4.25	1	Jan	2	Tue	8
1125	2023-01-03	08:09:50	2	5	Lower Manhattan	60	3.75	Drinking Chocolate	Hot chocolate	Sustainably Grown Organic Rg	7.5	1	Jan	2	Tue	8
1126	2023-01-03	08:13:04	1	8	Hell's Kitchen	44	2.5	Tea	Brewed herbal tea	Peppermint Rg	2.5	1	Jan	2	Tue	8
1127	2023-01-03	08:13:05	1	8	Hell's Kitchen	37	3	Coffee	Barista Espresso	Espresso shot	3	1	Jan	2	Tue	8
1128	2023-01-03	08:13:05	1	8	Hell's Kitchen	76	3.5	Bakery	Biscotti	Chocolate Chip Biscotti	3.5	1	Jan	2	Tue	8
1129	2023-01-03	08:15:37	1	8	Hell's Kitchen	41	4.25	Coffee	Barista Espresso	Cappuccino Lg	4.25	1	Jan	2	Tue	8
1130	2023-01-03	08:18:30	2	8	Hell's Kitchen	45	3	Tea	Brewed herbal tea	Peppermint Lg	6	1	Jan	2	Tue	8
1131	2023-01-03	08:18:53	2	8	Hell's Kitchen	23	2.5	Coffee	Drip coffee	Our Old Time Diner Blend Rg	5	1	Jan	2	Tue	8
1132	2023-01-03	08:18:56	2	8	Hell's Kitchen	29	2.5	Coffee	Gourmet brewed coffee	Columbian Medium Roast Rg	5	1	Jan	2	Tue	8
1133	2023-01-03	08:19:33	2	8	Hell's Kitchen	52	2.5	Tea	Brewed Chai tea	Traditional Blend Chai Rg	5	1	Jan	2	Tue	8
1134	2023-01-03	08:19:47	1	5	Lower Manhattan	51	3	Tea	Brewed Black tea	Earl Grey Lg	3	1	Jan	2	Tue	8
1135	2023-01-03	08:20:55	1	5	Lower Manhattan	32	3	Coffee	Gourmet brewed coffee	Ethiopia Rg	3	1	Jan	2	Tue	8
1136	2023-01-03	08:22:14	1	5	Lower Manhattan	27	3.5	Coffee	Organic brewed coffee	Brazilian Lg	3.5	1	Jan	2	Tue	8
1137	2023-01-03	08:23:51	2	8	Hell's Kitchen	48	2.5	Tea	Brewed Black tea	English Breakfast Rg	5	1	Jan	2	Tue	8
1138	2023-01-03	08:28:33	2	5	Lower Manhattan	30	3	Coffee	Gourmet brewed coffee	Columbian Medium Roast Lg	6	1	Jan	2	Tue	8
1139	2023-01-03	08:28:53	2	8	Hell's Kitchen	60	3.75	Drinking Chocolate	Hot chocolate	Sustainably Grown Organic Rg	7.5	1	Jan	2	Tue	8
1140	2023-01-03	08:30:14	2	5	Lower Manhattan	40	3.75	Coffee	Barista Espresso	Cappuccino	7.5	1	Jan	2	Tue	8
1141	2023-01-03	08:31:06	2	8	Hell's Kitchen	22	2	Coffee	Drip coffee	Our Old Time Diner Blend Sm	4	1	Jan	2	Tue	8
1142	2023-01-03	08:31:07	1	5	Lower Manhattan	41	4.25	Coffee	Barista Espresso	Cappuccino Lg	4.25	1	Jan	2	Tue	8
1143	2023-01-03	08:31:07	1	5	Lower Manhattan	78	4.5	Bakery	Scone	Scottish Cream Scone	4.5	1	Jan	2	Tue	8
1144	2023-01-03	08:32:12	2	8	Hell's Kitchen	59	4.5	Drinking Chocolate	Hot chocolate	Dark chocolate Lg	9	1	Jan	2	Tue	8
1145	2023-01-03	08:32:12	1	8	Hell's Kitchen	78	4.5	Bakery	Scone	Scottish Cream Scone	4.5	1	Jan	2	Tue	8
1146	2023-01-03	08:34:35	1	8	Hell's Kitchen	87	3	Coffee	Barista Espresso	Ouro Brasileiro shot	3	1	Jan	2	Tue	8
1147	2023-01-03	08:37:26	1	8	Hell's Kitchen	60	3.75	Drinking Chocolate	Hot chocolate	Sustainably Grown Organic Rg	3.75	1	Jan	2	Tue	8
1148	2023-01-03	08:37:51	2	5	Lower Manhattan	33	3.5	Coffee	Gourmet brewed coffee	Ethiopia Lg	7	1	Jan	2	Tue	8
1149	2023-01-03	08:40:29	1	8	Hell's Kitchen	56	2.55	Tea	Brewed Chai tea	Spicy Eye Opener Chai Rg	2.55	1	Jan	2	Tue	8
1150	2023-01-03	08:40:29	1	8	Hell's Kitchen	69	3.25	Bakery	Biscotti	Hazelnut Biscotti	3.25	1	Jan	2	Tue	8
1151	2023-01-03	08:40:29	1	8	Hell's Kitchen	35	3.1	Coffee	Premium brewed coffee	Jamaican Coffee River Rg	3.1	1	Jan	2	Tue	8
1152	2023-01-03	08:40:50	1	8	Hell's Kitchen	30	3	Coffee	Gourmet brewed coffee	Columbian Medium Roast Lg	3	1	Jan	2	Tue	8
1153	2023-01-03	08:40:50	1	8	Hell's Kitchen	72	3.25	Bakery	Scone	Ginger Scone	3.25	1	Jan	2	Tue	8
1154	2023-01-03	08:42:28	1	8	Hell's Kitchen	61	4.75	Drinking Chocolate	Hot chocolate	Sustainably Grown Organic Lg	4.75	1	Jan	2	Tue	8
1155	2023-01-03	08:44:23	2	8	Hell's Kitchen	22	2	Coffee	Drip coffee	Our Old Time Diner Blend Sm	4	1	Jan	2	Tue	8
1156	2023-01-03	08:49:32	2	5	Lower Manhattan	61	4.75	Drinking Chocolate	Hot chocolate	Sustainably Grown Organic Lg	9.5	1	Jan	2	Tue	8
1157	2023-01-03	08:49:35	2	5	Lower Manhattan	51	3	Tea	Brewed Black tea	Earl Grey Lg	6	1	Jan	2	Tue	8
1158	2023-01-03	08:49:35	1	5	Lower Manhattan	72	3.25	Bakery	Scone	Ginger Scone	3.25	1	Jan	2	Tue	8
1159	2023-01-03	08:50:00	1	8	Hell's Kitchen	24	3	Coffee	Drip coffee	Our Old Time Diner Blend Lg	3	1	Jan	2	Tue	8
1160	2023-01-03	08:50:21	2	8	Hell's Kitchen	44	2.5	Tea	Brewed herbal tea	Peppermint Rg	5	1	Jan	2	Tue	8
1161	2023-01-03	08:53:31	2	5	Lower Manhattan	54	2.5	Tea	Brewed Chai tea	Morning Sunrise Chai Rg	5	1	Jan	2	Tue	8
1162	2023-01-03	08:54:44	1	8	Hell's Kitchen	53	3	Tea	Brewed Chai tea	Traditional Blend Chai Lg	3	1	Jan	2	Tue	8
1163	2023-01-03	08:56:41	2	5	Lower Manhattan	59	4.5	Drinking Chocolate	Hot chocolate	Dark chocolate Lg	9	1	Jan	2	Tue	8
1164	2023-01-03	09:03:49	2	5	Lower Manhattan	50	2.5	Tea	Brewed Black tea	Earl Grey Rg	5	1	Jan	2	Tue	9
1165	2023-01-03	09:07:30	2	5	Lower Manhattan	87	3	Coffee	Barista Espresso	Ouro Brasileiro shot	6	1	Jan	2	Tue	9
1166	2023-01-03	09:07:30	1	5	Lower Manhattan	70	3.25	Bakery	Scone	Cranberry Scone	3.25	1	Jan	2	Tue	9
1167	2023-01-03	09:07:36	1	8	Hell's Kitchen	52	2.5	Tea	Brewed Chai tea	Traditional Blend Chai Rg	2.5	1	Jan	2	Tue	9
1168	2023-01-03	09:07:36	1	8	Hell's Kitchen	73	3.75	Bakery	Pastry	Almond Croissant	3.75	1	Jan	2	Tue	9
1169	2023-01-03	09:09:30	2	8	Hell's Kitchen	26	3	Coffee	Organic brewed coffee	Brazilian Rg	6	1	Jan	2	Tue	9
1170	2023-01-03	09:09:39	1	5	Lower Manhattan	37	3	Coffee	Barista Espresso	Espresso shot	3	1	Jan	2	Tue	9
1171	2023-01-03	09:15:44	1	5	Lower Manhattan	45	3	Tea	Brewed herbal tea	Peppermint Lg	3	1	Jan	2	Tue	9
1172	2023-01-03	09:18:30	1	8	Hell's Kitchen	22	2	Coffee	Drip coffee	Our Old Time Diner Blend Sm	2	1	Jan	2	Tue	9
1173	2023-01-03	09:18:59	2	5	Lower Manhattan	22	2	Coffee	Drip coffee	Our Old Time Diner Blend Sm	4	1	Jan	2	Tue	9
1174	2023-01-03	09:19:21	1	8	Hell's Kitchen	45	3	Tea	Brewed herbal tea	Peppermint Lg	3	1	Jan	2	Tue	9
1175	2023-01-03	09:23:33	1	5	Lower Manhattan	25	2.2	Coffee	Organic brewed coffee	Brazilian Sm	2.2	1	Jan	2	Tue	9
1176	2023-01-03	09:24:46	1	5	Lower Manhattan	54	2.5	Tea	Brewed Chai tea	Morning Sunrise Chai Rg	2.5	1	Jan	2	Tue	9
1177	2023-01-03	09:27:13	2	8	Hell's Kitchen	50	2.5	Tea	Brewed Black tea	Earl Grey Rg	5	1	Jan	2	Tue	9
1178	2023-01-03	09:30:08	1	5	Lower Manhattan	29	2.5	Coffee	Gourmet brewed coffee	Columbian Medium Roast Rg	2.5	1	Jan	2	Tue	9
1179	2023-01-03	09:33:20	1	8	Hell's Kitchen	42	2.5	Tea	Brewed herbal tea	Lemon Grass Rg	2.5	1	Jan	2	Tue	9
1180	2023-01-03	09:43:23	1	5	Lower Manhattan	45	3	Tea	Brewed herbal tea	Peppermint Lg	3	1	Jan	2	Tue	9
1181	2023-01-03	09:44:41	1	8	Hell's Kitchen	55	4	Tea	Brewed Chai tea	Morning Sunrise Chai Lg	4	1	Jan	2	Tue	9
1182	2023-01-03	09:44:59	1	8	Hell's Kitchen	54	2.5	Tea	Brewed Chai tea	Morning Sunrise Chai Rg	2.5	1	Jan	2	Tue	9
1183	2023-01-03	09:45:43	2	5	Lower Manhattan	50	2.5	Tea	Brewed Black tea	Earl Grey Rg	5	1	Jan	2	Tue	9
1184	2023-01-03	09:49:52	2	5	Lower Manhattan	59	4.5	Drinking Chocolate	Hot chocolate	Dark chocolate Lg	9	1	Jan	2	Tue	9
1185	2023-01-03	09:50:02	2	5	Lower Manhattan	43	3	Tea	Brewed herbal tea	Lemon Grass Lg	6	1	Jan	2	Tue	9
1186	2023-01-03	09:50:30	2	8	Hell's Kitchen	50	2.5	Tea	Brewed Black tea	Earl Grey Rg	5	1	Jan	2	Tue	9
1187	2023-01-03	09:50:48	2	8	Hell's Kitchen	55	4	Tea	Brewed Chai tea	Morning Sunrise Chai Lg	8	1	Jan	2	Tue	9
1188	2023-01-03	09:52:19	2	8	Hell's Kitchen	51	3	Tea	Brewed Black tea	Earl Grey Lg	6	1	Jan	2	Tue	9
1189	2023-01-03	09:53:13	2	8	Hell's Kitchen	37	3	Coffee	Barista Espresso	Espresso shot	6	1	Jan	2	Tue	9
1190	2023-01-03	09:56:34	2	5	Lower Manhattan	49	3	Tea	Brewed Black tea	English Breakfast Lg	6	1	Jan	2	Tue	9
1191	2023-01-03	10:00:05	1	8	Hell's Kitchen	40	3.75	Coffee	Barista Espresso	Cappuccino	3.75	1	Jan	2	Tue	10
1192	2023-01-03	10:01:51	1	5	Lower Manhattan	87	3	Coffee	Barista Espresso	Ouro Brasileiro shot	3	1	Jan	2	Tue	10
1193	2023-01-03	10:11:25	1	8	Hell's Kitchen	33	3.5	Coffee	Gourmet brewed coffee	Ethiopia Lg	3.5	1	Jan	2	Tue	10
1194	2023-01-03	10:12:21	1	5	Lower Manhattan	40	3.75	Coffee	Barista Espresso	Cappuccino	3.75	1	Jan	2	Tue	10
1195	2023-01-03	10:17:13	1	5	Lower Manhattan	37	3	Coffee	Barista Espresso	Espresso shot	3	1	Jan	2	Tue	10
1196	2023-01-03	10:19:53	1	5	Lower Manhattan	34	2.45	Coffee	Premium brewed coffee	Jamaican Coffee River Sm	2.45	1	Jan	2	Tue	10
1197	2023-01-03	10:20:42	1	5	Lower Manhattan	38	3.75	Coffee	Barista Espresso	Latte	3.75	1	Jan	2	Tue	10
1198	2023-01-03	10:22:26	2	5	Lower Manhattan	49	3	Tea	Brewed Black tea	English Breakfast Lg	6	1	Jan	2	Tue	10
1199	2023-01-03	10:25:55	2	5	Lower Manhattan	26	3	Coffee	Organic brewed coffee	Brazilian Rg	6	1	Jan	2	Tue	10
1200	2023-01-03	10:26:39	1	8	Hell's Kitchen	55	4	Tea	Brewed Chai tea	Morning Sunrise Chai Lg	4	1	Jan	2	Tue	10
1201	2023-01-03	10:28:45	1	8	Hell's Kitchen	56	2.55	Tea	Brewed Chai tea	Spicy Eye Opener Chai Rg	2.55	1	Jan	2	Tue	10
1202	2023-01-03	10:30:42	2	5	Lower Manhattan	50	2.5	Tea	Brewed Black tea	Earl Grey Rg	5	1	Jan	2	Tue	10
1203	2023-01-03	10:33:49	1	5	Lower Manhattan	29	2.5	Coffee	Gourmet brewed coffee	Columbian Medium Roast Rg	2.5	1	Jan	2	Tue	10
1204	2023-01-03	10:40:11	2	5	Lower Manhattan	36	3.75	Coffee	Premium brewed coffee	Jamaican Coffee River Lg	7.5	1	Jan	2	Tue	10
1205	2023-01-03	10:41:29	1	5	Lower Manhattan	33	3.5	Coffee	Gourmet brewed coffee	Ethiopia Lg	3.5	1	Jan	2	Tue	10
1206	2023-01-03	10:41:29	1	5	Lower Manhattan	72	3.25	Bakery	Scone	Ginger Scone	3.25	1	Jan	2	Tue	10
1207	2023-01-03	10:43:23	1	5	Lower Manhattan	47	3	Tea	Brewed Green tea	Serenity Green Tea Lg	3	1	Jan	2	Tue	10
1208	2023-01-03	10:47:34	2	8	Hell's Kitchen	46	2.5	Tea	Brewed Green tea	Serenity Green Tea Rg	5	1	Jan	2	Tue	10
1209	2023-01-03	10:49:47	1	8	Hell's Kitchen	37	3	Coffee	Barista Espresso	Espresso shot	3	1	Jan	2	Tue	10
1210	2023-01-03	10:52:38	1	8	Hell's Kitchen	25	2.2	Coffee	Organic brewed coffee	Brazilian Sm	2.2	1	Jan	2	Tue	10
1211	2023-01-03	10:54:16	2	5	Lower Manhattan	39	4.25	Coffee	Barista Espresso	Latte Rg	8.5	1	Jan	2	Tue	10
1212	2023-01-03	10:54:52	2	5	Lower Manhattan	29	2.5	Coffee	Gourmet brewed coffee	Columbian Medium Roast Rg	5	1	Jan	2	Tue	10
1213	2023-01-03	10:56:53	2	5	Lower Manhattan	43	3	Tea	Brewed herbal tea	Lemon Grass Lg	6	1	Jan	2	Tue	10
1214	2023-01-03	10:56:53	1	5	Lower Manhattan	73	3.75	Bakery	Pastry	Almond Croissant	3.75	1	Jan	2	Tue	10
1215	2023-01-03	10:58:20	1	8	Hell's Kitchen	45	3	Tea	Brewed herbal tea	Peppermint Lg	3	1	Jan	2	Tue	10
1216	2023-01-03	10:59:41	2	8	Hell's Kitchen	32	3	Coffee	Gourmet brewed coffee	Ethiopia Rg	6	1	Jan	2	Tue	10
1217	2023-01-03	11:02:48	1	5	Lower Manhattan	54	2.5	Tea	Brewed Chai tea	Morning Sunrise Chai Rg	2.5	1	Jan	2	Tue	11
1218	2023-01-03	11:05:55	2	3	Astoria	28	2	Coffee	Gourmet brewed coffee	Columbian Medium Roast Sm	4	1	Jan	2	Tue	11
1219	2023-01-03	11:06:30	2	3	Astoria	28	2	Coffee	Gourmet brewed coffee	Columbian Medium Roast Sm	4	1	Jan	2	Tue	11
1220	2023-01-03	11:08:16	2	3	Astoria	36	3.75	Coffee	Premium brewed coffee	Jamaican Coffee River Lg	7.5	1	Jan	2	Tue	11
1221	2023-01-03	11:08:51	2	8	Hell's Kitchen	30	3	Coffee	Gourmet brewed coffee	Columbian Medium Roast Lg	6	1	Jan	2	Tue	11
1222	2023-01-03	11:10:02	2	3	Astoria	24	3	Coffee	Drip coffee	Our Old Time Diner Blend Lg	6	1	Jan	2	Tue	11
1223	2023-01-03	11:11:10	2	5	Lower Manhattan	26	3	Coffee	Organic brewed coffee	Brazilian Rg	6	1	Jan	2	Tue	11
1224	2023-01-03	11:11:22	1	5	Lower Manhattan	52	2.5	Tea	Brewed Chai tea	Traditional Blend Chai Rg	2.5	1	Jan	2	Tue	11
1225	2023-01-03	11:16:22	2	3	Astoria	24	3	Coffee	Drip coffee	Our Old Time Diner Blend Lg	6	1	Jan	2	Tue	11
1226	2023-01-03	11:16:40	2	3	Astoria	26	3	Coffee	Organic brewed coffee	Brazilian Rg	6	1	Jan	2	Tue	11
1227	2023-01-03	11:17:01	2	8	Hell's Kitchen	38	3.75	Coffee	Barista Espresso	Latte	7.5	1	Jan	2	Tue	11
1228	2023-01-03	11:18:12	2	3	Astoria	27	3.5	Coffee	Organic brewed coffee	Brazilian Lg	7	1	Jan	2	Tue	11
1229	2023-01-03	11:20:10	2	8	Hell's Kitchen	49	3	Tea	Brewed Black tea	English Breakfast Lg	6	1	Jan	2	Tue	11
1230	2023-01-03	11:21:22	1	8	Hell's Kitchen	42	2.5	Tea	Brewed herbal tea	Lemon Grass Rg	2.5	1	Jan	2	Tue	11
1231	2023-01-03	11:23:05	2	5	Lower Manhattan	26	3	Coffee	Organic brewed coffee	Brazilian Rg	6	1	Jan	2	Tue	11
1232	2023-01-03	11:23:05	1	5	Lower Manhattan	73	3.75	Bakery	Pastry	Almond Croissant	3.75	1	Jan	2	Tue	11
1233	2023-01-03	11:23:56	1	8	Hell's Kitchen	54	2.5	Tea	Brewed Chai tea	Morning Sunrise Chai Rg	2.5	1	Jan	2	Tue	11
1234	2023-01-03	11:23:56	1	8	Hell's Kitchen	72	3.25	Bakery	Scone	Ginger Scone	3.25	1	Jan	2	Tue	11
1235	2023-01-03	11:26:09	2	8	Hell's Kitchen	61	4.75	Drinking Chocolate	Hot chocolate	Sustainably Grown Organic Lg	9.5	1	Jan	2	Tue	11
1236	2023-01-03	11:26:40	2	3	Astoria	60	3.75	Drinking Chocolate	Hot chocolate	Sustainably Grown Organic Rg	7.5	1	Jan	2	Tue	11
1237	2023-01-03	11:26:40	1	3	Astoria	78	4.5	Bakery	Scone	Scottish Cream Scone	4.5	1	Jan	2	Tue	11
1238	2023-01-03	11:26:49	2	3	Astoria	47	3	Tea	Brewed Green tea	Serenity Green Tea Lg	6	1	Jan	2	Tue	11
1239	2023-01-03	11:27:36	1	8	Hell's Kitchen	46	2.5	Tea	Brewed Green tea	Serenity Green Tea Rg	2.5	1	Jan	2	Tue	11
1240	2023-01-03	11:30:16	2	8	Hell's Kitchen	37	3	Coffee	Barista Espresso	Espresso shot	6	1	Jan	2	Tue	11
1241	2023-01-03	11:31:00	2	5	Lower Manhattan	39	4.25	Coffee	Barista Espresso	Latte Rg	8.5	1	Jan	2	Tue	11
1242	2023-01-03	11:31:00	1	5	Lower Manhattan	70	3.25	Bakery	Scone	Cranberry Scone	3.25	1	Jan	2	Tue	11
1243	2023-01-03	11:31:11	1	8	Hell's Kitchen	50	2.5	Tea	Brewed Black tea	Earl Grey Rg	2.5	1	Jan	2	Tue	11
1244	2023-01-03	11:32:49	1	8	Hell's Kitchen	47	3	Tea	Brewed Green tea	Serenity Green Tea Lg	3	1	Jan	2	Tue	11
1245	2023-01-03	11:33:06	2	5	Lower Manhattan	31	2.2	Coffee	Gourmet brewed coffee	Ethiopia Sm	4.4	1	Jan	2	Tue	11
1246	2023-01-03	11:33:08	1	8	Hell's Kitchen	24	3	Coffee	Drip coffee	Our Old Time Diner Blend Lg	3	1	Jan	2	Tue	11
1247	2023-01-03	11:33:44	2	5	Lower Manhattan	26	3	Coffee	Organic brewed coffee	Brazilian Rg	6	1	Jan	2	Tue	11
1248	2023-01-03	11:33:44	1	5	Lower Manhattan	75	3.5	Bakery	Pastry	Croissant	3.5	1	Jan	2	Tue	11
1249	2023-01-03	11:36:44	1	3	Astoria	41	4.25	Coffee	Barista Espresso	Cappuccino Lg	4.25	1	Jan	2	Tue	11
1250	2023-01-03	11:36:49	2	8	Hell's Kitchen	33	3.5	Coffee	Gourmet brewed coffee	Ethiopia Lg	7	1	Jan	2	Tue	11
1251	2023-01-03	11:37:40	2	3	Astoria	46	2.5	Tea	Brewed Green tea	Serenity Green Tea Rg	5	1	Jan	2	Tue	11
1252	2023-01-03	11:37:50	2	3	Astoria	32	3	Coffee	Gourmet brewed coffee	Ethiopia Rg	6	1	Jan	2	Tue	11
1253	2023-01-03	11:37:55	1	3	Astoria	32	3	Coffee	Gourmet brewed coffee	Ethiopia Rg	3	1	Jan	2	Tue	11
1254	2023-01-03	11:40:15	2	3	Astoria	30	3	Coffee	Gourmet brewed coffee	Columbian Medium Roast Lg	6	1	Jan	2	Tue	11
1255	2023-01-03	11:40:31	1	8	Hell's Kitchen	43	3	Tea	Brewed herbal tea	Lemon Grass Lg	3	1	Jan	2	Tue	11
1256	2023-01-03	11:42:01	2	5	Lower Manhattan	28	2	Coffee	Gourmet brewed coffee	Columbian Medium Roast Sm	4	1	Jan	2	Tue	11
1257	2023-01-03	11:42:48	2	3	Astoria	40	3.75	Coffee	Barista Espresso	Cappuccino	7.5	1	Jan	2	Tue	11
1258	2023-01-03	11:42:48	1	3	Astoria	77	3	Bakery	Scone	Oatmeal Scone	3	1	Jan	2	Tue	11
1259	2023-01-03	11:42:51	1	5	Lower Manhattan	50	2.5	Tea	Brewed Black tea	Earl Grey Rg	2.5	1	Jan	2	Tue	11
1260	2023-01-03	11:43:18	2	5	Lower Manhattan	22	2	Coffee	Drip coffee	Our Old Time Diner Blend Sm	4	1	Jan	2	Tue	11
1261	2023-01-03	11:46:27	1	8	Hell's Kitchen	35	3.1	Coffee	Premium brewed coffee	Jamaican Coffee River Rg	3.1	1	Jan	2	Tue	11
1262	2023-01-03	11:46:27	1	8	Hell's Kitchen	69	3.25	Bakery	Biscotti	Hazelnut Biscotti	3.25	1	Jan	2	Tue	11
1263	2023-01-03	11:46:29	2	3	Astoria	35	3.1	Coffee	Premium brewed coffee	Jamaican Coffee River Rg	6.2	1	Jan	2	Tue	11
1264	2023-01-03	11:46:29	1	3	Astoria	77	3	Bakery	Scone	Oatmeal Scone	3	1	Jan	2	Tue	11
1265	2023-01-03	11:47:50	1	5	Lower Manhattan	48	2.5	Tea	Brewed Black tea	English Breakfast Rg	2.5	1	Jan	2	Tue	11
1266	2023-01-03	11:50:55	1	8	Hell's Kitchen	29	2.5	Coffee	Gourmet brewed coffee	Columbian Medium Roast Rg	2.5	1	Jan	2	Tue	11
1267	2023-01-03	11:51:18	1	8	Hell's Kitchen	43	3	Tea	Brewed herbal tea	Lemon Grass Lg	3	1	Jan	2	Tue	11
1268	2023-01-03	11:52:48	1	8	Hell's Kitchen	59	4.5	Drinking Chocolate	Hot chocolate	Dark chocolate Lg	4.5	1	Jan	2	Tue	11
1269	2023-01-03	11:56:15	1	5	Lower Manhattan	35	3.1	Coffee	Premium brewed coffee	Jamaican Coffee River Rg	3.1	1	Jan	2	Tue	11
1270	2023-01-03	11:56:15	1	5	Lower Manhattan	71	3.75	Bakery	Pastry	Chocolate Croissant	3.75	1	Jan	2	Tue	11
1271	2023-01-03	11:57:06	1	3	Astoria	24	3	Coffee	Drip coffee	Our Old Time Diner Blend Lg	3	1	Jan	2	Tue	11
1272	2023-01-03	11:57:55	1	5	Lower Manhattan	33	3.5	Coffee	Gourmet brewed coffee	Ethiopia Lg	3.5	1	Jan	2	Tue	11
1273	2023-01-03	11:58:06	1	5	Lower Manhattan	36	3.75	Coffee	Premium brewed coffee	Jamaican Coffee River Lg	3.75	1	Jan	2	Tue	11
1274	2023-01-03	11:58:07	2	8	Hell's Kitchen	37	3	Coffee	Barista Espresso	Espresso shot	6	1	Jan	2	Tue	11
1275	2023-01-03	11:59:06	1	3	Astoria	39	4.25	Coffee	Barista Espresso	Latte Rg	4.25	1	Jan	2	Tue	11
1276	2023-01-03	11:59:16	2	5	Lower Manhattan	50	2.5	Tea	Brewed Black tea	Earl Grey Rg	5	1	Jan	2	Tue	11
1277	2023-01-03	11:59:49	2	5	Lower Manhattan	37	3	Coffee	Barista Espresso	Espresso shot	6	1	Jan	2	Tue	11
1278	2023-01-03	12:00:52	1	3	Astoria	50	2.5	Tea	Brewed Black tea	Earl Grey Rg	2.5	1	Jan	2	Tue	12
1279	2023-01-03	12:04:32	2	5	Lower Manhattan	38	3.75	Coffee	Barista Espresso	Latte	7.5	1	Jan	2	Tue	12
1280	2023-01-03	12:05:39	1	5	Lower Manhattan	25	2.2	Coffee	Organic brewed coffee	Brazilian Sm	2.2	1	Jan	2	Tue	12
1281	2023-01-03	12:06:47	1	8	Hell's Kitchen	38	3.75	Coffee	Barista Espresso	Latte	3.75	1	Jan	2	Tue	12
1282	2023-01-03	12:08:20	2	3	Astoria	55	4	Tea	Brewed Chai tea	Morning Sunrise Chai Lg	8	1	Jan	2	Tue	12
1283	2023-01-03	12:14:46	1	8	Hell's Kitchen	56	2.55	Tea	Brewed Chai tea	Spicy Eye Opener Chai Rg	2.55	1	Jan	2	Tue	12
1284	2023-01-03	12:16:03	2	5	Lower Manhattan	25	2.2	Coffee	Organic brewed coffee	Brazilian Sm	4.4	1	Jan	2	Tue	12
1285	2023-01-03	12:16:30	1	3	Astoria	46	2.5	Tea	Brewed Green tea	Serenity Green Tea Rg	2.5	1	Jan	2	Tue	12
1286	2023-01-03	12:17:20	1	3	Astoria	27	3.5	Coffee	Organic brewed coffee	Brazilian Lg	3.5	1	Jan	2	Tue	12
1287	2023-01-03	12:20:44	2	5	Lower Manhattan	47	3	Tea	Brewed Green tea	Serenity Green Tea Lg	6	1	Jan	2	Tue	12
1288	2023-01-03	12:20:50	2	8	Hell's Kitchen	23	2.5	Coffee	Drip coffee	Our Old Time Diner Blend Rg	5	1	Jan	2	Tue	12
1289	2023-01-03	12:23:36	1	8	Hell's Kitchen	35	3.1	Coffee	Premium brewed coffee	Jamaican Coffee River Rg	3.1	1	Jan	2	Tue	12
1290	2023-01-03	12:26:03	1	3	Astoria	51	3	Tea	Brewed Black tea	Earl Grey Lg	3	1	Jan	2	Tue	12
1291	2023-01-03	12:27:58	2	3	Astoria	59	4.5	Drinking Chocolate	Hot chocolate	Dark chocolate Lg	9	1	Jan	2	Tue	12
1292	2023-01-03	12:30:20	1	5	Lower Manhattan	51	3	Tea	Brewed Black tea	Earl Grey Lg	3	1	Jan	2	Tue	12
1293	2023-01-03	12:31:47	2	3	Astoria	59	4.5	Drinking Chocolate	Hot chocolate	Dark chocolate Lg	9	1	Jan	2	Tue	12
1294	2023-01-03	12:35:27	2	8	Hell's Kitchen	61	4.75	Drinking Chocolate	Hot chocolate	Sustainably Grown Organic Lg	9.5	1	Jan	2	Tue	12
1295	2023-01-03	12:36:05	1	3	Astoria	24	3	Coffee	Drip coffee	Our Old Time Diner Blend Lg	3	1	Jan	2	Tue	12
1296	2023-01-03	12:37:48	1	3	Astoria	24	3	Coffee	Drip coffee	Our Old Time Diner Blend Lg	3	1	Jan	2	Tue	12
1297	2023-01-03	12:38:56	1	8	Hell's Kitchen	60	3.75	Drinking Chocolate	Hot chocolate	Sustainably Grown Organic Rg	3.75	1	Jan	2	Tue	12
1298	2023-01-03	12:40:55	1	8	Hell's Kitchen	45	3	Tea	Brewed herbal tea	Peppermint Lg	3	1	Jan	2	Tue	12
1299	2023-01-03	12:44:41	1	5	Lower Manhattan	46	2.5	Tea	Brewed Green tea	Serenity Green Tea Rg	2.5	1	Jan	2	Tue	12
1300	2023-01-03	12:45:07	1	3	Astoria	51	3	Tea	Brewed Black tea	Earl Grey Lg	3	1	Jan	2	Tue	12
1301	2023-01-03	12:45:07	1	3	Astoria	72	3.25	Bakery	Scone	Ginger Scone	3.25	1	Jan	2	Tue	12
1302	2023-01-03	12:46:52	2	3	Astoria	27	3.5	Coffee	Organic brewed coffee	Brazilian Lg	7	1	Jan	2	Tue	12
1303	2023-01-03	12:47:41	2	8	Hell's Kitchen	50	2.5	Tea	Brewed Black tea	Earl Grey Rg	5	1	Jan	2	Tue	12
1304	2023-01-03	12:48:20	2	8	Hell's Kitchen	53	3	Tea	Brewed Chai tea	Traditional Blend Chai Lg	6	1	Jan	2	Tue	12
1305	2023-01-03	12:48:38	1	5	Lower Manhattan	33	3.5	Coffee	Gourmet brewed coffee	Ethiopia Lg	3.5	1	Jan	2	Tue	12
1306	2023-01-03	12:48:38	1	5	Lower Manhattan	76	3.5	Bakery	Biscotti	Chocolate Chip Biscotti	3.5	1	Jan	2	Tue	12
1307	2023-01-03	12:50:34	2	3	Astoria	58	3.5	Drinking Chocolate	Hot chocolate	Dark chocolate Rg	7	1	Jan	2	Tue	12
1308	2023-01-03	12:50:49	2	8	Hell's Kitchen	58	3.5	Drinking Chocolate	Hot chocolate	Dark chocolate Rg	7	1	Jan	2	Tue	12
1309	2023-01-03	12:51:17	2	8	Hell's Kitchen	49	3	Tea	Brewed Black tea	English Breakfast Lg	6	1	Jan	2	Tue	12
1310	2023-01-03	12:52:36	2	8	Hell's Kitchen	48	2.5	Tea	Brewed Black tea	English Breakfast Rg	5	1	Jan	2	Tue	12
1311	2023-01-03	12:52:36	1	8	Hell's Kitchen	74	3.5	Bakery	Biscotti	Ginger Biscotti	3.5	1	Jan	2	Tue	12
1312	2023-01-03	12:52:37	2	3	Astoria	39	4.25	Coffee	Barista Espresso	Latte Rg	8.5	1	Jan	2	Tue	12
1313	2023-01-03	12:55:25	2	3	Astoria	30	3	Coffee	Gourmet brewed coffee	Columbian Medium Roast Lg	6	1	Jan	2	Tue	12
1314	2023-01-03	12:55:49	1	5	Lower Manhattan	45	3	Tea	Brewed herbal tea	Peppermint Lg	3	1	Jan	2	Tue	12
1315	2023-01-03	12:56:02	2	8	Hell's Kitchen	50	2.5	Tea	Brewed Black tea	Earl Grey Rg	5	1	Jan	2	Tue	12
1316	2023-01-03	12:57:48	1	3	Astoria	39	4.25	Coffee	Barista Espresso	Latte Rg	4.25	1	Jan	2	Tue	12
1317	2023-01-03	12:58:20	2	5	Lower Manhattan	35	3.1	Coffee	Premium brewed coffee	Jamaican Coffee River Rg	6.2	1	Jan	2	Tue	12
1318	2023-01-03	13:03:37	2	3	Astoria	30	3	Coffee	Gourmet brewed coffee	Columbian Medium Roast Lg	6	1	Jan	2	Tue	13
1319	2023-01-03	13:04:25	1	5	Lower Manhattan	42	2.5	Tea	Brewed herbal tea	Lemon Grass Rg	2.5	1	Jan	2	Tue	13
1320	2023-01-03	13:04:48	2	5	Lower Manhattan	35	3.1	Coffee	Premium brewed coffee	Jamaican Coffee River Rg	6.2	1	Jan	2	Tue	13
1321	2023-01-03	13:04:48	1	5	Lower Manhattan	74	3.5	Bakery	Biscotti	Ginger Biscotti	3.5	1	Jan	2	Tue	13
1322	2023-01-03	13:05:00	1	8	Hell's Kitchen	22	2	Coffee	Drip coffee	Our Old Time Diner Blend Sm	2	1	Jan	2	Tue	13
1323	2023-01-03	13:05:16	1	3	Astoria	59	4.5	Drinking Chocolate	Hot chocolate	Dark chocolate Lg	4.5	1	Jan	2	Tue	13
1324	2023-01-03	13:05:16	1	3	Astoria	76	3.5	Bakery	Biscotti	Chocolate Chip Biscotti	3.5	1	Jan	2	Tue	13
1325	2023-01-03	13:06:00	2	3	Astoria	22	2	Coffee	Drip coffee	Our Old Time Diner Blend Sm	4	1	Jan	2	Tue	13
1326	2023-01-03	13:07:30	1	3	Astoria	54	2.5	Tea	Brewed Chai tea	Morning Sunrise Chai Rg	2.5	1	Jan	2	Tue	13
1327	2023-01-03	13:09:01	2	5	Lower Manhattan	56	2.55	Tea	Brewed Chai tea	Spicy Eye Opener Chai Rg	5.1	1	Jan	2	Tue	13
1328	2023-01-03	13:09:01	1	5	Lower Manhattan	74	3.5	Bakery	Biscotti	Ginger Biscotti	3.5	1	Jan	2	Tue	13
1329	2023-01-03	13:12:16	2	3	Astoria	23	2.5	Coffee	Drip coffee	Our Old Time Diner Blend Rg	5	1	Jan	2	Tue	13
1330	2023-01-03	13:12:49	2	5	Lower Manhattan	42	2.5	Tea	Brewed herbal tea	Lemon Grass Rg	5	1	Jan	2	Tue	13
1331	2023-01-03	13:12:49	1	5	Lower Manhattan	78	4.5	Bakery	Scone	Scottish Cream Scone	4.5	1	Jan	2	Tue	13
1332	2023-01-03	13:13:33	2	3	Astoria	37	3	Coffee	Barista Espresso	Espresso shot	6	1	Jan	2	Tue	13
1333	2023-01-03	13:16:53	2	3	Astoria	49	3	Tea	Brewed Black tea	English Breakfast Lg	6	1	Jan	2	Tue	13
1334	2023-01-03	13:17:20	1	8	Hell's Kitchen	61	4.75	Drinking Chocolate	Hot chocolate	Sustainably Grown Organic Lg	4.75	1	Jan	2	Tue	13
1335	2023-01-03	13:18:51	2	3	Astoria	51	3	Tea	Brewed Black tea	Earl Grey Lg	6	1	Jan	2	Tue	13
1336	2023-01-03	13:18:51	1	3	Astoria	75	3.5	Bakery	Pastry	Croissant	3.5	1	Jan	2	Tue	13
1337	2023-01-03	13:20:01	2	3	Astoria	23	2.5	Coffee	Drip coffee	Our Old Time Diner Blend Rg	5	1	Jan	2	Tue	13
1338	2023-01-03	13:20:13	1	3	Astoria	34	2.45	Coffee	Premium brewed coffee	Jamaican Coffee River Sm	2.45	1	Jan	2	Tue	13
1339	2023-01-03	13:24:10	1	3	Astoria	55	4	Tea	Brewed Chai tea	Morning Sunrise Chai Lg	4	1	Jan	2	Tue	13
1340	2023-01-03	13:26:51	1	8	Hell's Kitchen	44	2.5	Tea	Brewed herbal tea	Peppermint Rg	2.5	1	Jan	2	Tue	13
1341	2023-01-03	13:26:51	1	8	Hell's Kitchen	70	3.25	Bakery	Scone	Cranberry Scone	3.25	1	Jan	2	Tue	13
1342	2023-01-03	13:28:12	1	3	Astoria	38	3.75	Coffee	Barista Espresso	Latte	3.75	1	Jan	2	Tue	13
1343	2023-01-03	13:31:04	1	5	Lower Manhattan	43	3	Tea	Brewed herbal tea	Lemon Grass Lg	3	1	Jan	2	Tue	13
1344	2023-01-03	13:31:04	1	5	Lower Manhattan	74	3.5	Bakery	Biscotti	Ginger Biscotti	3.5	1	Jan	2	Tue	13
1345	2023-01-03	13:34:08	1	8	Hell's Kitchen	37	3	Coffee	Barista Espresso	Espresso shot	3	1	Jan	2	Tue	13
1346	2023-01-03	13:38:29	2	3	Astoria	50	2.5	Tea	Brewed Black tea	Earl Grey Rg	5	1	Jan	2	Tue	13
1347	2023-01-03	13:39:52	1	8	Hell's Kitchen	29	2.5	Coffee	Gourmet brewed coffee	Columbian Medium Roast Rg	2.5	1	Jan	2	Tue	13
1348	2023-01-03	13:41:00	1	3	Astoria	55	4	Tea	Brewed Chai tea	Morning Sunrise Chai Lg	4	1	Jan	2	Tue	13
1349	2023-01-03	13:44:19	1	8	Hell's Kitchen	54	2.5	Tea	Brewed Chai tea	Morning Sunrise Chai Rg	2.5	1	Jan	2	Tue	13
1350	2023-01-03	13:45:54	2	3	Astoria	43	3	Tea	Brewed herbal tea	Lemon Grass Lg	6	1	Jan	2	Tue	13
1351	2023-01-03	13:48:42	2	3	Astoria	26	3	Coffee	Organic brewed coffee	Brazilian Rg	6	1	Jan	2	Tue	13
1352	2023-01-03	13:48:44	2	8	Hell's Kitchen	42	2.5	Tea	Brewed herbal tea	Lemon Grass Rg	5	1	Jan	2	Tue	13
1353	2023-01-03	13:48:44	1	8	Hell's Kitchen	73	3.75	Bakery	Pastry	Almond Croissant	3.75	1	Jan	2	Tue	13
1354	2023-01-03	13:52:13	1	3	Astoria	54	2.5	Tea	Brewed Chai tea	Morning Sunrise Chai Rg	2.5	1	Jan	2	Tue	13
1355	2023-01-03	13:52:13	1	3	Astoria	75	3.5	Bakery	Pastry	Croissant	3.5	1	Jan	2	Tue	13
1356	2023-01-03	13:57:02	2	3	Astoria	27	3.5	Coffee	Organic brewed coffee	Brazilian Lg	7	1	Jan	2	Tue	13
1357	2023-01-03	13:57:16	2	3	Astoria	48	2.5	Tea	Brewed Black tea	English Breakfast Rg	5	1	Jan	2	Tue	13
1358	2023-01-03	13:57:24	2	3	Astoria	57	3.1	Tea	Brewed Chai tea	Spicy Eye Opener Chai Lg	6.2	1	Jan	2	Tue	13
1359	2023-01-03	13:57:28	1	8	Hell's Kitchen	57	3.1	Tea	Brewed Chai tea	Spicy Eye Opener Chai Lg	3.1	1	Jan	2	Tue	13
1360	2023-01-03	13:58:14	1	3	Astoria	45	3	Tea	Brewed herbal tea	Peppermint Lg	3	1	Jan	2	Tue	13
1361	2023-01-03	13:59:44	1	8	Hell's Kitchen	30	3	Coffee	Gourmet brewed coffee	Columbian Medium Roast Lg	3	1	Jan	2	Tue	13
1362	2023-01-03	14:00:27	1	3	Astoria	55	4	Tea	Brewed Chai tea	Morning Sunrise Chai Lg	4	1	Jan	2	Tue	14
1363	2023-01-03	14:03:06	2	3	Astoria	26	3	Coffee	Organic brewed coffee	Brazilian Rg	6	1	Jan	2	Tue	14
1364	2023-01-03	14:03:48	2	3	Astoria	49	3	Tea	Brewed Black tea	English Breakfast Lg	6	1	Jan	2	Tue	14
1365	2023-01-03	14:03:54	1	3	Astoria	56	2.55	Tea	Brewed Chai tea	Spicy Eye Opener Chai Rg	2.55	1	Jan	2	Tue	14
1366	2023-01-03	14:04:38	2	5	Lower Manhattan	38	3.75	Coffee	Barista Espresso	Latte	7.5	1	Jan	2	Tue	14
1367	2023-01-03	14:04:48	2	3	Astoria	59	4.5	Drinking Chocolate	Hot chocolate	Dark chocolate Lg	9	1	Jan	2	Tue	14
1368	2023-01-03	14:06:01	2	3	Astoria	49	3	Tea	Brewed Black tea	English Breakfast Lg	6	1	Jan	2	Tue	14
1369	2023-01-03	14:07:15	1	3	Astoria	37	3	Coffee	Barista Espresso	Espresso shot	3	1	Jan	2	Tue	14
1370	2023-01-03	14:08:26	1	8	Hell's Kitchen	39	4.25	Coffee	Barista Espresso	Latte Rg	4.25	1	Jan	2	Tue	14
1371	2023-01-03	14:09:18	1	8	Hell's Kitchen	42	2.5	Tea	Brewed herbal tea	Lemon Grass Rg	2.5	1	Jan	2	Tue	14
1372	2023-01-03	14:09:52	1	8	Hell's Kitchen	56	2.55	Tea	Brewed Chai tea	Spicy Eye Opener Chai Rg	2.55	1	Jan	2	Tue	14
1373	2023-01-03	14:10:19	1	8	Hell's Kitchen	39	4.25	Coffee	Barista Espresso	Latte Rg	4.25	1	Jan	2	Tue	14
1374	2023-01-03	14:13:15	2	3	Astoria	24	3	Coffee	Drip coffee	Our Old Time Diner Blend Lg	6	1	Jan	2	Tue	14
1375	2023-01-03	14:13:47	2	5	Lower Manhattan	54	2.5	Tea	Brewed Chai tea	Morning Sunrise Chai Rg	5	1	Jan	2	Tue	14
1376	2023-01-03	14:13:47	1	5	Lower Manhattan	72	3.25	Bakery	Scone	Ginger Scone	3.25	1	Jan	2	Tue	14
1377	2023-01-03	14:14:01	2	5	Lower Manhattan	48	2.5	Tea	Brewed Black tea	English Breakfast Rg	5	1	Jan	2	Tue	14
1378	2023-01-03	14:15:05	2	3	Astoria	57	3.1	Tea	Brewed Chai tea	Spicy Eye Opener Chai Lg	6.2	1	Jan	2	Tue	14
1379	2023-01-03	14:15:50	2	8	Hell's Kitchen	54	2.5	Tea	Brewed Chai tea	Morning Sunrise Chai Rg	5	1	Jan	2	Tue	14
1380	2023-01-03	14:17:42	1	5	Lower Manhattan	41	4.25	Coffee	Barista Espresso	Cappuccino Lg	4.25	1	Jan	2	Tue	14
1381	2023-01-03	14:18:47	2	5	Lower Manhattan	35	3.1	Coffee	Premium brewed coffee	Jamaican Coffee River Rg	6.2	1	Jan	2	Tue	14
1382	2023-01-03	14:18:47	1	5	Lower Manhattan	71	3.75	Bakery	Pastry	Chocolate Croissant	3.75	1	Jan	2	Tue	14
1383	2023-01-03	14:18:58	2	3	Astoria	57	3.1	Tea	Brewed Chai tea	Spicy Eye Opener Chai Lg	6.2	1	Jan	2	Tue	14
1384	2023-01-03	14:19:44	2	5	Lower Manhattan	59	4.5	Drinking Chocolate	Hot chocolate	Dark chocolate Lg	9	1	Jan	2	Tue	14
1385	2023-01-03	14:21:57	2	3	Astoria	38	3.75	Coffee	Barista Espresso	Latte	7.5	1	Jan	2	Tue	14
1386	2023-01-03	14:22:00	2	5	Lower Manhattan	36	3.75	Coffee	Premium brewed coffee	Jamaican Coffee River Lg	7.5	1	Jan	2	Tue	14
1387	2023-01-03	14:22:00	1	5	Lower Manhattan	79	3.75	Bakery	Scone	Jumbo Savory Scone	3.75	1	Jan	2	Tue	14
1388	2023-01-03	14:22:48	2	5	Lower Manhattan	26	3	Coffee	Organic brewed coffee	Brazilian Rg	6	1	Jan	2	Tue	14
1389	2023-01-03	14:23:43	2	3	Astoria	32	3	Coffee	Gourmet brewed coffee	Ethiopia Rg	6	1	Jan	2	Tue	14
1390	2023-01-03	14:23:54	2	8	Hell's Kitchen	42	2.5	Tea	Brewed herbal tea	Lemon Grass Rg	5	1	Jan	2	Tue	14
1391	2023-01-03	14:24:01	2	8	Hell's Kitchen	23	2.5	Coffee	Drip coffee	Our Old Time Diner Blend Rg	5	1	Jan	2	Tue	14
1392	2023-01-03	14:24:01	1	8	Hell's Kitchen	74	3.5	Bakery	Biscotti	Ginger Biscotti	3.5	1	Jan	2	Tue	14
1393	2023-01-03	14:24:14	1	8	Hell's Kitchen	35	3.1	Coffee	Premium brewed coffee	Jamaican Coffee River Rg	3.1	1	Jan	2	Tue	14
1394	2023-01-03	14:28:01	2	8	Hell's Kitchen	52	2.5	Tea	Brewed Chai tea	Traditional Blend Chai Rg	5	1	Jan	2	Tue	14
1395	2023-01-03	14:30:24	2	3	Astoria	27	3.5	Coffee	Organic brewed coffee	Brazilian Lg	7	1	Jan	2	Tue	14
1396	2023-01-03	14:30:38	1	8	Hell's Kitchen	37	3	Coffee	Barista Espresso	Espresso shot	3	1	Jan	2	Tue	14
1397	2023-01-03	14:31:14	2	3	Astoria	37	3	Coffee	Barista Espresso	Espresso shot	6	1	Jan	2	Tue	14
1398	2023-01-03	14:33:36	2	8	Hell's Kitchen	45	3	Tea	Brewed herbal tea	Peppermint Lg	6	1	Jan	2	Tue	14
1399	2023-01-03	14:34:28	1	8	Hell's Kitchen	25	2.2	Coffee	Organic brewed coffee	Brazilian Sm	2.2	1	Jan	2	Tue	14
1400	2023-01-03	14:35:13	2	5	Lower Manhattan	31	2.2	Coffee	Gourmet brewed coffee	Ethiopia Sm	4.4	1	Jan	2	Tue	14
1401	2023-01-03	14:37:12	1	3	Astoria	41	4.25	Coffee	Barista Espresso	Cappuccino Lg	4.25	1	Jan	2	Tue	14
1402	2023-01-03	14:38:17	1	3	Astoria	40	3.75	Coffee	Barista Espresso	Cappuccino	3.75	1	Jan	2	Tue	14
1403	2023-01-03	14:38:17	1	3	Astoria	74	3.5	Bakery	Biscotti	Ginger Biscotti	3.5	1	Jan	2	Tue	14
1404	2023-01-03	14:41:47	2	3	Astoria	36	3.75	Coffee	Premium brewed coffee	Jamaican Coffee River Lg	7.5	1	Jan	2	Tue	14
1405	2023-01-03	14:42:59	1	5	Lower Manhattan	51	3	Tea	Brewed Black tea	Earl Grey Lg	3	1	Jan	2	Tue	14
1406	2023-01-03	14:43:48	2	8	Hell's Kitchen	59	4.5	Drinking Chocolate	Hot chocolate	Dark chocolate Lg	9	1	Jan	2	Tue	14
1407	2023-01-03	14:44:43	1	3	Astoria	27	3.5	Coffee	Organic brewed coffee	Brazilian Lg	3.5	1	Jan	2	Tue	14
1408	2023-01-03	14:44:43	1	3	Astoria	70	3.25	Bakery	Scone	Cranberry Scone	3.25	1	Jan	2	Tue	14
1409	2023-01-03	14:45:14	1	3	Astoria	37	3	Coffee	Barista Espresso	Espresso shot	3	1	Jan	2	Tue	14
1410	2023-01-03	14:47:09	2	3	Astoria	26	3	Coffee	Organic brewed coffee	Brazilian Rg	6	1	Jan	2	Tue	14
1411	2023-01-03	14:47:10	1	3	Astoria	55	4	Tea	Brewed Chai tea	Morning Sunrise Chai Lg	4	1	Jan	2	Tue	14
1412	2023-01-03	14:47:10	1	3	Astoria	76	3.5	Bakery	Biscotti	Chocolate Chip Biscotti	3.5	1	Jan	2	Tue	14
1413	2023-01-03	14:47:45	2	8	Hell's Kitchen	24	3	Coffee	Drip coffee	Our Old Time Diner Blend Lg	6	1	Jan	2	Tue	14
1414	2023-01-03	14:47:45	1	8	Hell's Kitchen	78	4.5	Bakery	Scone	Scottish Cream Scone	4.5	1	Jan	2	Tue	14
1415	2023-01-03	14:48:23	2	5	Lower Manhattan	56	2.55	Tea	Brewed Chai tea	Spicy Eye Opener Chai Rg	5.1	1	Jan	2	Tue	14
1416	2023-01-03	14:48:30	1	8	Hell's Kitchen	27	3.5	Coffee	Organic brewed coffee	Brazilian Lg	3.5	1	Jan	2	Tue	14
1417	2023-01-03	14:49:31	1	8	Hell's Kitchen	60	3.75	Drinking Chocolate	Hot chocolate	Sustainably Grown Organic Rg	3.75	1	Jan	2	Tue	14
1418	2023-01-03	14:49:39	2	8	Hell's Kitchen	87	3	Coffee	Barista Espresso	Ouro Brasileiro shot	6	1	Jan	2	Tue	14
1419	2023-01-03	14:51:06	2	5	Lower Manhattan	47	3	Tea	Brewed Green tea	Serenity Green Tea Lg	6	1	Jan	2	Tue	14
1420	2023-01-03	14:53:17	2	8	Hell's Kitchen	35	3.1	Coffee	Premium brewed coffee	Jamaican Coffee River Rg	6.2	1	Jan	2	Tue	14
1421	2023-01-03	14:53:17	1	8	Hell's Kitchen	72	3.25	Bakery	Scone	Ginger Scone	3.25	1	Jan	2	Tue	14
1422	2023-01-03	14:53:51	2	3	Astoria	44	2.5	Tea	Brewed herbal tea	Peppermint Rg	5	1	Jan	2	Tue	14
1423	2023-01-03	14:53:52	1	3	Astoria	42	2.5	Tea	Brewed herbal tea	Lemon Grass Rg	2.5	1	Jan	2	Tue	14
1424	2023-01-03	14:54:41	1	8	Hell's Kitchen	44	2.5	Tea	Brewed herbal tea	Peppermint Rg	2.5	1	Jan	2	Tue	14
1425	2023-01-03	14:54:59	1	3	Astoria	34	2.45	Coffee	Premium brewed coffee	Jamaican Coffee River Sm	2.45	1	Jan	2	Tue	14
1426	2023-01-03	14:55:03	1	5	Lower Manhattan	51	3	Tea	Brewed Black tea	Earl Grey Lg	3	1	Jan	2	Tue	14
1427	2023-01-03	14:56:33	1	3	Astoria	54	2.5	Tea	Brewed Chai tea	Morning Sunrise Chai Rg	2.5	1	Jan	2	Tue	14
1428	2023-01-03	14:57:23	1	8	Hell's Kitchen	52	2.5	Tea	Brewed Chai tea	Traditional Blend Chai Rg	2.5	1	Jan	2	Tue	14
1429	2023-01-03	14:57:49	2	5	Lower Manhattan	57	3.1	Tea	Brewed Chai tea	Spicy Eye Opener Chai Lg	6.2	1	Jan	2	Tue	14
1430	2023-01-03	15:00:04	2	5	Lower Manhattan	36	3.75	Coffee	Premium brewed coffee	Jamaican Coffee River Lg	7.5	1	Jan	2	Tue	15
1431	2023-01-03	15:01:43	1	8	Hell's Kitchen	41	4.25	Coffee	Barista Espresso	Cappuccino Lg	4.25	1	Jan	2	Tue	15
1432	2023-01-03	15:01:43	1	8	Hell's Kitchen	76	3.5	Bakery	Biscotti	Chocolate Chip Biscotti	3.5	1	Jan	2	Tue	15
1433	2023-01-03	15:02:09	1	3	Astoria	48	2.5	Tea	Brewed Black tea	English Breakfast Rg	2.5	1	Jan	2	Tue	15
1434	2023-01-03	15:02:09	1	3	Astoria	70	3.25	Bakery	Scone	Cranberry Scone	3.25	1	Jan	2	Tue	15
1435	2023-01-03	15:02:34	1	3	Astoria	24	3	Coffee	Drip coffee	Our Old Time Diner Blend Lg	3	1	Jan	2	Tue	15
1436	2023-01-03	15:03:23	1	3	Astoria	53	3	Tea	Brewed Chai tea	Traditional Blend Chai Lg	3	1	Jan	2	Tue	15
1437	2023-01-03	15:04:07	2	5	Lower Manhattan	43	3	Tea	Brewed herbal tea	Lemon Grass Lg	6	1	Jan	2	Tue	15
1438	2023-01-03	15:05:33	2	8	Hell's Kitchen	87	3	Coffee	Barista Espresso	Ouro Brasileiro shot	6	1	Jan	2	Tue	15
1439	2023-01-03	15:06:00	1	3	Astoria	25	2.2	Coffee	Organic brewed coffee	Brazilian Sm	2.2	1	Jan	2	Tue	15
1440	2023-01-03	15:06:37	1	5	Lower Manhattan	49	3	Tea	Brewed Black tea	English Breakfast Lg	3	1	Jan	2	Tue	15
1441	2023-01-03	15:06:37	1	5	Lower Manhattan	75	3.5	Bakery	Pastry	Croissant	3.5	1	Jan	2	Tue	15
1442	2023-01-03	15:07:41	1	3	Astoria	47	3	Tea	Brewed Green tea	Serenity Green Tea Lg	3	1	Jan	2	Tue	15
1443	2023-01-03	15:08:18	1	3	Astoria	46	2.5	Tea	Brewed Green tea	Serenity Green Tea Rg	2.5	1	Jan	2	Tue	15
1444	2023-01-03	15:08:18	1	3	Astoria	69	3.25	Bakery	Biscotti	Hazelnut Biscotti	3.25	1	Jan	2	Tue	15
1445	2023-01-03	15:10:02	2	5	Lower Manhattan	32	3	Coffee	Gourmet brewed coffee	Ethiopia Rg	6	1	Jan	2	Tue	15
1446	2023-01-03	15:10:51	2	8	Hell's Kitchen	30	3	Coffee	Gourmet brewed coffee	Columbian Medium Roast Lg	6	1	Jan	2	Tue	15
1447	2023-01-03	15:11:28	2	8	Hell's Kitchen	48	2.5	Tea	Brewed Black tea	English Breakfast Rg	5	1	Jan	2	Tue	15
1448	2023-01-03	15:11:28	1	8	Hell's Kitchen	77	3	Bakery	Scone	Oatmeal Scone	3	1	Jan	2	Tue	15
1449	2023-01-03	15:13:22	2	3	Astoria	48	2.5	Tea	Brewed Black tea	English Breakfast Rg	5	1	Jan	2	Tue	15
1450	2023-01-03	15:13:46	2	5	Lower Manhattan	37	3	Coffee	Barista Espresso	Espresso shot	6	1	Jan	2	Tue	15
1451	2023-01-03	15:15:01	2	8	Hell's Kitchen	45	3	Tea	Brewed herbal tea	Peppermint Lg	6	1	Jan	2	Tue	15
1452	2023-01-03	15:15:39	1	3	Astoria	57	3.1	Tea	Brewed Chai tea	Spicy Eye Opener Chai Lg	3.1	1	Jan	2	Tue	15
1453	2023-01-03	15:15:48	2	5	Lower Manhattan	34	2.45	Coffee	Premium brewed coffee	Jamaican Coffee River Sm	4.9	1	Jan	2	Tue	15
1454	2023-01-03	15:17:03	1	5	Lower Manhattan	58	3.5	Drinking Chocolate	Hot chocolate	Dark chocolate Rg	3.5	1	Jan	2	Tue	15
1455	2023-01-03	15:17:03	1	5	Lower Manhattan	78	4.5	Bakery	Scone	Scottish Cream Scone	4.5	1	Jan	2	Tue	15
1456	2023-01-03	15:18:13	2	8	Hell's Kitchen	32	3	Coffee	Gourmet brewed coffee	Ethiopia Rg	6	1	Jan	2	Tue	15
1457	2023-01-03	15:19:17	1	5	Lower Manhattan	47	3	Tea	Brewed Green tea	Serenity Green Tea Lg	3	1	Jan	2	Tue	15
1458	2023-01-03	15:19:17	1	5	Lower Manhattan	79	3.75	Bakery	Scone	Jumbo Savory Scone	3.75	1	Jan	2	Tue	15
1459	2023-01-03	15:19:59	1	8	Hell's Kitchen	48	2.5	Tea	Brewed Black tea	English Breakfast Rg	2.5	1	Jan	2	Tue	15
1460	2023-01-03	15:23:04	2	3	Astoria	54	2.5	Tea	Brewed Chai tea	Morning Sunrise Chai Rg	5	1	Jan	2	Tue	15
1461	2023-01-03	15:24:23	1	3	Astoria	29	2.5	Coffee	Gourmet brewed coffee	Columbian Medium Roast Rg	2.5	1	Jan	2	Tue	15
1462	2023-01-03	15:24:48	2	3	Astoria	41	4.25	Coffee	Barista Espresso	Cappuccino Lg	8.5	1	Jan	2	Tue	15
1463	2023-01-03	15:26:58	2	3	Astoria	29	2.5	Coffee	Gourmet brewed coffee	Columbian Medium Roast Rg	5	1	Jan	2	Tue	15
1464	2023-01-03	15:27:29	2	8	Hell's Kitchen	38	3.75	Coffee	Barista Espresso	Latte	7.5	1	Jan	2	Tue	15
1465	2023-01-03	15:28:42	2	5	Lower Manhattan	31	2.2	Coffee	Gourmet brewed coffee	Ethiopia Sm	4.4	1	Jan	2	Tue	15
1466	2023-01-03	15:29:25	2	3	Astoria	27	3.5	Coffee	Organic brewed coffee	Brazilian Lg	7	1	Jan	2	Tue	15
1467	2023-01-03	15:30:42	2	5	Lower Manhattan	22	2	Coffee	Drip coffee	Our Old Time Diner Blend Sm	4	1	Jan	2	Tue	15
1468	2023-01-03	15:32:00	2	3	Astoria	25	2.2	Coffee	Organic brewed coffee	Brazilian Sm	4.4	1	Jan	2	Tue	15
1469	2023-01-03	15:32:00	1	3	Astoria	79	3.75	Bakery	Scone	Jumbo Savory Scone	3.75	1	Jan	2	Tue	15
1470	2023-01-03	15:33:20	2	3	Astoria	22	2	Coffee	Drip coffee	Our Old Time Diner Blend Sm	4	1	Jan	2	Tue	15
1471	2023-01-03	15:33:20	1	8	Hell's Kitchen	54	2.5	Tea	Brewed Chai tea	Morning Sunrise Chai Rg	2.5	1	Jan	2	Tue	15
1472	2023-01-03	15:33:20	1	8	Hell's Kitchen	74	3.5	Bakery	Biscotti	Ginger Biscotti	3.5	1	Jan	2	Tue	15
1473	2023-01-03	15:33:40	2	5	Lower Manhattan	38	3.75	Coffee	Barista Espresso	Latte	7.5	1	Jan	2	Tue	15
1474	2023-01-03	15:35:23	1	8	Hell's Kitchen	31	2.2	Coffee	Gourmet brewed coffee	Ethiopia Sm	2.2	1	Jan	2	Tue	15
1475	2023-01-03	15:35:49	2	3	Astoria	43	3	Tea	Brewed herbal tea	Lemon Grass Lg	6	1	Jan	2	Tue	15
1476	2023-01-03	15:36:04	1	3	Astoria	53	3	Tea	Brewed Chai tea	Traditional Blend Chai Lg	3	1	Jan	2	Tue	15
1477	2023-01-03	15:36:32	1	8	Hell's Kitchen	44	2.5	Tea	Brewed herbal tea	Peppermint Rg	2.5	1	Jan	2	Tue	15
1478	2023-01-03	15:37:29	1	3	Astoria	60	3.75	Drinking Chocolate	Hot chocolate	Sustainably Grown Organic Rg	3.75	1	Jan	2	Tue	15
1479	2023-01-03	15:37:29	1	3	Astoria	69	3.25	Bakery	Biscotti	Hazelnut Biscotti	3.25	1	Jan	2	Tue	15
1480	2023-01-03	15:39:00	1	8	Hell's Kitchen	23	2.5	Coffee	Drip coffee	Our Old Time Diner Blend Rg	2.5	1	Jan	2	Tue	15
1481	2023-01-03	15:41:00	2	8	Hell's Kitchen	43	3	Tea	Brewed herbal tea	Lemon Grass Lg	6	1	Jan	2	Tue	15
1482	2023-01-03	15:43:32	1	3	Astoria	55	4	Tea	Brewed Chai tea	Morning Sunrise Chai Lg	4	1	Jan	2	Tue	15
1483	2023-01-03	15:43:40	2	3	Astoria	54	2.5	Tea	Brewed Chai tea	Morning Sunrise Chai Rg	5	1	Jan	2	Tue	15
1484	2023-01-03	15:45:20	1	8	Hell's Kitchen	58	3.5	Drinking Chocolate	Hot chocolate	Dark chocolate Rg	3.5	1	Jan	2	Tue	15
1485	2023-01-03	15:45:57	2	5	Lower Manhattan	29	2.5	Coffee	Gourmet brewed coffee	Columbian Medium Roast Rg	5	1	Jan	2	Tue	15
1486	2023-01-03	15:46:51	1	8	Hell's Kitchen	87	3	Coffee	Barista Espresso	Ouro Brasileiro shot	3	1	Jan	2	Tue	15
1487	2023-01-03	15:46:51	1	8	Hell's Kitchen	77	3	Bakery	Scone	Oatmeal Scone	3	1	Jan	2	Tue	15
1488	2023-01-03	15:47:58	2	8	Hell's Kitchen	61	4.75	Drinking Chocolate	Hot chocolate	Sustainably Grown Organic Lg	9.5	1	Jan	2	Tue	15
1489	2023-01-03	15:47:58	1	8	Hell's Kitchen	76	3.5	Bakery	Biscotti	Chocolate Chip Biscotti	3.5	1	Jan	2	Tue	15
1490	2023-01-03	15:48:24	2	5	Lower Manhattan	54	2.5	Tea	Brewed Chai tea	Morning Sunrise Chai Rg	5	1	Jan	2	Tue	15
1491	2023-01-03	15:48:25	1	8	Hell's Kitchen	59	4.5	Drinking Chocolate	Hot chocolate	Dark chocolate Lg	4.5	1	Jan	2	Tue	15
1492	2023-01-03	15:48:46	2	5	Lower Manhattan	55	4	Tea	Brewed Chai tea	Morning Sunrise Chai Lg	8	1	Jan	2	Tue	15
1493	2023-01-03	15:49:11	1	5	Lower Manhattan	59	4.5	Drinking Chocolate	Hot chocolate	Dark chocolate Lg	4.5	1	Jan	2	Tue	15
1494	2023-01-03	15:51:55	1	8	Hell's Kitchen	27	3.5	Coffee	Organic brewed coffee	Brazilian Lg	3.5	1	Jan	2	Tue	15
1495	2023-01-03	15:52:01	1	3	Astoria	43	3	Tea	Brewed herbal tea	Lemon Grass Lg	3	1	Jan	2	Tue	15
1496	2023-01-03	15:53:19	1	3	Astoria	56	2.55	Tea	Brewed Chai tea	Spicy Eye Opener Chai Rg	2.55	1	Jan	2	Tue	15
1497	2023-01-03	15:55:15	1	8	Hell's Kitchen	34	2.45	Coffee	Premium brewed coffee	Jamaican Coffee River Sm	2.45	1	Jan	2	Tue	15
1498	2023-01-03	15:55:31	1	5	Lower Manhattan	30	3	Coffee	Gourmet brewed coffee	Columbian Medium Roast Lg	3	1	Jan	2	Tue	15
1499	2023-01-03	15:55:36	1	5	Lower Manhattan	58	3.5	Drinking Chocolate	Hot chocolate	Dark chocolate Rg	3.5	1	Jan	2	Tue	15
1500	2023-01-03	15:55:59	2	8	Hell's Kitchen	46	2.5	Tea	Brewed Green tea	Serenity Green Tea Rg	5	1	Jan	2	Tue	15
1501	2023-01-03	15:57:20	2	5	Lower Manhattan	87	3	Coffee	Barista Espresso	Ouro Brasileiro shot	6	1	Jan	2	Tue	15
1502	2023-01-03	15:58:24	2	3	Astoria	59	4.5	Drinking Chocolate	Hot chocolate	Dark chocolate Lg	9	1	Jan	2	Tue	15
1503	2023-01-03	15:58:31	2	3	Astoria	40	3.75	Coffee	Barista Espresso	Cappuccino	7.5	1	Jan	2	Tue	15
1504	2023-01-03	16:00:06	2	8	Hell's Kitchen	24	3	Coffee	Drip coffee	Our Old Time Diner Blend Lg	6	1	Jan	2	Tue	16
1505	2023-01-03	16:00:44	1	5	Lower Manhattan	26	3	Coffee	Organic brewed coffee	Brazilian Rg	3	1	Jan	2	Tue	16
1506	2023-01-03	16:03:08	1	3	Astoria	25	2.2	Coffee	Organic brewed coffee	Brazilian Sm	2.2	1	Jan	2	Tue	16
1507	2023-01-03	16:04:22	2	3	Astoria	27	3.5	Coffee	Organic brewed coffee	Brazilian Lg	7	1	Jan	2	Tue	16
1508	2023-01-03	16:07:48	2	5	Lower Manhattan	38	3.75	Coffee	Barista Espresso	Latte	7.5	1	Jan	2	Tue	16
1509	2023-01-03	16:08:18	1	8	Hell's Kitchen	47	3	Tea	Brewed Green tea	Serenity Green Tea Lg	3	1	Jan	2	Tue	16
1510	2023-01-03	16:13:17	1	3	Astoria	47	3	Tea	Brewed Green tea	Serenity Green Tea Lg	3	1	Jan	2	Tue	16
1511	2023-01-03	16:13:17	1	3	Astoria	76	3.5	Bakery	Biscotti	Chocolate Chip Biscotti	3.5	1	Jan	2	Tue	16
1512	2023-01-03	16:14:44	1	5	Lower Manhattan	45	3	Tea	Brewed herbal tea	Peppermint Lg	3	1	Jan	2	Tue	16
1513	2023-01-03	16:15:10	1	3	Astoria	58	3.5	Drinking Chocolate	Hot chocolate	Dark chocolate Rg	3.5	1	Jan	2	Tue	16
1514	2023-01-03	16:16:00	1	8	Hell's Kitchen	60	3.75	Drinking Chocolate	Hot chocolate	Sustainably Grown Organic Rg	3.75	1	Jan	2	Tue	16
1515	2023-01-03	16:16:00	1	8	Hell's Kitchen	76	3.5	Bakery	Biscotti	Chocolate Chip Biscotti	3.5	1	Jan	2	Tue	16
1516	2023-01-03	16:16:52	1	3	Astoria	43	3	Tea	Brewed herbal tea	Lemon Grass Lg	3	1	Jan	2	Tue	16
1517	2023-01-03	16:21:27	1	8	Hell's Kitchen	46	2.5	Tea	Brewed Green tea	Serenity Green Tea Rg	2.5	1	Jan	2	Tue	16
1518	2023-01-03	16:22:03	1	3	Astoria	37	3	Coffee	Barista Espresso	Espresso shot	3	1	Jan	2	Tue	16
1519	2023-01-03	16:22:58	2	8	Hell's Kitchen	46	2.5	Tea	Brewed Green tea	Serenity Green Tea Rg	5	1	Jan	2	Tue	16
1520	2023-01-03	16:23:10	1	5	Lower Manhattan	39	4.25	Coffee	Barista Espresso	Latte Rg	4.25	1	Jan	2	Tue	16
1521	2023-01-03	16:23:10	1	5	Lower Manhattan	77	3	Bakery	Scone	Oatmeal Scone	3	1	Jan	2	Tue	16
1522	2023-01-03	16:23:27	2	8	Hell's Kitchen	25	2.2	Coffee	Organic brewed coffee	Brazilian Sm	4.4	1	Jan	2	Tue	16
1523	2023-01-03	16:24:45	2	8	Hell's Kitchen	53	3	Tea	Brewed Chai tea	Traditional Blend Chai Lg	6	1	Jan	2	Tue	16
1524	2023-01-03	16:24:45	1	8	Hell's Kitchen	75	3.5	Bakery	Pastry	Croissant	3.5	1	Jan	2	Tue	16
1525	2023-01-03	16:25:31	1	8	Hell's Kitchen	53	3	Tea	Brewed Chai tea	Traditional Blend Chai Lg	3	1	Jan	2	Tue	16
1526	2023-01-03	16:25:47	2	3	Astoria	49	3	Tea	Brewed Black tea	English Breakfast Lg	6	1	Jan	2	Tue	16
1527	2023-01-03	16:29:14	2	8	Hell's Kitchen	46	2.5	Tea	Brewed Green tea	Serenity Green Tea Rg	5	1	Jan	2	Tue	16
1528	2023-01-03	16:29:19	2	5	Lower Manhattan	27	3.5	Coffee	Organic brewed coffee	Brazilian Lg	7	1	Jan	2	Tue	16
1529	2023-01-03	16:29:19	1	5	Lower Manhattan	72	3.25	Bakery	Scone	Ginger Scone	3.25	1	Jan	2	Tue	16
1530	2023-01-03	16:29:24	1	3	Astoria	54	2.5	Tea	Brewed Chai tea	Morning Sunrise Chai Rg	2.5	1	Jan	2	Tue	16
1531	2023-01-03	16:29:35	2	3	Astoria	36	3.75	Coffee	Premium brewed coffee	Jamaican Coffee River Lg	7.5	1	Jan	2	Tue	16
1532	2023-01-03	16:30:03	1	8	Hell's Kitchen	50	2.5	Tea	Brewed Black tea	Earl Grey Rg	2.5	1	Jan	2	Tue	16
1533	2023-01-03	16:31:06	1	8	Hell's Kitchen	32	3	Coffee	Gourmet brewed coffee	Ethiopia Rg	3	1	Jan	2	Tue	16
1534	2023-01-03	16:31:06	1	8	Hell's Kitchen	71	3.75	Bakery	Pastry	Chocolate Croissant	3.75	1	Jan	2	Tue	16
1535	2023-01-03	16:31:41	1	3	Astoria	54	2.5	Tea	Brewed Chai tea	Morning Sunrise Chai Rg	2.5	1	Jan	2	Tue	16
1536	2023-01-03	16:32:29	2	3	Astoria	51	3	Tea	Brewed Black tea	Earl Grey Lg	6	1	Jan	2	Tue	16
1537	2023-01-03	16:33:26	1	5	Lower Manhattan	30	3	Coffee	Gourmet brewed coffee	Columbian Medium Roast Lg	3	1	Jan	2	Tue	16
1538	2023-01-03	16:34:56	1	5	Lower Manhattan	61	4.75	Drinking Chocolate	Hot chocolate	Sustainably Grown Organic Lg	4.75	1	Jan	2	Tue	16
1539	2023-01-03	16:34:56	1	5	Lower Manhattan	75	3.5	Bakery	Pastry	Croissant	3.5	1	Jan	2	Tue	16
1540	2023-01-03	16:35:23	1	8	Hell's Kitchen	32	3	Coffee	Gourmet brewed coffee	Ethiopia Rg	3	1	Jan	2	Tue	16
1541	2023-01-03	16:35:23	1	8	Hell's Kitchen	79	3.75	Bakery	Scone	Jumbo Savory Scone	3.75	1	Jan	2	Tue	16
1542	2023-01-03	16:37:31	2	3	Astoria	36	3.75	Coffee	Premium brewed coffee	Jamaican Coffee River Lg	7.5	1	Jan	2	Tue	16
1543	2023-01-03	16:37:59	2	8	Hell's Kitchen	28	2	Coffee	Gourmet brewed coffee	Columbian Medium Roast Sm	4	1	Jan	2	Tue	16
1544	2023-01-03	16:37:59	1	8	Hell's Kitchen	73	3.75	Bakery	Pastry	Almond Croissant	3.75	1	Jan	2	Tue	16
1545	2023-01-03	16:39:44	1	5	Lower Manhattan	32	3	Coffee	Gourmet brewed coffee	Ethiopia Rg	3	1	Jan	2	Tue	16
1546	2023-01-03	16:40:42	2	8	Hell's Kitchen	26	3	Coffee	Organic brewed coffee	Brazilian Rg	6	1	Jan	2	Tue	16
1547	2023-01-03	16:41:45	1	8	Hell's Kitchen	33	3.5	Coffee	Gourmet brewed coffee	Ethiopia Lg	3.5	1	Jan	2	Tue	16
1548	2023-01-03	16:42:17	2	3	Astoria	25	2.2	Coffee	Organic brewed coffee	Brazilian Sm	4.4	1	Jan	2	Tue	16
1549	2023-01-03	16:43:22	1	5	Lower Manhattan	54	2.5	Tea	Brewed Chai tea	Morning Sunrise Chai Rg	2.5	1	Jan	2	Tue	16
1550	2023-01-03	16:43:36	1	3	Astoria	22	2	Coffee	Drip coffee	Our Old Time Diner Blend Sm	2	1	Jan	2	Tue	16
1551	2023-01-03	16:43:58	1	5	Lower Manhattan	46	2.5	Tea	Brewed Green tea	Serenity Green Tea Rg	2.5	1	Jan	2	Tue	16
1552	2023-01-03	16:43:58	1	5	Lower Manhattan	71	3.75	Bakery	Pastry	Chocolate Croissant	3.75	1	Jan	2	Tue	16
1553	2023-01-03	16:48:31	2	3	Astoria	57	3.1	Tea	Brewed Chai tea	Spicy Eye Opener Chai Lg	6.2	1	Jan	2	Tue	16
1554	2023-01-03	16:49:49	1	5	Lower Manhattan	45	3	Tea	Brewed herbal tea	Peppermint Lg	3	1	Jan	2	Tue	16
1555	2023-01-03	16:50:27	1	8	Hell's Kitchen	61	4.75	Drinking Chocolate	Hot chocolate	Sustainably Grown Organic Lg	4.75	1	Jan	2	Tue	16
1556	2023-01-03	16:50:47	2	5	Lower Manhattan	23	2.5	Coffee	Drip coffee	Our Old Time Diner Blend Rg	5	1	Jan	2	Tue	16
1557	2023-01-03	16:50:47	1	5	Lower Manhattan	77	3	Bakery	Scone	Oatmeal Scone	3	1	Jan	2	Tue	16
1558	2023-01-03	16:51:10	1	3	Astoria	30	3	Coffee	Gourmet brewed coffee	Columbian Medium Roast Lg	3	1	Jan	2	Tue	16
1559	2023-01-03	16:51:51	2	8	Hell's Kitchen	22	2	Coffee	Drip coffee	Our Old Time Diner Blend Sm	4	1	Jan	2	Tue	16
1560	2023-01-03	16:54:02	2	8	Hell's Kitchen	47	3	Tea	Brewed Green tea	Serenity Green Tea Lg	6	1	Jan	2	Tue	16
1561	2023-01-03	16:54:58	2	8	Hell's Kitchen	53	3	Tea	Brewed Chai tea	Traditional Blend Chai Lg	6	1	Jan	2	Tue	16
1562	2023-01-03	16:55:17	1	8	Hell's Kitchen	61	4.75	Drinking Chocolate	Hot chocolate	Sustainably Grown Organic Lg	4.75	1	Jan	2	Tue	16
1563	2023-01-03	16:58:19	1	3	Astoria	34	2.45	Coffee	Premium brewed coffee	Jamaican Coffee River Sm	2.45	1	Jan	2	Tue	16
1564	2023-01-03	16:59:26	2	5	Lower Manhattan	57	3.1	Tea	Brewed Chai tea	Spicy Eye Opener Chai Lg	6.2	1	Jan	2	Tue	16
1565	2023-01-03	17:00:58	1	5	Lower Manhattan	25	2.2	Coffee	Organic brewed coffee	Brazilian Sm	2.2	1	Jan	2	Tue	17
1566	2023-01-03	17:00:58	1	5	Lower Manhattan	79	3.75	Bakery	Scone	Jumbo Savory Scone	3.75	1	Jan	2	Tue	17
1567	2023-01-03	17:03:52	1	3	Astoria	41	4.25	Coffee	Barista Espresso	Cappuccino Lg	4.25	1	Jan	2	Tue	17
1568	2023-01-03	17:04:17	1	3	Astoria	31	2.2	Coffee	Gourmet brewed coffee	Ethiopia Sm	2.2	1	Jan	2	Tue	17
1569	2023-01-03	17:04:37	1	5	Lower Manhattan	58	3.5	Drinking Chocolate	Hot chocolate	Dark chocolate Rg	3.5	1	Jan	2	Tue	17
1570	2023-01-03	17:04:43	2	8	Hell's Kitchen	58	3.5	Drinking Chocolate	Hot chocolate	Dark chocolate Rg	7	1	Jan	2	Tue	17
1571	2023-01-03	17:04:43	1	8	Hell's Kitchen	78	4.5	Bakery	Scone	Scottish Cream Scone	4.5	1	Jan	2	Tue	17
1572	2023-01-03	17:06:06	1	5	Lower Manhattan	56	2.55	Tea	Brewed Chai tea	Spicy Eye Opener Chai Rg	2.55	1	Jan	2	Tue	17
1573	2023-01-03	17:06:38	2	8	Hell's Kitchen	39	4.25	Coffee	Barista Espresso	Latte Rg	8.5	1	Jan	2	Tue	17
1574	2023-01-03	17:06:42	1	8	Hell's Kitchen	57	3.1	Tea	Brewed Chai tea	Spicy Eye Opener Chai Lg	3.1	1	Jan	2	Tue	17
1575	2023-01-03	17:08:41	1	5	Lower Manhattan	25	2.2	Coffee	Organic brewed coffee	Brazilian Sm	2.2	1	Jan	2	Tue	17
1576	2023-01-03	17:09:42	1	8	Hell's Kitchen	52	2.5	Tea	Brewed Chai tea	Traditional Blend Chai Rg	2.5	1	Jan	2	Tue	17
1577	2023-01-03	17:10:42	1	3	Astoria	42	2.5	Tea	Brewed herbal tea	Lemon Grass Rg	2.5	1	Jan	2	Tue	17
1578	2023-01-03	17:13:41	2	5	Lower Manhattan	54	2.5	Tea	Brewed Chai tea	Morning Sunrise Chai Rg	5	1	Jan	2	Tue	17
1579	2023-01-03	17:15:25	1	5	Lower Manhattan	56	2.55	Tea	Brewed Chai tea	Spicy Eye Opener Chai Rg	2.55	1	Jan	2	Tue	17
1580	2023-01-03	17:15:31	2	5	Lower Manhattan	87	3	Coffee	Barista Espresso	Ouro Brasileiro shot	6	1	Jan	2	Tue	17
1581	2023-01-03	17:18:26	1	8	Hell's Kitchen	52	2.5	Tea	Brewed Chai tea	Traditional Blend Chai Rg	2.5	1	Jan	2	Tue	17
1582	2023-01-03	17:18:26	1	8	Hell's Kitchen	75	3.5	Bakery	Pastry	Croissant	3.5	1	Jan	2	Tue	17
1583	2023-01-03	17:19:24	1	3	Astoria	60	3.75	Drinking Chocolate	Hot chocolate	Sustainably Grown Organic Rg	3.75	1	Jan	2	Tue	17
1584	2023-01-03	17:21:34	2	8	Hell's Kitchen	52	2.5	Tea	Brewed Chai tea	Traditional Blend Chai Rg	5	1	Jan	2	Tue	17
1585	2023-01-03	17:22:39	2	3	Astoria	60	3.75	Drinking Chocolate	Hot chocolate	Sustainably Grown Organic Rg	7.5	1	Jan	2	Tue	17
1586	2023-01-03	17:23:03	2	3	Astoria	48	2.5	Tea	Brewed Black tea	English Breakfast Rg	5	1	Jan	2	Tue	17
1587	2023-01-03	17:24:14	2	3	Astoria	28	2	Coffee	Gourmet brewed coffee	Columbian Medium Roast Sm	4	1	Jan	2	Tue	17
1588	2023-01-03	17:25:29	2	8	Hell's Kitchen	25	2.2	Coffee	Organic brewed coffee	Brazilian Sm	4.4	1	Jan	2	Tue	17
1589	2023-01-03	17:25:30	1	5	Lower Manhattan	28	2	Coffee	Gourmet brewed coffee	Columbian Medium Roast Sm	2	1	Jan	2	Tue	17
1590	2023-01-03	17:26:45	2	5	Lower Manhattan	27	3.5	Coffee	Organic brewed coffee	Brazilian Lg	7	1	Jan	2	Tue	17
1591	2023-01-03	17:26:45	1	5	Lower Manhattan	77	3	Bakery	Scone	Oatmeal Scone	3	1	Jan	2	Tue	17
1592	2023-01-03	17:27:11	1	8	Hell's Kitchen	56	2.55	Tea	Brewed Chai tea	Spicy Eye Opener Chai Rg	2.55	1	Jan	2	Tue	17
1593	2023-01-03	17:27:22	1	5	Lower Manhattan	61	4.75	Drinking Chocolate	Hot chocolate	Sustainably Grown Organic Lg	4.75	1	Jan	2	Tue	17
1594	2023-01-03	17:27:24	2	8	Hell's Kitchen	50	2.5	Tea	Brewed Black tea	Earl Grey Rg	5	1	Jan	2	Tue	17
1595	2023-01-03	17:27:24	1	8	Hell's Kitchen	69	3.25	Bakery	Biscotti	Hazelnut Biscotti	3.25	1	Jan	2	Tue	17
1596	2023-01-03	17:28:50	2	8	Hell's Kitchen	37	3	Coffee	Barista Espresso	Espresso shot	6	1	Jan	2	Tue	17
1597	2023-01-03	17:30:08	1	3	Astoria	48	2.5	Tea	Brewed Black tea	English Breakfast Rg	2.5	1	Jan	2	Tue	17
1598	2023-01-03	17:32:11	1	8	Hell's Kitchen	59	4.5	Drinking Chocolate	Hot chocolate	Dark chocolate Lg	4.5	1	Jan	2	Tue	17
1599	2023-01-03	17:35:29	2	8	Hell's Kitchen	46	2.5	Tea	Brewed Green tea	Serenity Green Tea Rg	5	1	Jan	2	Tue	17
1600	2023-01-03	17:35:46	1	3	Astoria	50	2.5	Tea	Brewed Black tea	Earl Grey Rg	2.5	1	Jan	2	Tue	17
1601	2023-01-03	17:35:46	1	3	Astoria	69	3.25	Bakery	Biscotti	Hazelnut Biscotti	3.25	1	Jan	2	Tue	17
1602	2023-01-03	17:38:55	1	3	Astoria	50	2.5	Tea	Brewed Black tea	Earl Grey Rg	2.5	1	Jan	2	Tue	17
1603	2023-01-03	17:39:49	2	5	Lower Manhattan	39	4.25	Coffee	Barista Espresso	Latte Rg	8.5	1	Jan	2	Tue	17
1604	2023-01-03	17:40:08	1	8	Hell's Kitchen	24	3	Coffee	Drip coffee	Our Old Time Diner Blend Lg	3	1	Jan	2	Tue	17
1605	2023-01-03	17:40:15	1	3	Astoria	54	2.5	Tea	Brewed Chai tea	Morning Sunrise Chai Rg	2.5	1	Jan	2	Tue	17
1606	2023-01-03	17:41:27	1	3	Astoria	41	4.25	Coffee	Barista Espresso	Cappuccino Lg	4.25	1	Jan	2	Tue	17
1607	2023-01-03	17:42:13	1	3	Astoria	35	3.1	Coffee	Premium brewed coffee	Jamaican Coffee River Rg	3.1	1	Jan	2	Tue	17
1608	2023-01-03	17:42:34	2	5	Lower Manhattan	45	3	Tea	Brewed herbal tea	Peppermint Lg	6	1	Jan	2	Tue	17
1609	2023-01-03	17:44:32	1	3	Astoria	38	3.75	Coffee	Barista Espresso	Latte	3.75	1	Jan	2	Tue	17
1610	2023-01-03	17:53:41	1	3	Astoria	52	2.5	Tea	Brewed Chai tea	Traditional Blend Chai Rg	2.5	1	Jan	2	Tue	17
1611	2023-01-03	17:55:24	2	5	Lower Manhattan	58	3.5	Drinking Chocolate	Hot chocolate	Dark chocolate Rg	7	1	Jan	2	Tue	17
1612	2023-01-03	17:55:59	1	3	Astoria	31	2.2	Coffee	Gourmet brewed coffee	Ethiopia Sm	2.2	1	Jan	2	Tue	17
1613	2023-01-03	17:56:21	1	3	Astoria	38	3.75	Coffee	Barista Espresso	Latte	3.75	1	Jan	2	Tue	17
1614	2023-01-03	17:57:08	1	5	Lower Manhattan	51	3	Tea	Brewed Black tea	Earl Grey Lg	3	1	Jan	2	Tue	17
1615	2023-01-03	17:58:41	1	5	Lower Manhattan	51	3	Tea	Brewed Black tea	Earl Grey Lg	3	1	Jan	2	Tue	17
1616	2023-01-03	17:59:02	2	8	Hell's Kitchen	40	3.75	Coffee	Barista Espresso	Cappuccino	7.5	1	Jan	2	Tue	17
1617	2023-01-03	17:59:02	1	8	Hell's Kitchen	73	3.75	Bakery	Pastry	Almond Croissant	3.75	1	Jan	2	Tue	17
1618	2023-01-03	18:00:57	1	3	Astoria	39	4.25	Coffee	Barista Espresso	Latte Rg	4.25	1	Jan	2	Tue	18
1619	2023-01-03	18:01:19	2	3	Astoria	37	3	Coffee	Barista Espresso	Espresso shot	6	1	Jan	2	Tue	18
1620	2023-01-03	18:01:37	1	3	Astoria	49	3	Tea	Brewed Black tea	English Breakfast Lg	3	1	Jan	2	Tue	18
1621	2023-01-03	18:01:58	1	3	Astoria	42	2.5	Tea	Brewed herbal tea	Lemon Grass Rg	2.5	1	Jan	2	Tue	18
1622	2023-01-03	18:02:52	1	3	Astoria	30	3	Coffee	Gourmet brewed coffee	Columbian Medium Roast Lg	3	1	Jan	2	Tue	18
1623	2023-01-03	18:03:28	1	3	Astoria	31	2.2	Coffee	Gourmet brewed coffee	Ethiopia Sm	2.2	1	Jan	2	Tue	18
1624	2023-01-03	18:07:36	2	8	Hell's Kitchen	38	3.75	Coffee	Barista Espresso	Latte	7.5	1	Jan	2	Tue	18
1625	2023-01-03	18:07:48	2	3	Astoria	59	4.5	Drinking Chocolate	Hot chocolate	Dark chocolate Lg	9	1	Jan	2	Tue	18
1626	2023-01-03	18:12:02	1	3	Astoria	42	2.5	Tea	Brewed herbal tea	Lemon Grass Rg	2.5	1	Jan	2	Tue	18
1627	2023-01-03	18:14:14	1	3	Astoria	58	3.5	Drinking Chocolate	Hot chocolate	Dark chocolate Rg	3.5	1	Jan	2	Tue	18
1628	2023-01-03	18:16:50	2	3	Astoria	59	4.5	Drinking Chocolate	Hot chocolate	Dark chocolate Lg	9	1	Jan	2	Tue	18
1629	2023-01-03	18:17:17	1	5	Lower Manhattan	51	3	Tea	Brewed Black tea	Earl Grey Lg	3	1	Jan	2	Tue	18
1630	2023-01-03	18:17:17	1	5	Lower Manhattan	74	3.5	Bakery	Biscotti	Ginger Biscotti	3.5	1	Jan	2	Tue	18
1631	2023-01-03	18:18:00	2	8	Hell's Kitchen	31	2.2	Coffee	Gourmet brewed coffee	Ethiopia Sm	4.4	1	Jan	2	Tue	18
1632	2023-01-03	18:18:29	2	8	Hell's Kitchen	25	2.2	Coffee	Organic brewed coffee	Brazilian Sm	4.4	1	Jan	2	Tue	18
1633	2023-01-03	18:20:26	1	3	Astoria	57	3.1	Tea	Brewed Chai tea	Spicy Eye Opener Chai Lg	3.1	1	Jan	2	Tue	18
1634	2023-01-03	18:20:48	1	3	Astoria	47	3	Tea	Brewed Green tea	Serenity Green Tea Lg	3	1	Jan	2	Tue	18
1635	2023-01-03	18:22:37	2	3	Astoria	30	3	Coffee	Gourmet brewed coffee	Columbian Medium Roast Lg	6	1	Jan	2	Tue	18
1636	2023-01-03	18:26:13	2	3	Astoria	23	2.5	Coffee	Drip coffee	Our Old Time Diner Blend Rg	5	1	Jan	2	Tue	18
1637	2023-01-03	18:27:27	2	3	Astoria	51	3	Tea	Brewed Black tea	Earl Grey Lg	6	1	Jan	2	Tue	18
1638	2023-01-03	18:29:24	1	3	Astoria	25	2.2	Coffee	Organic brewed coffee	Brazilian Sm	2.2	1	Jan	2	Tue	18
1639	2023-01-03	18:30:40	1	3	Astoria	58	3.5	Drinking Chocolate	Hot chocolate	Dark chocolate Rg	3.5	1	Jan	2	Tue	18
1640	2023-01-03	18:32:23	1	8	Hell's Kitchen	43	3	Tea	Brewed herbal tea	Lemon Grass Lg	3	1	Jan	2	Tue	18
1641	2023-01-03	18:34:55	2	8	Hell's Kitchen	52	2.5	Tea	Brewed Chai tea	Traditional Blend Chai Rg	5	1	Jan	2	Tue	18
1642	2023-01-03	18:37:32	1	8	Hell's Kitchen	37	3	Coffee	Barista Espresso	Espresso shot	3	1	Jan	2	Tue	18
1643	2023-01-03	18:39:35	1	8	Hell's Kitchen	87	3	Coffee	Barista Espresso	Ouro Brasileiro shot	3	1	Jan	2	Tue	18
1644	2023-01-03	18:40:45	2	3	Astoria	35	3.1	Coffee	Premium brewed coffee	Jamaican Coffee River Rg	6.2	1	Jan	2	Tue	18
1645	2023-01-03	18:42:28	1	3	Astoria	39	4.25	Coffee	Barista Espresso	Latte Rg	4.25	1	Jan	2	Tue	18
1646	2023-01-03	18:44:21	2	8	Hell's Kitchen	27	3.5	Coffee	Organic brewed coffee	Brazilian Lg	7	1	Jan	2	Tue	18
1647	2023-01-03	18:44:21	1	8	Hell's Kitchen	75	3.5	Bakery	Pastry	Croissant	3.5	1	Jan	2	Tue	18
1648	2023-01-03	18:45:31	1	3	Astoria	56	2.55	Tea	Brewed Chai tea	Spicy Eye Opener Chai Rg	2.55	1	Jan	2	Tue	18
1649	2023-01-03	18:45:31	1	3	Astoria	79	3.75	Bakery	Scone	Jumbo Savory Scone	3.75	1	Jan	2	Tue	18
1650	2023-01-03	18:46:25	1	3	Astoria	32	3	Coffee	Gourmet brewed coffee	Ethiopia Rg	3	1	Jan	2	Tue	18
1651	2023-01-03	18:49:23	1	3	Astoria	41	4.25	Coffee	Barista Espresso	Cappuccino Lg	4.25	1	Jan	2	Tue	18
1652	2023-01-03	18:51:56	2	3	Astoria	53	3	Tea	Brewed Chai tea	Traditional Blend Chai Lg	6	1	Jan	2	Tue	18
1653	2023-01-03	18:54:16	1	8	Hell's Kitchen	48	2.5	Tea	Brewed Black tea	English Breakfast Rg	2.5	1	Jan	2	Tue	18
1654	2023-01-03	18:56:00	1	3	Astoria	39	4.25	Coffee	Barista Espresso	Latte Rg	4.25	1	Jan	2	Tue	18
1655	2023-01-03	18:57:29	1	3	Astoria	45	3	Tea	Brewed herbal tea	Peppermint Lg	3	1	Jan	2	Tue	18
1656	2023-01-03	18:58:53	2	3	Astoria	25	2.2	Coffee	Organic brewed coffee	Brazilian Sm	4.4	1	Jan	2	Tue	18
1657	2023-01-03	18:59:38	1	8	Hell's Kitchen	51	3	Tea	Brewed Black tea	Earl Grey Lg	3	1	Jan	2	Tue	18
1658	2023-01-03	19:00:13	1	3	Astoria	34	2.45	Coffee	Premium brewed coffee	Jamaican Coffee River Sm	2.45	1	Jan	2	Tue	19
1659	2023-01-03	19:05:02	1	8	Hell's Kitchen	49	3	Tea	Brewed Black tea	English Breakfast Lg	3	1	Jan	2	Tue	19
1660	2023-01-03	19:06:16	2	8	Hell's Kitchen	43	3	Tea	Brewed herbal tea	Lemon Grass Lg	6	1	Jan	2	Tue	19
1661	2023-01-03	19:07:24	1	3	Astoria	34	2.45	Coffee	Premium brewed coffee	Jamaican Coffee River Sm	2.45	1	Jan	2	Tue	19
1662	2023-01-03	19:07:24	1	3	Astoria	78	4.5	Bakery	Scone	Scottish Cream Scone	4.5	1	Jan	2	Tue	19
1663	2023-01-03	19:09:50	1	3	Astoria	50	2.5	Tea	Brewed Black tea	Earl Grey Rg	2.5	1	Jan	2	Tue	19
1664	2023-01-03	19:10:40	1	3	Astoria	60	3.75	Drinking Chocolate	Hot chocolate	Sustainably Grown Organic Rg	3.75	1	Jan	2	Tue	19
1665	2023-01-03	19:11:11	1	3	Astoria	55	4	Tea	Brewed Chai tea	Morning Sunrise Chai Lg	4	1	Jan	2	Tue	19
1666	2023-01-03	19:11:11	1	3	Astoria	71	3.75	Bakery	Pastry	Chocolate Croissant	3.75	1	Jan	2	Tue	19
1667	2023-01-03	19:14:00	1	3	Astoria	48	2.5	Tea	Brewed Black tea	English Breakfast Rg	2.5	1	Jan	2	Tue	19
1668	2023-01-03	19:15:30	1	3	Astoria	53	3	Tea	Brewed Chai tea	Traditional Blend Chai Lg	3	1	Jan	2	Tue	19
1669	2023-01-03	19:19:16	1	3	Astoria	29	2.5	Coffee	Gourmet brewed coffee	Columbian Medium Roast Rg	2.5	1	Jan	2	Tue	19
1670	2023-01-03	19:19:20	1	8	Hell's Kitchen	35	3.1	Coffee	Premium brewed coffee	Jamaican Coffee River Rg	3.1	1	Jan	2	Tue	19
1671	2023-01-03	19:21:51	2	8	Hell's Kitchen	27	3.5	Coffee	Organic brewed coffee	Brazilian Lg	7	1	Jan	2	Tue	19
1672	2023-01-03	19:22:36	2	8	Hell's Kitchen	50	2.5	Tea	Brewed Black tea	Earl Grey Rg	5	1	Jan	2	Tue	19
1673	2023-01-03	19:23:06	1	3	Astoria	54	2.5	Tea	Brewed Chai tea	Morning Sunrise Chai Rg	2.5	1	Jan	2	Tue	19
1674	2023-01-03	19:23:22	2	8	Hell's Kitchen	61	4.75	Drinking Chocolate	Hot chocolate	Sustainably Grown Organic Lg	9.5	1	Jan	2	Tue	19
1675	2023-01-03	19:25:19	1	3	Astoria	34	2.45	Coffee	Premium brewed coffee	Jamaican Coffee River Sm	2.45	1	Jan	2	Tue	19
1676	2023-01-03	19:27:38	2	8	Hell's Kitchen	44	2.5	Tea	Brewed herbal tea	Peppermint Rg	5	1	Jan	2	Tue	19
1677	2023-01-03	19:31:40	1	3	Astoria	46	2.5	Tea	Brewed Green tea	Serenity Green Tea Rg	2.5	1	Jan	2	Tue	19
1678	2023-01-03	19:31:40	1	3	Astoria	71	3.75	Bakery	Pastry	Chocolate Croissant	3.75	1	Jan	2	Tue	19
1679	2023-01-03	19:32:22	1	8	Hell's Kitchen	46	2.5	Tea	Brewed Green tea	Serenity Green Tea Rg	2.5	1	Jan	2	Tue	19
1680	2023-01-03	19:33:51	2	3	Astoria	47	3	Tea	Brewed Green tea	Serenity Green Tea Lg	6	1	Jan	2	Tue	19
1681	2023-01-03	19:35:27	1	3	Astoria	32	3	Coffee	Gourmet brewed coffee	Ethiopia Rg	3	1	Jan	2	Tue	19
1682	2023-01-03	19:35:54	1	8	Hell's Kitchen	61	4.75	Drinking Chocolate	Hot chocolate	Sustainably Grown Organic Lg	4.75	1	Jan	2	Tue	19
1683	2023-01-03	19:37:44	1	3	Astoria	46	2.5	Tea	Brewed Green tea	Serenity Green Tea Rg	2.5	1	Jan	2	Tue	19
1684	2023-01-03	19:38:33	2	3	Astoria	22	2	Coffee	Drip coffee	Our Old Time Diner Blend Sm	4	1	Jan	2	Tue	19
1685	2023-01-03	19:39:21	2	3	Astoria	61	4.75	Drinking Chocolate	Hot chocolate	Sustainably Grown Organic Lg	9.5	1	Jan	2	Tue	19
1686	2023-01-03	19:40:09	1	8	Hell's Kitchen	57	3.1	Tea	Brewed Chai tea	Spicy Eye Opener Chai Lg	3.1	1	Jan	2	Tue	19
1687	2023-01-03	19:40:35	2	8	Hell's Kitchen	25	2.2	Coffee	Organic brewed coffee	Brazilian Sm	4.4	1	Jan	2	Tue	19
1688	2023-01-03	19:49:19	2	8	Hell's Kitchen	34	2.45	Coffee	Premium brewed coffee	Jamaican Coffee River Sm	4.9	1	Jan	2	Tue	19
1689	2023-01-03	19:49:19	1	8	Hell's Kitchen	79	3.75	Bakery	Scone	Jumbo Savory Scone	3.75	1	Jan	2	Tue	19
1690	2023-01-03	19:50:56	1	3	Astoria	61	4.75	Drinking Chocolate	Hot chocolate	Sustainably Grown Organic Lg	4.75	1	Jan	2	Tue	19
1691	2023-01-03	19:50:56	1	3	Astoria	72	3.25	Bakery	Scone	Ginger Scone	3.25	1	Jan	2	Tue	19
1692	2023-01-03	19:52:04	2	3	Astoria	39	4.25	Coffee	Barista Espresso	Latte Rg	8.5	1	Jan	2	Tue	19
1693	2023-01-03	19:52:34	2	8	Hell's Kitchen	61	4.75	Drinking Chocolate	Hot chocolate	Sustainably Grown Organic Lg	9.5	1	Jan	2	Tue	19
1694	2023-01-03	19:53:30	1	3	Astoria	29	2.5	Coffee	Gourmet brewed coffee	Columbian Medium Roast Rg	2.5	1	Jan	2	Tue	19
1695	2023-01-03	19:53:30	1	3	Astoria	72	3.25	Bakery	Scone	Ginger Scone	3.25	1	Jan	2	Tue	19
1696	2023-01-03	19:54:02	1	8	Hell's Kitchen	56	2.55	Tea	Brewed Chai tea	Spicy Eye Opener Chai Rg	2.55	1	Jan	2	Tue	19
1697	2023-01-03	19:58:26	2	8	Hell's Kitchen	52	2.5	Tea	Brewed Chai tea	Traditional Blend Chai Rg	5	1	Jan	2	Tue	19
1698	2023-01-03	19:59:36	1	3	Astoria	33	3.5	Coffee	Gourmet brewed coffee	Ethiopia Lg	3.5	1	Jan	2	Tue	19
1699	2023-01-04	07:09:20	1	5	Lower Manhattan	22	2	Coffee	Drip coffee	Our Old Time Diner Blend Sm	2	1	Jan	3	Wed	7
1700	2023-01-04	07:12:12	1	5	Lower Manhattan	42	2.5	Tea	Brewed herbal tea	Lemon Grass Rg	2.5	1	Jan	3	Wed	7
1701	2023-01-04	07:15:38	1	5	Lower Manhattan	30	3	Coffee	Gourmet brewed coffee	Columbian Medium Roast Lg	3	1	Jan	3	Wed	7
1702	2023-01-04	07:30:48	1	5	Lower Manhattan	31	2.2	Coffee	Gourmet brewed coffee	Ethiopia Sm	2.2	1	Jan	3	Wed	7
1703	2023-01-04	07:35:22	1	5	Lower Manhattan	45	3	Tea	Brewed herbal tea	Peppermint Lg	3	1	Jan	3	Wed	7
1704	2023-01-04	07:35:22	1	5	Lower Manhattan	73	3.75	Bakery	Pastry	Almond Croissant	3.75	1	Jan	3	Wed	7
1705	2023-01-04	07:40:18	2	5	Lower Manhattan	58	3.5	Drinking Chocolate	Hot chocolate	Dark chocolate Rg	7	1	Jan	3	Wed	7
1706	2023-01-04	07:40:18	1	5	Lower Manhattan	72	3.25	Bakery	Scone	Ginger Scone	3.25	1	Jan	3	Wed	7
1707	2023-01-04	07:49:49	2	5	Lower Manhattan	23	2.5	Coffee	Drip coffee	Our Old Time Diner Blend Rg	5	1	Jan	3	Wed	7
1708	2023-01-04	08:03:34	2	8	Hell's Kitchen	29	2.5	Coffee	Gourmet brewed coffee	Columbian Medium Roast Rg	5	1	Jan	3	Wed	8
1709	2023-01-04	08:03:34	1	8	Hell's Kitchen	72	3.25	Bakery	Scone	Ginger Scone	3.25	1	Jan	3	Wed	8
1710	2023-01-04	08:06:13	1	8	Hell's Kitchen	61	4.75	Drinking Chocolate	Hot chocolate	Sustainably Grown Organic Lg	4.75	1	Jan	3	Wed	8
1711	2023-01-04	08:06:13	1	8	Hell's Kitchen	72	3.25	Bakery	Scone	Ginger Scone	3.25	1	Jan	3	Wed	8
1712	2023-01-04	08:09:05	2	8	Hell's Kitchen	25	2.2	Coffee	Organic brewed coffee	Brazilian Sm	4.4	1	Jan	3	Wed	8
1713	2023-01-04	08:14:55	2	8	Hell's Kitchen	58	3.5	Drinking Chocolate	Hot chocolate	Dark chocolate Rg	7	1	Jan	3	Wed	8
1714	2023-01-04	08:16:20	1	5	Lower Manhattan	22	2	Coffee	Drip coffee	Our Old Time Diner Blend Sm	2	1	Jan	3	Wed	8
1715	2023-01-04	08:18:32	1	8	Hell's Kitchen	46	2.5	Tea	Brewed Green tea	Serenity Green Tea Rg	2.5	1	Jan	3	Wed	8
1716	2023-01-04	08:18:32	1	8	Hell's Kitchen	79	3.75	Bakery	Scone	Jumbo Savory Scone	3.75	1	Jan	3	Wed	8
1717	2023-01-04	08:25:05	1	8	Hell's Kitchen	32	3	Coffee	Gourmet brewed coffee	Ethiopia Rg	3	1	Jan	3	Wed	8
1718	2023-01-04	08:28:18	2	5	Lower Manhattan	50	2.5	Tea	Brewed Black tea	Earl Grey Rg	5	1	Jan	3	Wed	8
1719	2023-01-04	08:29:19	1	5	Lower Manhattan	27	3.5	Coffee	Organic brewed coffee	Brazilian Lg	3.5	1	Jan	3	Wed	8
1720	2023-01-04	08:30:16	2	8	Hell's Kitchen	27	3.5	Coffee	Organic brewed coffee	Brazilian Lg	7	1	Jan	3	Wed	8
1721	2023-01-04	08:31:15	1	5	Lower Manhattan	61	4.75	Drinking Chocolate	Hot chocolate	Sustainably Grown Organic Lg	4.75	1	Jan	3	Wed	8
1722	2023-01-04	08:32:18	2	5	Lower Manhattan	54	2.5	Tea	Brewed Chai tea	Morning Sunrise Chai Rg	5	1	Jan	3	Wed	8
1723	2023-01-04	08:32:18	1	5	Lower Manhattan	71	3.75	Bakery	Pastry	Chocolate Croissant	3.75	1	Jan	3	Wed	8
1724	2023-01-04	08:37:10	1	8	Hell's Kitchen	46	2.5	Tea	Brewed Green tea	Serenity Green Tea Rg	2.5	1	Jan	3	Wed	8
1725	2023-01-04	08:37:14	1	8	Hell's Kitchen	40	3.75	Coffee	Barista Espresso	Cappuccino	3.75	1	Jan	3	Wed	8
1726	2023-01-04	08:38:20	1	8	Hell's Kitchen	47	3	Tea	Brewed Green tea	Serenity Green Tea Lg	3	1	Jan	3	Wed	8
1727	2023-01-04	08:42:10	2	5	Lower Manhattan	28	2	Coffee	Gourmet brewed coffee	Columbian Medium Roast Sm	4	1	Jan	3	Wed	8
1728	2023-01-04	08:43:01	1	8	Hell's Kitchen	44	2.5	Tea	Brewed herbal tea	Peppermint Rg	2.5	1	Jan	3	Wed	8
1729	2023-01-04	08:43:10	2	8	Hell's Kitchen	29	2.5	Coffee	Gourmet brewed coffee	Columbian Medium Roast Rg	5	1	Jan	3	Wed	8
1730	2023-01-04	08:44:26	2	8	Hell's Kitchen	27	3.5	Coffee	Organic brewed coffee	Brazilian Lg	7	1	Jan	3	Wed	8
1731	2023-01-04	08:45:29	2	8	Hell's Kitchen	52	2.5	Tea	Brewed Chai tea	Traditional Blend Chai Rg	5	1	Jan	3	Wed	8
1732	2023-01-04	08:53:36	1	5	Lower Manhattan	39	4.25	Coffee	Barista Espresso	Latte Rg	4.25	1	Jan	3	Wed	8
1733	2023-01-04	08:58:38	1	8	Hell's Kitchen	22	2	Coffee	Drip coffee	Our Old Time Diner Blend Sm	2	1	Jan	3	Wed	8
1734	2023-01-04	09:01:37	2	8	Hell's Kitchen	35	3.1	Coffee	Premium brewed coffee	Jamaican Coffee River Rg	6.2	1	Jan	3	Wed	9
1735	2023-01-04	09:04:45	2	5	Lower Manhattan	44	2.5	Tea	Brewed herbal tea	Peppermint Rg	5	1	Jan	3	Wed	9
1736	2023-01-04	09:06:58	2	5	Lower Manhattan	55	4	Tea	Brewed Chai tea	Morning Sunrise Chai Lg	8	1	Jan	3	Wed	9
1737	2023-01-04	09:08:30	2	8	Hell's Kitchen	42	2.5	Tea	Brewed herbal tea	Lemon Grass Rg	5	1	Jan	3	Wed	9
1738	2023-01-04	09:11:25	1	5	Lower Manhattan	25	2.2	Coffee	Organic brewed coffee	Brazilian Sm	2.2	1	Jan	3	Wed	9
1739	2023-01-04	09:16:58	1	5	Lower Manhattan	44	2.5	Tea	Brewed herbal tea	Peppermint Rg	2.5	1	Jan	3	Wed	9
1740	2023-01-04	09:16:58	1	5	Lower Manhattan	76	3.5	Bakery	Biscotti	Chocolate Chip Biscotti	3.5	1	Jan	3	Wed	9
1741	2023-01-04	09:21:25	2	5	Lower Manhattan	50	2.5	Tea	Brewed Black tea	Earl Grey Rg	5	1	Jan	3	Wed	9
1742	2023-01-04	09:23:19	1	8	Hell's Kitchen	44	2.5	Tea	Brewed herbal tea	Peppermint Rg	2.5	1	Jan	3	Wed	9
1743	2023-01-04	09:30:16	2	8	Hell's Kitchen	51	3	Tea	Brewed Black tea	Earl Grey Lg	6	1	Jan	3	Wed	9
1744	2023-01-04	09:38:54	1	8	Hell's Kitchen	25	2.2	Coffee	Organic brewed coffee	Brazilian Sm	2.2	1	Jan	3	Wed	9
1745	2023-01-04	09:40:25	2	5	Lower Manhattan	36	3.75	Coffee	Premium brewed coffee	Jamaican Coffee River Lg	7.5	1	Jan	3	Wed	9
1746	2023-01-04	09:40:45	2	5	Lower Manhattan	52	2.5	Tea	Brewed Chai tea	Traditional Blend Chai Rg	5	1	Jan	3	Wed	9
1747	2023-01-04	09:42:42	2	5	Lower Manhattan	26	3	Coffee	Organic brewed coffee	Brazilian Rg	6	1	Jan	3	Wed	9
1748	2023-01-04	09:44:40	1	8	Hell's Kitchen	26	3	Coffee	Organic brewed coffee	Brazilian Rg	3	1	Jan	3	Wed	9
1749	2023-01-04	09:50:48	1	5	Lower Manhattan	50	2.5	Tea	Brewed Black tea	Earl Grey Rg	2.5	1	Jan	3	Wed	9
1750	2023-01-04	09:53:31	2	8	Hell's Kitchen	35	3.1	Coffee	Premium brewed coffee	Jamaican Coffee River Rg	6.2	1	Jan	3	Wed	9
1751	2023-01-04	09:53:44	1	8	Hell's Kitchen	32	3	Coffee	Gourmet brewed coffee	Ethiopia Rg	3	1	Jan	3	Wed	9
1752	2023-01-04	09:56:07	2	8	Hell's Kitchen	39	4.25	Coffee	Barista Espresso	Latte Rg	8.5	1	Jan	3	Wed	9
1753	2023-01-04	09:56:35	2	5	Lower Manhattan	54	2.5	Tea	Brewed Chai tea	Morning Sunrise Chai Rg	5	1	Jan	3	Wed	9
1754	2023-01-04	09:56:35	1	5	Lower Manhattan	72	3.25	Bakery	Scone	Ginger Scone	3.25	1	Jan	3	Wed	9
1755	2023-01-04	09:57:39	1	5	Lower Manhattan	43	3	Tea	Brewed herbal tea	Lemon Grass Lg	3	1	Jan	3	Wed	9
1756	2023-01-04	09:58:10	1	8	Hell's Kitchen	31	2.2	Coffee	Gourmet brewed coffee	Ethiopia Sm	2.2	1	Jan	3	Wed	9
1757	2023-01-04	10:01:39	1	8	Hell's Kitchen	48	2.5	Tea	Brewed Black tea	English Breakfast Rg	2.5	1	Jan	3	Wed	10
1758	2023-01-04	10:03:45	1	5	Lower Manhattan	47	3	Tea	Brewed Green tea	Serenity Green Tea Lg	3	1	Jan	3	Wed	10
1759	2023-01-04	10:04:51	2	8	Hell's Kitchen	34	2.45	Coffee	Premium brewed coffee	Jamaican Coffee River Sm	4.9	1	Jan	3	Wed	10
1760	2023-01-04	10:05:03	2	5	Lower Manhattan	35	3.1	Coffee	Premium brewed coffee	Jamaican Coffee River Rg	6.2	1	Jan	3	Wed	10
1761	2023-01-04	10:05:03	1	5	Lower Manhattan	69	3.25	Bakery	Biscotti	Hazelnut Biscotti	3.25	1	Jan	3	Wed	10
1762	2023-01-04	10:13:21	2	8	Hell's Kitchen	55	4	Tea	Brewed Chai tea	Morning Sunrise Chai Lg	8	1	Jan	3	Wed	10
1763	2023-01-04	10:13:38	1	8	Hell's Kitchen	55	4	Tea	Brewed Chai tea	Morning Sunrise Chai Lg	4	1	Jan	3	Wed	10
1764	2023-01-04	10:18:40	2	5	Lower Manhattan	51	3	Tea	Brewed Black tea	Earl Grey Lg	6	1	Jan	3	Wed	10
1765	2023-01-04	10:18:58	1	8	Hell's Kitchen	51	3	Tea	Brewed Black tea	Earl Grey Lg	3	1	Jan	3	Wed	10
1766	2023-01-04	10:19:21	2	8	Hell's Kitchen	87	3	Coffee	Barista Espresso	Ouro Brasileiro shot	6	1	Jan	3	Wed	10
1767	2023-01-04	10:22:16	1	8	Hell's Kitchen	57	3.1	Tea	Brewed Chai tea	Spicy Eye Opener Chai Lg	3.1	1	Jan	3	Wed	10
1768	2023-01-04	10:24:25	2	5	Lower Manhattan	24	3	Coffee	Drip coffee	Our Old Time Diner Blend Lg	6	1	Jan	3	Wed	10
1769	2023-01-04	10:24:38	2	5	Lower Manhattan	56	2.55	Tea	Brewed Chai tea	Spicy Eye Opener Chai Rg	5.1	1	Jan	3	Wed	10
1770	2023-01-04	10:27:54	2	5	Lower Manhattan	46	2.5	Tea	Brewed Green tea	Serenity Green Tea Rg	5	1	Jan	3	Wed	10
1771	2023-01-04	10:27:54	1	5	Lower Manhattan	71	3.75	Bakery	Pastry	Chocolate Croissant	3.75	1	Jan	3	Wed	10
1772	2023-01-04	10:28:27	2	8	Hell's Kitchen	39	4.25	Coffee	Barista Espresso	Latte Rg	8.5	1	Jan	3	Wed	10
1773	2023-01-04	10:40:09	2	8	Hell's Kitchen	33	3.5	Coffee	Gourmet brewed coffee	Ethiopia Lg	7	1	Jan	3	Wed	10
1774	2023-01-04	10:43:20	1	5	Lower Manhattan	54	2.5	Tea	Brewed Chai tea	Morning Sunrise Chai Rg	2.5	1	Jan	3	Wed	10
1775	2023-01-04	11:01:13	2	3	Astoria	31	2.2	Coffee	Gourmet brewed coffee	Ethiopia Sm	4.4	1	Jan	3	Wed	11
1776	2023-01-04	11:01:26	2	8	Hell's Kitchen	28	2	Coffee	Gourmet brewed coffee	Columbian Medium Roast Sm	4	1	Jan	3	Wed	11
1777	2023-01-04	11:01:28	1	8	Hell's Kitchen	27	3.5	Coffee	Organic brewed coffee	Brazilian Lg	3.5	1	Jan	3	Wed	11
1778	2023-01-04	11:01:48	1	3	Astoria	58	3.5	Drinking Chocolate	Hot chocolate	Dark chocolate Rg	3.5	1	Jan	3	Wed	11
1779	2023-01-04	11:01:48	1	3	Astoria	71	3.75	Bakery	Pastry	Chocolate Croissant	3.75	1	Jan	3	Wed	11
1780	2023-01-04	11:06:08	2	3	Astoria	60	3.75	Drinking Chocolate	Hot chocolate	Sustainably Grown Organic Rg	7.5	1	Jan	3	Wed	11
1781	2023-01-04	11:11:40	1	5	Lower Manhattan	59	4.5	Drinking Chocolate	Hot chocolate	Dark chocolate Lg	4.5	1	Jan	3	Wed	11
1782	2023-01-04	11:11:46	1	5	Lower Manhattan	24	3	Coffee	Drip coffee	Our Old Time Diner Blend Lg	3	1	Jan	3	Wed	11
1783	2023-01-04	11:11:58	1	5	Lower Manhattan	30	3	Coffee	Gourmet brewed coffee	Columbian Medium Roast Lg	3	1	Jan	3	Wed	11
1784	2023-01-04	11:12:15	2	8	Hell's Kitchen	50	2.5	Tea	Brewed Black tea	Earl Grey Rg	5	1	Jan	3	Wed	11
1785	2023-01-04	11:12:51	2	3	Astoria	39	4.25	Coffee	Barista Espresso	Latte Rg	8.5	1	Jan	3	Wed	11
1786	2023-01-04	11:14:39	2	8	Hell's Kitchen	45	3	Tea	Brewed herbal tea	Peppermint Lg	6	1	Jan	3	Wed	11
1787	2023-01-04	11:14:39	1	8	Hell's Kitchen	74	3.5	Bakery	Biscotti	Ginger Biscotti	3.5	1	Jan	3	Wed	11
1788	2023-01-04	11:21:23	2	8	Hell's Kitchen	24	3	Coffee	Drip coffee	Our Old Time Diner Blend Lg	6	1	Jan	3	Wed	11
1789	2023-01-04	11:21:27	2	8	Hell's Kitchen	59	4.5	Drinking Chocolate	Hot chocolate	Dark chocolate Lg	9	1	Jan	3	Wed	11
1790	2023-01-04	11:22:35	2	8	Hell's Kitchen	44	2.5	Tea	Brewed herbal tea	Peppermint Rg	5	1	Jan	3	Wed	11
1791	2023-01-04	11:22:36	2	8	Hell's Kitchen	29	2.5	Coffee	Gourmet brewed coffee	Columbian Medium Roast Rg	5	1	Jan	3	Wed	11
1792	2023-01-04	11:24:28	2	3	Astoria	46	2.5	Tea	Brewed Green tea	Serenity Green Tea Rg	5	1	Jan	3	Wed	11
1793	2023-01-04	11:26:14	1	3	Astoria	44	2.5	Tea	Brewed herbal tea	Peppermint Rg	2.5	1	Jan	3	Wed	11
1794	2023-01-04	11:27:20	1	8	Hell's Kitchen	23	2.5	Coffee	Drip coffee	Our Old Time Diner Blend Rg	2.5	1	Jan	3	Wed	11
1795	2023-01-04	11:28:10	1	8	Hell's Kitchen	61	4.75	Drinking Chocolate	Hot chocolate	Sustainably Grown Organic Lg	4.75	1	Jan	3	Wed	11
1796	2023-01-04	11:28:10	1	8	Hell's Kitchen	79	3.75	Bakery	Scone	Jumbo Savory Scone	3.75	1	Jan	3	Wed	11
1797	2023-01-04	11:28:17	1	3	Astoria	56	2.55	Tea	Brewed Chai tea	Spicy Eye Opener Chai Rg	2.55	1	Jan	3	Wed	11
1798	2023-01-04	11:28:26	2	5	Lower Manhattan	22	2	Coffee	Drip coffee	Our Old Time Diner Blend Sm	4	1	Jan	3	Wed	11
1799	2023-01-04	11:28:26	1	5	Lower Manhattan	71	3.75	Bakery	Pastry	Chocolate Croissant	3.75	1	Jan	3	Wed	11
1800	2023-01-04	11:29:36	2	5	Lower Manhattan	36	3.75	Coffee	Premium brewed coffee	Jamaican Coffee River Lg	7.5	1	Jan	3	Wed	11
1801	2023-01-04	11:31:06	2	8	Hell's Kitchen	29	2.5	Coffee	Gourmet brewed coffee	Columbian Medium Roast Rg	5	1	Jan	3	Wed	11
1802	2023-01-04	11:31:26	1	3	Astoria	31	2.2	Coffee	Gourmet brewed coffee	Ethiopia Sm	2.2	1	Jan	3	Wed	11
1803	2023-01-04	11:33:32	1	8	Hell's Kitchen	56	2.55	Tea	Brewed Chai tea	Spicy Eye Opener Chai Rg	2.55	1	Jan	3	Wed	11
1804	2023-01-04	11:38:25	2	3	Astoria	23	2.5	Coffee	Drip coffee	Our Old Time Diner Blend Rg	5	1	Jan	3	Wed	11
1805	2023-01-04	11:39:47	1	8	Hell's Kitchen	26	3	Coffee	Organic brewed coffee	Brazilian Rg	3	1	Jan	3	Wed	11
1806	2023-01-04	11:40:03	1	3	Astoria	30	3	Coffee	Gourmet brewed coffee	Columbian Medium Roast Lg	3	1	Jan	3	Wed	11
1807	2023-01-04	11:42:48	1	3	Astoria	55	4	Tea	Brewed Chai tea	Morning Sunrise Chai Lg	4	1	Jan	3	Wed	11
1808	2023-01-04	11:44:07	2	3	Astoria	24	3	Coffee	Drip coffee	Our Old Time Diner Blend Lg	6	1	Jan	3	Wed	11
1809	2023-01-04	11:46:45	2	8	Hell's Kitchen	40	3.75	Coffee	Barista Espresso	Cappuccino	7.5	1	Jan	3	Wed	11
1810	2023-01-04	11:48:07	2	3	Astoria	26	3	Coffee	Organic brewed coffee	Brazilian Rg	6	1	Jan	3	Wed	11
1811	2023-01-04	11:51:42	1	8	Hell's Kitchen	38	3.75	Coffee	Barista Espresso	Latte	3.75	1	Jan	3	Wed	11
1812	2023-01-04	11:52:23	2	8	Hell's Kitchen	34	2.45	Coffee	Premium brewed coffee	Jamaican Coffee River Sm	4.9	1	Jan	3	Wed	11
1813	2023-01-04	11:55:06	2	5	Lower Manhattan	47	3	Tea	Brewed Green tea	Serenity Green Tea Lg	6	1	Jan	3	Wed	11
1814	2023-01-04	11:56:32	2	3	Astoria	39	4.25	Coffee	Barista Espresso	Latte Rg	8.5	1	Jan	3	Wed	11
1815	2023-01-04	11:57:34	2	8	Hell's Kitchen	49	3	Tea	Brewed Black tea	English Breakfast Lg	6	1	Jan	3	Wed	11
1816	2023-01-04	11:59:01	2	8	Hell's Kitchen	40	3.75	Coffee	Barista Espresso	Cappuccino	7.5	1	Jan	3	Wed	11
1817	2023-01-04	11:59:01	1	8	Hell's Kitchen	74	3.5	Bakery	Biscotti	Ginger Biscotti	3.5	1	Jan	3	Wed	11
1818	2023-01-04	11:59:26	1	5	Lower Manhattan	29	2.5	Coffee	Gourmet brewed coffee	Columbian Medium Roast Rg	2.5	1	Jan	3	Wed	11
1819	2023-01-04	12:00:11	1	5	Lower Manhattan	87	3	Coffee	Barista Espresso	Ouro Brasileiro shot	3	1	Jan	3	Wed	12
1820	2023-01-04	12:00:11	1	5	Lower Manhattan	77	3	Bakery	Scone	Oatmeal Scone	3	1	Jan	3	Wed	12
1821	2023-01-04	12:00:58	2	3	Astoria	34	2.45	Coffee	Premium brewed coffee	Jamaican Coffee River Sm	4.9	1	Jan	3	Wed	12
1822	2023-01-04	12:01:42	2	3	Astoria	55	4	Tea	Brewed Chai tea	Morning Sunrise Chai Lg	8	1	Jan	3	Wed	12
1823	2023-01-04	12:02:09	2	3	Astoria	55	4	Tea	Brewed Chai tea	Morning Sunrise Chai Lg	8	1	Jan	3	Wed	12
1824	2023-01-04	12:02:52	2	5	Lower Manhattan	45	3	Tea	Brewed herbal tea	Peppermint Lg	6	1	Jan	3	Wed	12
1825	2023-01-04	12:04:48	1	8	Hell's Kitchen	46	2.5	Tea	Brewed Green tea	Serenity Green Tea Rg	2.5	1	Jan	3	Wed	12
1826	2023-01-04	12:04:58	1	5	Lower Manhattan	28	2	Coffee	Gourmet brewed coffee	Columbian Medium Roast Sm	2	1	Jan	3	Wed	12
1827	2023-01-04	12:05:50	2	8	Hell's Kitchen	87	3	Coffee	Barista Espresso	Ouro Brasileiro shot	6	1	Jan	3	Wed	12
1828	2023-01-04	12:05:53	2	3	Astoria	56	2.55	Tea	Brewed Chai tea	Spicy Eye Opener Chai Rg	5.1	1	Jan	3	Wed	12
1829	2023-01-04	12:07:44	2	3	Astoria	30	3	Coffee	Gourmet brewed coffee	Columbian Medium Roast Lg	6	1	Jan	3	Wed	12
1830	2023-01-04	12:07:51	2	3	Astoria	35	3.1	Coffee	Premium brewed coffee	Jamaican Coffee River Rg	6.2	1	Jan	3	Wed	12
1831	2023-01-04	12:07:51	1	3	Astoria	73	3.75	Bakery	Pastry	Almond Croissant	3.75	1	Jan	3	Wed	12
1832	2023-01-04	12:07:52	1	3	Astoria	37	3	Coffee	Barista Espresso	Espresso shot	3	1	Jan	3	Wed	12
1833	2023-01-04	12:07:52	1	3	Astoria	76	3.5	Bakery	Biscotti	Chocolate Chip Biscotti	3.5	1	Jan	3	Wed	12
1834	2023-01-04	12:09:31	2	8	Hell's Kitchen	26	3	Coffee	Organic brewed coffee	Brazilian Rg	6	1	Jan	3	Wed	12
1835	2023-01-04	12:10:02	2	5	Lower Manhattan	45	3	Tea	Brewed herbal tea	Peppermint Lg	6	1	Jan	3	Wed	12
1836	2023-01-04	12:11:39	1	5	Lower Manhattan	27	3.5	Coffee	Organic brewed coffee	Brazilian Lg	3.5	1	Jan	3	Wed	12
1837	2023-01-04	12:11:39	1	5	Lower Manhattan	71	3.75	Bakery	Pastry	Chocolate Croissant	3.75	1	Jan	3	Wed	12
1838	2023-01-04	12:12:00	1	3	Astoria	36	3.75	Coffee	Premium brewed coffee	Jamaican Coffee River Lg	3.75	1	Jan	3	Wed	12
1839	2023-01-04	12:14:53	1	5	Lower Manhattan	45	3	Tea	Brewed herbal tea	Peppermint Lg	3	1	Jan	3	Wed	12
1840	2023-01-04	12:15:32	1	8	Hell's Kitchen	40	3.75	Coffee	Barista Espresso	Cappuccino	3.75	1	Jan	3	Wed	12
1841	2023-01-04	12:16:10	2	5	Lower Manhattan	50	2.5	Tea	Brewed Black tea	Earl Grey Rg	5	1	Jan	3	Wed	12
1842	2023-01-04	12:16:32	2	3	Astoria	58	3.5	Drinking Chocolate	Hot chocolate	Dark chocolate Rg	7	1	Jan	3	Wed	12
1843	2023-01-04	12:17:21	2	5	Lower Manhattan	52	2.5	Tea	Brewed Chai tea	Traditional Blend Chai Rg	5	1	Jan	3	Wed	12
1844	2023-01-04	12:17:51	1	3	Astoria	24	3	Coffee	Drip coffee	Our Old Time Diner Blend Lg	3	1	Jan	3	Wed	12
1845	2023-01-04	12:18:15	1	3	Astoria	46	2.5	Tea	Brewed Green tea	Serenity Green Tea Rg	2.5	1	Jan	3	Wed	12
1846	2023-01-04	12:20:07	1	3	Astoria	31	2.2	Coffee	Gourmet brewed coffee	Ethiopia Sm	2.2	1	Jan	3	Wed	12
1847	2023-01-04	12:20:52	1	3	Astoria	59	4.5	Drinking Chocolate	Hot chocolate	Dark chocolate Lg	4.5	1	Jan	3	Wed	12
1848	2023-01-04	12:20:52	1	3	Astoria	71	3.75	Bakery	Pastry	Chocolate Croissant	3.75	1	Jan	3	Wed	12
1849	2023-01-04	12:23:16	1	8	Hell's Kitchen	48	2.5	Tea	Brewed Black tea	English Breakfast Rg	2.5	1	Jan	3	Wed	12
1850	2023-01-04	12:23:21	2	3	Astoria	34	2.45	Coffee	Premium brewed coffee	Jamaican Coffee River Sm	4.9	1	Jan	3	Wed	12
1851	2023-01-04	12:23:34	2	5	Lower Manhattan	40	3.75	Coffee	Barista Espresso	Cappuccino	7.5	1	Jan	3	Wed	12
1852	2023-01-04	12:28:36	2	3	Astoria	59	4.5	Drinking Chocolate	Hot chocolate	Dark chocolate Lg	9	1	Jan	3	Wed	12
1853	2023-01-04	12:28:49	2	3	Astoria	38	3.75	Coffee	Barista Espresso	Latte	7.5	1	Jan	3	Wed	12
1854	2023-01-04	12:29:24	2	3	Astoria	26	3	Coffee	Organic brewed coffee	Brazilian Rg	6	1	Jan	3	Wed	12
1855	2023-01-04	12:30:36	1	3	Astoria	52	2.5	Tea	Brewed Chai tea	Traditional Blend Chai Rg	2.5	1	Jan	3	Wed	12
1856	2023-01-04	12:30:36	1	3	Astoria	69	3.25	Bakery	Biscotti	Hazelnut Biscotti	3.25	1	Jan	3	Wed	12
1857	2023-01-04	12:31:19	2	3	Astoria	23	2.5	Coffee	Drip coffee	Our Old Time Diner Blend Rg	5	1	Jan	3	Wed	12
1858	2023-01-04	12:34:06	2	8	Hell's Kitchen	37	3	Coffee	Barista Espresso	Espresso shot	6	1	Jan	3	Wed	12
1859	2023-01-04	12:34:32	2	8	Hell's Kitchen	44	2.5	Tea	Brewed herbal tea	Peppermint Rg	5	1	Jan	3	Wed	12
1860	2023-01-04	12:35:16	1	8	Hell's Kitchen	60	3.75	Drinking Chocolate	Hot chocolate	Sustainably Grown Organic Rg	3.75	1	Jan	3	Wed	12
1861	2023-01-04	12:36:02	1	3	Astoria	28	2	Coffee	Gourmet brewed coffee	Columbian Medium Roast Sm	2	1	Jan	3	Wed	12
1862	2023-01-04	12:42:56	2	8	Hell's Kitchen	29	2.5	Coffee	Gourmet brewed coffee	Columbian Medium Roast Rg	5	1	Jan	3	Wed	12
1863	2023-01-04	12:44:08	2	5	Lower Manhattan	30	3	Coffee	Gourmet brewed coffee	Columbian Medium Roast Lg	6	1	Jan	3	Wed	12
1864	2023-01-04	12:45:57	2	5	Lower Manhattan	34	2.45	Coffee	Premium brewed coffee	Jamaican Coffee River Sm	4.9	1	Jan	3	Wed	12
1865	2023-01-04	12:49:10	1	8	Hell's Kitchen	32	3	Coffee	Gourmet brewed coffee	Ethiopia Rg	3	1	Jan	3	Wed	12
1866	2023-01-04	12:50:19	2	5	Lower Manhattan	34	2.45	Coffee	Premium brewed coffee	Jamaican Coffee River Sm	4.9	1	Jan	3	Wed	12
1867	2023-01-04	12:50:56	1	8	Hell's Kitchen	24	3	Coffee	Drip coffee	Our Old Time Diner Blend Lg	3	1	Jan	3	Wed	12
1868	2023-01-04	12:51:54	2	3	Astoria	29	2.5	Coffee	Gourmet brewed coffee	Columbian Medium Roast Rg	5	1	Jan	3	Wed	12
1869	2023-01-04	12:54:13	1	8	Hell's Kitchen	47	3	Tea	Brewed Green tea	Serenity Green Tea Lg	3	1	Jan	3	Wed	12
1870	2023-01-04	12:54:13	1	8	Hell's Kitchen	70	3.25	Bakery	Scone	Cranberry Scone	3.25	1	Jan	3	Wed	12
1871	2023-01-04	12:54:41	1	8	Hell's Kitchen	26	3	Coffee	Organic brewed coffee	Brazilian Rg	3	1	Jan	3	Wed	12
1872	2023-01-04	12:54:41	1	8	Hell's Kitchen	78	4.5	Bakery	Scone	Scottish Cream Scone	4.5	1	Jan	3	Wed	12
1873	2023-01-04	12:57:48	2	3	Astoria	30	3	Coffee	Gourmet brewed coffee	Columbian Medium Roast Lg	6	1	Jan	3	Wed	12
1874	2023-01-04	12:57:48	1	3	Astoria	71	3.75	Bakery	Pastry	Chocolate Croissant	3.75	1	Jan	3	Wed	12
1875	2023-01-04	12:58:36	1	3	Astoria	29	2.5	Coffee	Gourmet brewed coffee	Columbian Medium Roast Rg	2.5	1	Jan	3	Wed	12
1876	2023-01-04	12:59:15	1	3	Astoria	39	4.25	Coffee	Barista Espresso	Latte Rg	4.25	1	Jan	3	Wed	12
1877	2023-01-04	12:59:15	1	3	Astoria	69	3.25	Bakery	Biscotti	Hazelnut Biscotti	3.25	1	Jan	3	Wed	12
1878	2023-01-04	12:59:29	1	3	Astoria	38	3.75	Coffee	Barista Espresso	Latte	3.75	1	Jan	3	Wed	12
1879	2023-01-04	13:00:20	1	5	Lower Manhattan	53	3	Tea	Brewed Chai tea	Traditional Blend Chai Lg	3	1	Jan	3	Wed	13
1880	2023-01-04	13:03:55	1	8	Hell's Kitchen	59	4.5	Drinking Chocolate	Hot chocolate	Dark chocolate Lg	4.5	1	Jan	3	Wed	13
1881	2023-01-04	13:07:28	2	8	Hell's Kitchen	25	2.2	Coffee	Organic brewed coffee	Brazilian Sm	4.4	1	Jan	3	Wed	13
1882	2023-01-04	13:08:33	1	8	Hell's Kitchen	38	3.75	Coffee	Barista Espresso	Latte	3.75	1	Jan	3	Wed	13
1883	2023-01-04	13:09:08	2	3	Astoria	60	3.75	Drinking Chocolate	Hot chocolate	Sustainably Grown Organic Rg	7.5	1	Jan	3	Wed	13
1884	2023-01-04	13:12:37	1	3	Astoria	45	3	Tea	Brewed herbal tea	Peppermint Lg	3	1	Jan	3	Wed	13
1885	2023-01-04	13:13:40	1	3	Astoria	58	3.5	Drinking Chocolate	Hot chocolate	Dark chocolate Rg	3.5	1	Jan	3	Wed	13
1886	2023-01-04	13:14:55	1	3	Astoria	39	4.25	Coffee	Barista Espresso	Latte Rg	4.25	1	Jan	3	Wed	13
1887	2023-01-04	13:15:30	2	5	Lower Manhattan	23	2.5	Coffee	Drip coffee	Our Old Time Diner Blend Rg	5	1	Jan	3	Wed	13
1888	2023-01-04	13:15:45	1	3	Astoria	50	2.5	Tea	Brewed Black tea	Earl Grey Rg	2.5	1	Jan	3	Wed	13
1889	2023-01-04	13:17:22	1	3	Astoria	31	2.2	Coffee	Gourmet brewed coffee	Ethiopia Sm	2.2	1	Jan	3	Wed	13
1890	2023-01-04	13:17:25	2	3	Astoria	34	2.45	Coffee	Premium brewed coffee	Jamaican Coffee River Sm	4.9	1	Jan	3	Wed	13
1891	2023-01-04	13:17:56	2	3	Astoria	48	2.5	Tea	Brewed Black tea	English Breakfast Rg	5	1	Jan	3	Wed	13
1892	2023-01-04	13:19:45	2	5	Lower Manhattan	57	3.1	Tea	Brewed Chai tea	Spicy Eye Opener Chai Lg	6.2	1	Jan	3	Wed	13
1893	2023-01-04	13:19:45	1	5	Lower Manhattan	73	3.75	Bakery	Pastry	Almond Croissant	3.75	1	Jan	3	Wed	13
1894	2023-01-04	13:20:51	2	3	Astoria	23	2.5	Coffee	Drip coffee	Our Old Time Diner Blend Rg	5	1	Jan	3	Wed	13
1895	2023-01-04	13:26:45	2	3	Astoria	54	2.5	Tea	Brewed Chai tea	Morning Sunrise Chai Rg	5	1	Jan	3	Wed	13
1896	2023-01-04	13:27:17	1	8	Hell's Kitchen	34	2.45	Coffee	Premium brewed coffee	Jamaican Coffee River Sm	2.45	1	Jan	3	Wed	13
1897	2023-01-04	13:28:24	1	5	Lower Manhattan	45	3	Tea	Brewed herbal tea	Peppermint Lg	3	1	Jan	3	Wed	13
1898	2023-01-04	13:30:02	2	3	Astoria	24	3	Coffee	Drip coffee	Our Old Time Diner Blend Lg	6	1	Jan	3	Wed	13
1899	2023-01-04	13:31:23	1	3	Astoria	38	3.75	Coffee	Barista Espresso	Latte	3.75	1	Jan	3	Wed	13
1900	2023-01-04	13:32:03	1	3	Astoria	57	3.1	Tea	Brewed Chai tea	Spicy Eye Opener Chai Lg	3.1	1	Jan	3	Wed	13
1901	2023-01-04	13:39:22	1	3	Astoria	60	3.75	Drinking Chocolate	Hot chocolate	Sustainably Grown Organic Rg	3.75	1	Jan	3	Wed	13
1902	2023-01-04	13:41:31	2	8	Hell's Kitchen	35	3.1	Coffee	Premium brewed coffee	Jamaican Coffee River Rg	6.2	1	Jan	3	Wed	13
1903	2023-01-04	13:42:03	2	8	Hell's Kitchen	56	2.55	Tea	Brewed Chai tea	Spicy Eye Opener Chai Rg	5.1	1	Jan	3	Wed	13
1904	2023-01-04	13:42:22	2	8	Hell's Kitchen	45	3	Tea	Brewed herbal tea	Peppermint Lg	6	1	Jan	3	Wed	13
1905	2023-01-04	13:44:07	2	8	Hell's Kitchen	42	2.5	Tea	Brewed herbal tea	Lemon Grass Rg	5	1	Jan	3	Wed	13
1906	2023-01-04	13:44:07	1	8	Hell's Kitchen	76	3.5	Bakery	Biscotti	Chocolate Chip Biscotti	3.5	1	Jan	3	Wed	13
1907	2023-01-04	13:44:15	2	5	Lower Manhattan	31	2.2	Coffee	Gourmet brewed coffee	Ethiopia Sm	4.4	1	Jan	3	Wed	13
1908	2023-01-04	13:48:50	2	3	Astoria	53	3	Tea	Brewed Chai tea	Traditional Blend Chai Lg	6	1	Jan	3	Wed	13
1909	2023-01-04	13:49:07	2	5	Lower Manhattan	57	3.1	Tea	Brewed Chai tea	Spicy Eye Opener Chai Lg	6.2	1	Jan	3	Wed	13
1910	2023-01-04	13:49:07	1	5	Lower Manhattan	76	3.5	Bakery	Biscotti	Chocolate Chip Biscotti	3.5	1	Jan	3	Wed	13
1911	2023-01-04	13:50:04	2	3	Astoria	43	3	Tea	Brewed herbal tea	Lemon Grass Lg	6	1	Jan	3	Wed	13
1912	2023-01-04	13:51:18	1	3	Astoria	44	2.5	Tea	Brewed herbal tea	Peppermint Rg	2.5	1	Jan	3	Wed	13
1913	2023-01-04	13:51:44	2	3	Astoria	28	2	Coffee	Gourmet brewed coffee	Columbian Medium Roast Sm	4	1	Jan	3	Wed	13
1914	2023-01-04	13:51:59	1	8	Hell's Kitchen	33	3.5	Coffee	Gourmet brewed coffee	Ethiopia Lg	3.5	1	Jan	3	Wed	13
1915	2023-01-04	13:56:40	2	5	Lower Manhattan	54	2.5	Tea	Brewed Chai tea	Morning Sunrise Chai Rg	5	1	Jan	3	Wed	13
1916	2023-01-04	13:57:11	1	3	Astoria	22	2	Coffee	Drip coffee	Our Old Time Diner Blend Sm	2	1	Jan	3	Wed	13
1917	2023-01-04	13:57:11	1	3	Astoria	73	3.75	Bakery	Pastry	Almond Croissant	3.75	1	Jan	3	Wed	13
1918	2023-01-04	13:57:40	1	3	Astoria	45	3	Tea	Brewed herbal tea	Peppermint Lg	3	1	Jan	3	Wed	13
1919	2023-01-04	13:58:49	2	3	Astoria	45	3	Tea	Brewed herbal tea	Peppermint Lg	6	1	Jan	3	Wed	13
1920	2023-01-04	13:58:53	2	3	Astoria	41	4.25	Coffee	Barista Espresso	Cappuccino Lg	8.5	1	Jan	3	Wed	13
1921	2023-01-04	13:59:57	1	3	Astoria	53	3	Tea	Brewed Chai tea	Traditional Blend Chai Lg	3	1	Jan	3	Wed	13
1922	2023-01-04	14:02:55	1	8	Hell's Kitchen	57	3.1	Tea	Brewed Chai tea	Spicy Eye Opener Chai Lg	3.1	1	Jan	3	Wed	14
1923	2023-01-04	14:03:19	2	3	Astoria	46	2.5	Tea	Brewed Green tea	Serenity Green Tea Rg	5	1	Jan	3	Wed	14
1924	2023-01-04	14:03:56	1	5	Lower Manhattan	34	2.45	Coffee	Premium brewed coffee	Jamaican Coffee River Sm	2.45	1	Jan	3	Wed	14
1925	2023-01-04	14:04:09	2	5	Lower Manhattan	40	3.75	Coffee	Barista Espresso	Cappuccino	7.5	1	Jan	3	Wed	14
1926	2023-01-04	14:04:09	1	5	Lower Manhattan	77	3	Bakery	Scone	Oatmeal Scone	3	1	Jan	3	Wed	14
1927	2023-01-04	14:05:55	1	5	Lower Manhattan	41	4.25	Coffee	Barista Espresso	Cappuccino Lg	4.25	1	Jan	3	Wed	14
1928	2023-01-04	14:07:09	2	5	Lower Manhattan	42	2.5	Tea	Brewed herbal tea	Lemon Grass Rg	5	1	Jan	3	Wed	14
1929	2023-01-04	14:07:36	2	3	Astoria	49	3	Tea	Brewed Black tea	English Breakfast Lg	6	1	Jan	3	Wed	14
1930	2023-01-04	14:08:52	2	3	Astoria	27	3.5	Coffee	Organic brewed coffee	Brazilian Lg	7	1	Jan	3	Wed	14
1931	2023-01-04	14:12:24	2	3	Astoria	49	3	Tea	Brewed Black tea	English Breakfast Lg	6	1	Jan	3	Wed	14
1932	2023-01-04	14:13:50	1	8	Hell's Kitchen	39	4.25	Coffee	Barista Espresso	Latte Rg	4.25	1	Jan	3	Wed	14
1933	2023-01-04	14:15:31	2	5	Lower Manhattan	45	3	Tea	Brewed herbal tea	Peppermint Lg	6	1	Jan	3	Wed	14
1934	2023-01-04	14:15:47	2	8	Hell's Kitchen	44	2.5	Tea	Brewed herbal tea	Peppermint Rg	5	1	Jan	3	Wed	14
1935	2023-01-04	14:16:49	2	5	Lower Manhattan	37	3	Coffee	Barista Espresso	Espresso shot	6	1	Jan	3	Wed	14
1936	2023-01-04	14:17:15	2	8	Hell's Kitchen	50	2.5	Tea	Brewed Black tea	Earl Grey Rg	5	1	Jan	3	Wed	14
1937	2023-01-04	14:17:50	2	3	Astoria	30	3	Coffee	Gourmet brewed coffee	Columbian Medium Roast Lg	6	1	Jan	3	Wed	14
1938	2023-01-04	14:19:06	2	5	Lower Manhattan	59	4.5	Drinking Chocolate	Hot chocolate	Dark chocolate Lg	9	1	Jan	3	Wed	14
1939	2023-01-04	14:19:06	1	5	Lower Manhattan	71	3.75	Bakery	Pastry	Chocolate Croissant	3.75	1	Jan	3	Wed	14
1940	2023-01-04	14:19:28	1	5	Lower Manhattan	45	3	Tea	Brewed herbal tea	Peppermint Lg	3	1	Jan	3	Wed	14
1941	2023-01-04	14:20:56	1	5	Lower Manhattan	34	2.45	Coffee	Premium brewed coffee	Jamaican Coffee River Sm	2.45	1	Jan	3	Wed	14
1942	2023-01-04	14:20:56	1	5	Lower Manhattan	77	3	Bakery	Scone	Oatmeal Scone	3	1	Jan	3	Wed	14
1943	2023-01-04	14:21:09	1	3	Astoria	43	3	Tea	Brewed herbal tea	Lemon Grass Lg	3	1	Jan	3	Wed	14
1944	2023-01-04	14:21:46	2	3	Astoria	53	3	Tea	Brewed Chai tea	Traditional Blend Chai Lg	6	1	Jan	3	Wed	14
1945	2023-01-04	14:24:03	2	8	Hell's Kitchen	30	3	Coffee	Gourmet brewed coffee	Columbian Medium Roast Lg	6	1	Jan	3	Wed	14
1946	2023-01-04	14:26:56	2	8	Hell's Kitchen	39	4.25	Coffee	Barista Espresso	Latte Rg	8.5	1	Jan	3	Wed	14
1947	2023-01-04	14:28:28	2	5	Lower Manhattan	36	3.75	Coffee	Premium brewed coffee	Jamaican Coffee River Lg	7.5	1	Jan	3	Wed	14
1948	2023-01-04	14:28:28	1	5	Lower Manhattan	72	3.25	Bakery	Scone	Ginger Scone	3.25	1	Jan	3	Wed	14
1949	2023-01-04	14:31:03	2	8	Hell's Kitchen	46	2.5	Tea	Brewed Green tea	Serenity Green Tea Rg	5	1	Jan	3	Wed	14
1950	2023-01-04	14:32:08	1	8	Hell's Kitchen	49	3	Tea	Brewed Black tea	English Breakfast Lg	3	1	Jan	3	Wed	14
1951	2023-01-04	14:33:34	2	5	Lower Manhattan	27	3.5	Coffee	Organic brewed coffee	Brazilian Lg	7	1	Jan	3	Wed	14
1952	2023-01-04	14:36:27	1	3	Astoria	23	2.5	Coffee	Drip coffee	Our Old Time Diner Blend Rg	2.5	1	Jan	3	Wed	14
1953	2023-01-04	14:37:07	1	5	Lower Manhattan	34	2.45	Coffee	Premium brewed coffee	Jamaican Coffee River Sm	2.45	1	Jan	3	Wed	14
1954	2023-01-04	14:38:03	1	8	Hell's Kitchen	50	2.5	Tea	Brewed Black tea	Earl Grey Rg	2.5	1	Jan	3	Wed	14
1955	2023-01-04	14:38:16	2	5	Lower Manhattan	60	3.75	Drinking Chocolate	Hot chocolate	Sustainably Grown Organic Rg	7.5	1	Jan	3	Wed	14
1956	2023-01-04	14:39:12	2	3	Astoria	27	3.5	Coffee	Organic brewed coffee	Brazilian Lg	7	1	Jan	3	Wed	14
1957	2023-01-04	14:41:42	1	3	Astoria	29	2.5	Coffee	Gourmet brewed coffee	Columbian Medium Roast Rg	2.5	1	Jan	3	Wed	14
1958	2023-01-04	14:42:37	1	5	Lower Manhattan	27	3.5	Coffee	Organic brewed coffee	Brazilian Lg	3.5	1	Jan	3	Wed	14
1959	2023-01-04	14:42:44	2	5	Lower Manhattan	49	3	Tea	Brewed Black tea	English Breakfast Lg	6	1	Jan	3	Wed	14
1960	2023-01-04	14:42:55	2	8	Hell's Kitchen	87	3	Coffee	Barista Espresso	Ouro Brasileiro shot	6	1	Jan	3	Wed	14
1961	2023-01-04	14:43:05	2	8	Hell's Kitchen	26	3	Coffee	Organic brewed coffee	Brazilian Rg	6	1	Jan	3	Wed	14
1962	2023-01-04	14:43:52	1	5	Lower Manhattan	28	2	Coffee	Gourmet brewed coffee	Columbian Medium Roast Sm	2	1	Jan	3	Wed	14
1963	2023-01-04	14:44:00	2	8	Hell's Kitchen	43	3	Tea	Brewed herbal tea	Lemon Grass Lg	6	1	Jan	3	Wed	14
1964	2023-01-04	14:45:13	1	3	Astoria	60	3.75	Drinking Chocolate	Hot chocolate	Sustainably Grown Organic Rg	3.75	1	Jan	3	Wed	14
1965	2023-01-04	14:45:36	2	3	Astoria	45	3	Tea	Brewed herbal tea	Peppermint Lg	6	1	Jan	3	Wed	14
1966	2023-01-04	14:46:24	2	8	Hell's Kitchen	37	3	Coffee	Barista Espresso	Espresso shot	6	1	Jan	3	Wed	14
1967	2023-01-04	14:46:46	1	3	Astoria	29	2.5	Coffee	Gourmet brewed coffee	Columbian Medium Roast Rg	2.5	1	Jan	3	Wed	14
1968	2023-01-04	14:47:54	1	8	Hell's Kitchen	22	2	Coffee	Drip coffee	Our Old Time Diner Blend Sm	2	1	Jan	3	Wed	14
1969	2023-01-04	14:48:08	1	3	Astoria	36	3.75	Coffee	Premium brewed coffee	Jamaican Coffee River Lg	3.75	1	Jan	3	Wed	14
1970	2023-01-04	14:48:49	2	8	Hell's Kitchen	60	3.75	Drinking Chocolate	Hot chocolate	Sustainably Grown Organic Rg	7.5	1	Jan	3	Wed	14
1971	2023-01-04	14:49:43	1	3	Astoria	54	2.5	Tea	Brewed Chai tea	Morning Sunrise Chai Rg	2.5	1	Jan	3	Wed	14
1972	2023-01-04	14:52:17	2	8	Hell's Kitchen	40	3.75	Coffee	Barista Espresso	Cappuccino	7.5	1	Jan	3	Wed	14
1973	2023-01-04	14:53:17	2	5	Lower Manhattan	33	3.5	Coffee	Gourmet brewed coffee	Ethiopia Lg	7	1	Jan	3	Wed	14
1974	2023-01-04	14:53:18	2	3	Astoria	59	4.5	Drinking Chocolate	Hot chocolate	Dark chocolate Lg	9	1	Jan	3	Wed	14
1975	2023-01-04	14:53:18	1	3	Astoria	76	3.5	Bakery	Biscotti	Chocolate Chip Biscotti	3.5	1	Jan	3	Wed	14
1976	2023-01-04	14:53:58	1	8	Hell's Kitchen	22	2	Coffee	Drip coffee	Our Old Time Diner Blend Sm	2	1	Jan	3	Wed	14
1977	2023-01-04	14:55:28	2	8	Hell's Kitchen	56	2.55	Tea	Brewed Chai tea	Spicy Eye Opener Chai Rg	5.1	1	Jan	3	Wed	14
1978	2023-01-04	14:55:44	1	5	Lower Manhattan	30	3	Coffee	Gourmet brewed coffee	Columbian Medium Roast Lg	3	1	Jan	3	Wed	14
1979	2023-01-04	14:58:07	1	3	Astoria	47	3	Tea	Brewed Green tea	Serenity Green Tea Lg	3	1	Jan	3	Wed	14
1980	2023-01-04	14:58:07	1	3	Astoria	79	3.75	Bakery	Scone	Jumbo Savory Scone	3.75	1	Jan	3	Wed	14
1981	2023-01-04	14:59:16	1	3	Astoria	48	2.5	Tea	Brewed Black tea	English Breakfast Rg	2.5	1	Jan	3	Wed	14
1982	2023-01-04	15:00:14	2	3	Astoria	36	3.75	Coffee	Premium brewed coffee	Jamaican Coffee River Lg	7.5	1	Jan	3	Wed	15
1983	2023-01-04	15:00:14	1	3	Astoria	76	3.5	Bakery	Biscotti	Chocolate Chip Biscotti	3.5	1	Jan	3	Wed	15
1984	2023-01-04	15:00:47	1	5	Lower Manhattan	57	3.1	Tea	Brewed Chai tea	Spicy Eye Opener Chai Lg	3.1	1	Jan	3	Wed	15
1985	2023-01-04	15:02:50	2	3	Astoria	42	2.5	Tea	Brewed herbal tea	Lemon Grass Rg	5	1	Jan	3	Wed	15
1986	2023-01-04	15:02:50	1	3	Astoria	70	3.25	Bakery	Scone	Cranberry Scone	3.25	1	Jan	3	Wed	15
1987	2023-01-04	15:03:33	1	5	Lower Manhattan	61	4.75	Drinking Chocolate	Hot chocolate	Sustainably Grown Organic Lg	4.75	1	Jan	3	Wed	15
1988	2023-01-04	15:03:33	1	5	Lower Manhattan	74	3.5	Bakery	Biscotti	Ginger Biscotti	3.5	1	Jan	3	Wed	15
1989	2023-01-04	15:03:50	2	8	Hell's Kitchen	37	3	Coffee	Barista Espresso	Espresso shot	6	1	Jan	3	Wed	15
1990	2023-01-04	15:05:08	1	3	Astoria	55	4	Tea	Brewed Chai tea	Morning Sunrise Chai Lg	4	1	Jan	3	Wed	15
1991	2023-01-04	15:05:41	2	3	Astoria	35	3.1	Coffee	Premium brewed coffee	Jamaican Coffee River Rg	6.2	1	Jan	3	Wed	15
1992	2023-01-04	15:06:15	1	3	Astoria	53	3	Tea	Brewed Chai tea	Traditional Blend Chai Lg	3	1	Jan	3	Wed	15
1993	2023-01-04	15:08:10	2	3	Astoria	25	2.2	Coffee	Organic brewed coffee	Brazilian Sm	4.4	1	Jan	3	Wed	15
1994	2023-01-04	15:08:17	1	3	Astoria	58	3.5	Drinking Chocolate	Hot chocolate	Dark chocolate Rg	3.5	1	Jan	3	Wed	15
1995	2023-01-04	15:14:28	2	3	Astoria	56	2.55	Tea	Brewed Chai tea	Spicy Eye Opener Chai Rg	5.1	1	Jan	3	Wed	15
1996	2023-01-04	15:16:24	2	8	Hell's Kitchen	50	2.5	Tea	Brewed Black tea	Earl Grey Rg	5	1	Jan	3	Wed	15
1997	2023-01-04	15:16:29	2	8	Hell's Kitchen	41	4.25	Coffee	Barista Espresso	Cappuccino Lg	8.5	1	Jan	3	Wed	15
1998	2023-01-04	15:17:02	1	8	Hell's Kitchen	60	3.75	Drinking Chocolate	Hot chocolate	Sustainably Grown Organic Rg	3.75	1	Jan	3	Wed	15
1999	2023-01-04	15:17:31	2	5	Lower Manhattan	87	3	Coffee	Barista Espresso	Ouro Brasileiro shot	6	1	Jan	3	Wed	15
[truncated: 147,117 more rows]
