# Supplementary material for: Uncovering Revenue Trends: Predictive Analytics with Linear Regression and Time Series in Coffee Shop Transactions
Source: Research Square preprint supplement (doi:10.21203/rs.3.rs-6306879/v1), 2025-03-27
Supplement: Supplementary file 1 [file 9f4ca07acd5cc12fef5d6ced.pdf]

# R Notebook

```
###                               #####                               ###
#       Linear Regression Analysis on Coffee Transactions Dataset      #
#               HAMAD A. ALMAZROUEI - 201912368                        #
###                               #####                               ###

# Set a seed for reproducibility
set.seed(999)

# Load necessary libraries
library(ggplot2) # For data visualization
library(dplyr)   # For data manipulation and transformation

##
## Attaching package: 'dplyr'

## The following objects are masked from 'package:stats':
##
##   filter, lag

## The following objects are masked from 'package:base':
##
##   intersect, setdiff, setequal, union

library(prophet) # For time series forecasting

## Loading required package: Rcpp

## Warning: package 'Rcpp' was built under R version 4.3.3

## Loading required package: rlang

## Warning: package 'rlang' was built under R version 4.3.3

library(caTools) # For data splitting and utility functions

## Warning: package 'caTools' was built under R version 4.3.3

# The above libraries are now loaded and ready for use:
# - ggplot2: Enables creation of elegant data visualizations.
# - dplyr: Provides a grammar for data manipulation (filter, mutate, group_by,
#   etc.).
# - prophet: A powerful tool for forecasting time series data.
```

```
# - caTools: Useful for splitting data into training and testing sets, among
# other utilities.
```

```
# ----- Step 1: Load and Prepare Data -----
```

```
# Read the dataset
```

```
coffee_data <- read.csv("/Users/hamad/Desktop/ZU/Fall 2024/Data Science - C/Assignment 3/Files/Coffee T
```

```
# ----- Step 1.1: Data Structure View -----
```

```
# View the structure of the data
```

```
str(coffee_data)
```

```
## 'data.frame': 149116 obs. of 17 variables:
## $ transaction_id : int 1 2 3 4 5 6 7 8 9 10 ...
## $ transaction_date: chr "01/01/2023" "01/01/2023" "01/01/2023" "01/01/2023" ...
## $ transaction_time: chr "7:06:11" "7:08:56" "7:14:04" "7:20:24" ...
## $ transaction_qty : int 2 2 2 1 2 1 1 2 1 2 ...
## $ store_id : int 5 5 5 5 5 5 5 5 5 5 ...
## $ store_location : chr "Lower Manhattan" "Lower Manhattan" "Lower Manhattan" "Lower Manhattan" ..
## $ product_id : int 32 57 59 22 57 77 22 28 39 58 ...
## $ unit_price : num 3 3.1 4.5 2 3.1 3 2 2 4.25 3.5 ...
## $ product_category: chr "Coffee" "Tea" "Drinking Chocolate" "Coffee" ...
## $ product_type : chr "Gourmet brewed coffee" "Brewed Chai tea" "Hot chocolate" "Drip coffee" ..
## $ product_detail : chr "Ethiopia Rg" "Spicy Eye Opener Chai Lg" "Dark chocolate Lg" "Our Old Time
## $ Revenue : chr "$6.00" "$6.20" "$9.00" "$2.00" ...
## $ Month : int 1 1 1 1 1 1 1 1 1 1 ...
## $ Month.1 : chr "Jan" "Jan" "Jan" "Jan" ...
## $ Weekday : int 7 7 7 7 7 7 7 7 7 7 ...
## $ Weekday.1 : chr "Sun" "Sun" "Sun" "Sun" ...
## $ Hour : int 7 7 7 7 7 7 7 7 7 7 ...
```

```
# View the summary statistics of the data
```

```
summary(coffee_data)
```

```
## transaction_id transaction_date transaction_time transaction_qty
## Min. : 1 Length:149116 Length:149116 Min. :1.000
## 1st Qu.: 37336 Class :character Class :character 1st Qu.:1.000
## Median : 74728 Mode :character Mode :character Median :1.000
## Mean : 74737 Mean :1.438
## 3rd Qu.:112094 3rd Qu.:2.000
## Max. :149456 Max. :8.000
## store_id store_location product_id unit_price
## Min. :3.000 Length:149116 Min. : 1.00 Min. : 0.800
## 1st Qu.:3.000 Class :character 1st Qu.:33.00 1st Qu.: 2.500
## Median :5.000 Mode :character Median :47.00 Median : 3.000
## Mean :5.342 Mean :47.92 Mean : 3.382
## 3rd Qu.:8.000 3rd Qu.:60.00 3rd Qu.: 3.750
## Max. :8.000 Max. :87.00 Max. :45.000
## product_category product_type product_detail Revenue
## Length:149116 Length:149116 Length:149116 Length:149116
## Class :character Class :character Class :character Class :character
## Mode :character Mode :character Mode :character Mode :character
```

```
##
##
##
##      Month      Month.1      Weekday      Weekday.1
##  Min.   :1.000   Length:149116   Min.     :1.000   Length:149116
##  1st Qu.:3.000   Class :character   1st Qu.:2.000   Class :character
##  Median :4.000   Mode  :character   Median :4.000   Mode  :character
##  Mean   :3.989                Mean    :3.982
##  3rd Qu.:5.000                3rd Qu.:6.000
##  Max.   :6.000                Max.     :7.000
##      Hour
##  Min.     : 6.00
##  1st Qu.: 9.00
##  Median :11.00
##  Mean    :11.74
##  3rd Qu.:15.00
##  Max.    :20.00
```

### *# Analysis of the Coffee Shop Transactions Dataset*

#### *# Data Overview*

*# - The dataset contains 149,116 observations with 17 variables, providing transaction-level details of*  
*# - Key variables include transaction\_id, store\_location, product\_category, transaction\_qty, and Revenue*

#### *# Summary Statistics*

##### *# Transaction ID*

*# - Range: 1 to 149,456, representing unique identifiers for each transaction.*

##### *# Transaction Date and Time*

*# - transaction\_date: Character format, indicating the date of each*  
*# transaction.*  
*# - transaction\_time: Character format, indicating the time of each*  
*# transaction.*

##### *# Transaction Quantity*

*# - Range: 1 to 8, with a mean of 1.438.*  
*# - Most transactions involve 1 or 2 items (1st Qu.:1, Median:1, 3rd Qu.:2).*

##### *# Store Information*

*# - store\_id: Values range from 3 to 8, indicating multiple store locations.*  
*# - store\_location: Descriptive location names, such as "Lower Manhattan."*

##### *# Product Details*

*# - product\_id: Ranges from 1 to 87, representing unique product identifiers.*  
*# - product\_category: Contains categories like "Coffee," "Tea," etc.*  
*# - product\_type: Provides additional granularity, such as "Gourmet brewed*  
*# coffee" or "Hot chocolate."*  
*# - unit\_price: Prices range from \$0.80 to \$45.00, with a mean price of \$3.382.*

##### *# Revenue*

*# - The Revenue column is in character format (e.g., "\$6.00"). It should be*  
*# converted to numeric for analysis.*

```

# Time Information
# - Month and Month.1: Represent months numerically (1-6) and textually
# ("Jan," "Feb").
# - Weekday and Weekday.1: Represent weekdays numerically (1-7) and
# textually ("Sun," "Mon").
# - Hour: Represents the hour of the transaction, ranging from 6 AM to
# 8 PM (Min.:6, Max.:20).

```

```

# Observations
# - The majority of transactions involve small quantities and moderately
# priced items.
# - Store and product-level granularity enables analysis by location and
# product preferences.
# - Time variables allow for temporal analysis, such as peak transaction
# hours or seasonal trends.

```

```

# ----- Step 1.2: Data Preparation Process -----

```

```

# Check for missing values in the dataset
sum(is.na(coffee_data))

```

```

## [1] 0

```

```

# Output: Total count of missing values in the entire dataset

```

```

colSums(is.na(coffee_data))

```

```

## transaction_id transaction_date transaction_time transaction_qty
##           0           0           0           0
##      store_id  store_location      product_id      unit_price
##           0           0           0           0
## product_category      product_type      product_detail      Revenue
##           0           0           0           0
##           Month      Month.1      Weekday      Weekday.1
##           0           0           0           0
##           Hour
##           0

```

```

# Output: Count of missing values for each column in the dataset

```

```

# Analysis of Missing Values in the Coffee Shop Dataset

```

```

# Key Observations

```

```

# - Total missing values: 0
# - No columns contain missing values, as confirmed by sum(is.na(coffee_data))
# and colSums(is.na(coffee_data)).

```

```

# Implications

```

```

# - The dataset is complete and does not require imputation for missing data.
# - Analysis can proceed without concerns about data loss or introducing biases

```

```

# due to handling missing values.

# Formatting 'transaction_date' column from character to Date format
coffee_data$transaction_date <- as.Date(coffee_data$transaction_date,
                                         format = "%d/%m/%Y")
# Transformation of transaction_date to Date Format

# Code Description
# - The transaction_date column is converted from a character format to a
# Date object using as.Date().
# - The format "%d/%m/%Y" specifies the day, month, and year structure of
# the input data.

# Validation
# - After this transformation, the transaction_date column can be used for
# time-series analysis and date-based aggregations.

# Formatting 'Revenue' column to numeric after removing "$" symbol
coffee_data$Revenue <- as.numeric(gsub("\\$", "", coffee_data$Revenue))
# Transformation of Revenue Column to Numeric Format

# Code Description
# - The gsub("\\$", "", coffee_data$Revenue) function removes the dollar sign
# ($) from the Revenue column.
# - The as.numeric() function converts the cleaned values to numeric format.

# Validation
# - The transformation ensures that Revenue is in numeric format and ready
# for mathematical operations and aggregations.
# - Check the structure of the column using str(coffee_data) or summary
# statistics using summary(coffee_data$Revenue) to confirm the transformation.

# Converting 'product_category' and 'store_location' columns to factors
coffee_data$product_category <- factor(coffee_data$product_category)
coffee_data$store_location <- factor(coffee_data$store_location)

# Conversion of Categorical Variables to Factor

# Code Description
# - The product_category and store_location columns are converted to
# factor type.
# - This transformation helps optimize storage and facilitates categorical
# analysis.

# Benefits
# - Improves memory efficiency for large datasets.
# - Enables advanced categorical analyses, such as group-wise aggregations
# and visualizations.

# Validation

```

```
# - Verify the changes using str(coffee_data) to confirm the columns are
# now factors.
# - Check the levels of each factor using levels(coffee_data$product_category)
# and levels(coffee_data$store_location).
```

```
# ----- Step 2: Exploratory Data Analysis -----
```

```
# Visualizing the relationship between revenue and transaction quantity
ggplot(coffee_data, aes(x = transaction_qty, y = Revenue)) +
  geom_point(aes(color = product_category)) +
  ggtitle("Revenue vs. Transaction Quantity by Product Category") +
  xlab("Transaction Quantity") +
  ylab("Revenue")
```

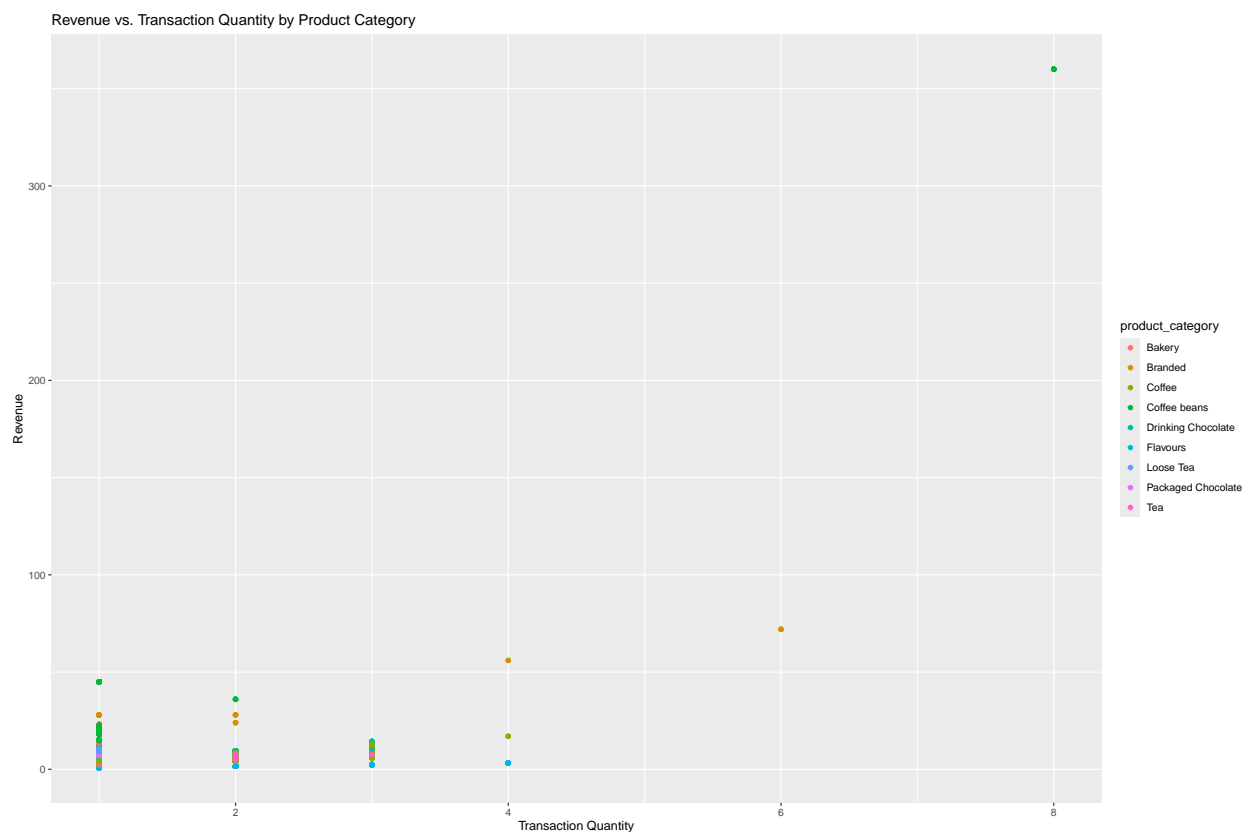

```
# Analysis of the Scatter Plot: Revenue vs. Transaction Quantity by Product Category
```

```
# Key Observations
```

```
# - The scatter plot shows the relationship between transaction_qty (x-axis)
# and Revenue (y-axis), colored by product_category.
# - The majority of transactions involve smaller quantities (1 or 2 items),
# but higher quantities (e.g., 6-8) are observed in specific categories.
# - Some categories, such as "Branded" and "Coffee beans," exhibit higher
# revenue per transaction, especially for larger quantities.
```

```
# Insights
```

```
# - High Revenue Categories: Categories like "Branded" and "Coffee beans"
# generate higher revenues, possibly due to higher unit prices or larger
# quantities purchased in single transactions.
# - Transaction Quantity Distribution: Most transactions involve low
# quantities, indicating customers typically purchase a small number of items
# at a time.
# - Category Spread: Categories like "Coffee," "Tea," and "Drinking
# Chocolate" have lower revenue per transaction but may have higher sales
# volume overall.
```

```
# Visualizing the relationship between revenue and store location
ggplot(coffee_data, aes(x = store_location, y = Revenue)) +
  geom_boxplot() +
  ggtitle("Revenue Distribution by Store Location") +
  xlab("Store Location") +
  ylab("Revenue")
```

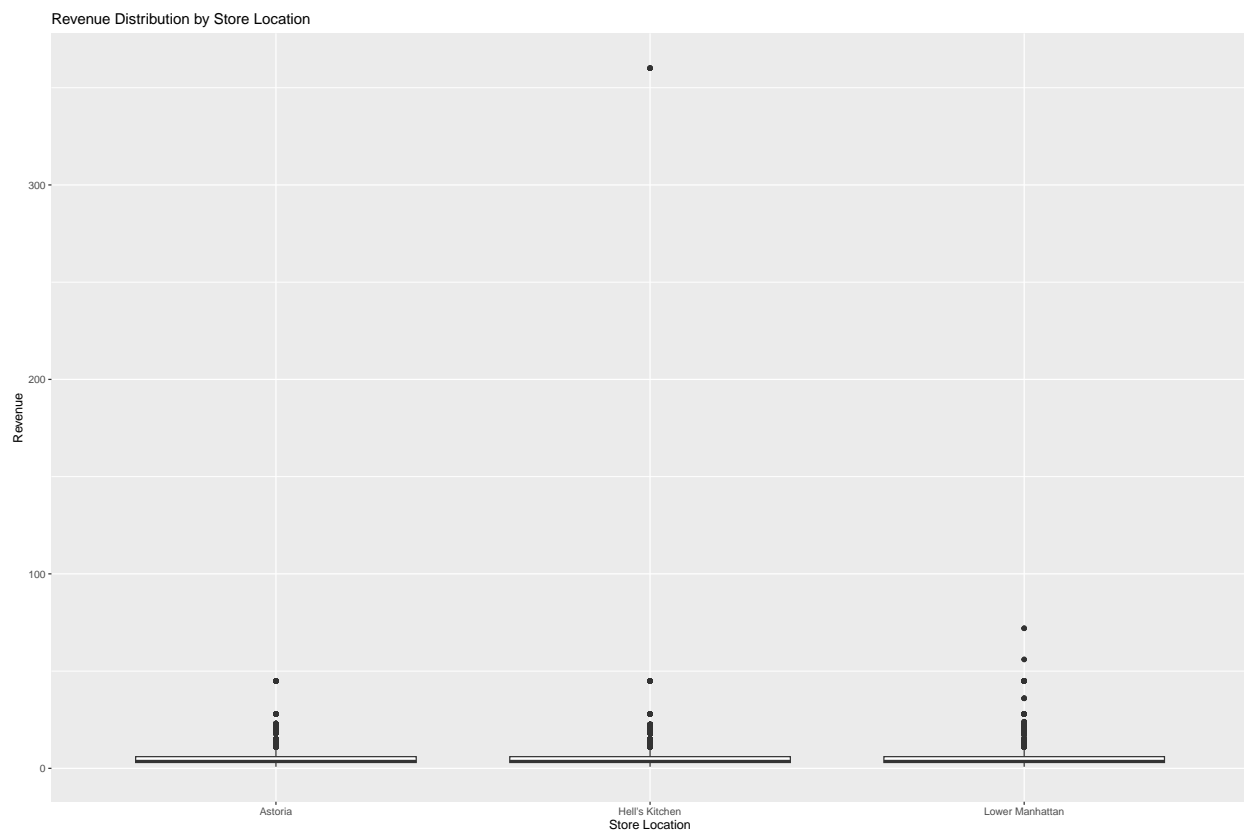

```
# Explanation:
# - geom_boxplot() creates a boxplot to display revenue distributions
# across locations.
# - Boxplots provide insights into the spread, central tendency, and
# outliers in revenue.
# - Useful for comparing store performance and identifying anomalies.

# Analysis of the Boxplot: Revenue Distribution by Store Location
```

```

# Key Observations
# - The boxplot illustrates the revenue distribution across three store
# locations: Astoria, Hell's Kitchen, and Lower Manhattan.
# - The median revenue for transactions is relatively consistent across all
# locations.
# - Outliers are visible in all three locations, particularly in Hell's
# Kitchen and Lower Manhattan, indicating occasional high-revenue transactions.

# Insights
# - Consistency Across Locations: The core revenue distribution
# (interquartile range) appears similar among the three locations, suggesting
# comparable customer spending behavior.
# - High-Revenue Transactions: Some outliers in Hell's Kitchen and Lower
# Manhattan suggest that these locations may occasionally serve high-value
# transactions.
# - Potential Store Performance: The lack of significant variation in
# median revenue suggests that store performance is more influenced by
# transaction volume than transaction value.

```

```

# ----- Step 3: Simple Linear Regression -----
# Predict Revenue based on Transaction Quantity
# Split data using caTools

# Splitting the dataset into training and testing sets
split <- sample.split(coffee_data$Revenue, SplitRatio = 0.7)

# Creating the training dataset (70% of the data)
train_data <- subset(coffee_data, split == TRUE)

# Creating the testing dataset (30% of the data)
test_data <- subset(coffee_data, split == FALSE)

# Explanation:
# - sample.split() is used to create a logical vector for splitting the
# dataset.
# - SplitRatio = 0.7 means 70% of the data goes into the training set.
# - subset() selects rows based on the logical vector generated by
# sample.split().
# - This ensures a random and balanced split for modeling and evaluation.
# Dataset Splitting Analysis: Training and Testing Sets

# Key Observations
# - The dataset was split into training (70%) and testing (30%) subsets using
# the sample.split function.
# - The splitting ensures that the dependent variable Revenue maintains a
# representative distribution in both subsets.

# Insights
# - Training Dataset: The training dataset contains 70% of the data,
# which is sufficient for model training while preserving enough diversity to
# capture the underlying patterns.
# - Testing Dataset: The testing dataset comprises 30% of the data, which
# is adequate for evaluating model performance and generalization.

```



```

# Train a simple linear regression model
lm_simple <- lm(Revenue ~ transaction_qty, data = train_data)

# Summarize the model
summary(lm_simple)

##
## Call:
## lm(formula = Revenue ~ transaction_qty, data = train_data)
##
## Residuals:
##      Min       1Q   Median       3Q      Max
## -8.58  -0.97  -0.24   0.28  337.13
##
## Coefficients:
##              Estimate Std. Error t value Pr(>|t|)
## (Intercept)    0.70021    0.03461   20.23  <2e-16 ***
## transaction_qty 2.77111    0.02251  123.09  <2e-16 ***
## ---
## Signif. codes:  0 '***' 0.001 '**' 0.01 '*' 0.05 '.' 0.1 ' ' 1
##
## Residual standard error: 3.949 on 104378 degrees of freedom
## Multiple R-squared:  0.1268, Adjusted R-squared:  0.1268
## F-statistic: 1.515e+04 on 1 and 104378 DF,  p-value: < 2.2e-16

# Explanation:
# - lm() fits a linear regression model predicting Revenue based on
# transaction_qty.
# - summary() provides a detailed summary of the model, including:
#   - Coefficients: Intercept and slope of the linear model.
#   - R-squared: Proportion of variance in Revenue explained by
# transaction_qty.
#   - p-value: Statistical significance of the relationship.
# - Analyze the output to evaluate the model's performance and significance
# of predictors.

# Linear Regression Model Summary Analysis: Revenue ~ Transaction Quantity

# Key Observations:
# - The linear regression model predicts Revenue based on transaction_qty.
# - The model's intercept is 0.70021, and the coefficient for transaction_qty
# is 2.77111.
# - Both the intercept and the transaction quantity coefficient are highly
# significant (p-value < 2e-16).

# Residual Analysis:
# - The residuals have a minimum of -8.58 and a maximum of 337.13, with the
# majority of residuals clustered close to zero.
# - This indicates that while the model captures the general trend, there are
# outliers with higher deviations.

# Model Fit:
# - Multiple R-squared: 0.1268

```

```

# - Indicates that approximately 12.68% of the variance in Revenue is
# explained by transaction_qty.
# - This suggests that the model captures only a small portion of the
# variability, indicating a weak fit.
# - Adjusted R-squared: 0.1268
# - Same as R-squared in this case, as the model only includes one predictor.

# Statistical Significance:
# - F-statistic: 1.515e+04 with a p-value < 2.2e-16
# - Strong evidence that the model as a whole is statistically significant.

# Practical Implications:
# - The positive coefficient for transaction_qty (2.77111) suggests that for
# every unit increase in transaction_qty, Revenue increases by
# approximately 2.77 units.
# - However, the low R-squared indicates that additional variables might be
# needed to better explain the variability in Revenue.

# Predict on the test set
# Predict revenue on the testing set using the trained model
test_data$predicted_revenue1 <- predict(lm_simple, newdata = test_data)

# Explanation:
# - predict() generates predictions for Revenue based on transaction_qty
# in the test_data.
# - The predictions are stored in a new column predicted_revenue1 within the
# test_data dataframe.
# - This column will be used to evaluate the model's performance by comparing
# predicted and actual values.

# Generate predictions for the test dataset using the trained linear model
# - The predict function is applied with lm_simple (the linear regression model)
# and test_data as the new dataset for which predictions are required.
# - A new column named predicted_revenue1 is added to the test_data dataframe
# to store the predicted revenue values for each observation.

# Evaluate model performance using test set
ggplot(test_data, aes(x = Revenue, y = predicted_revenue1)) +
  geom_point() +
  geom_abline(slope = 1, intercept = 0, col = "yellow") +
  ggtitle("Actual vs. Predicted Revenue (Test Data)") +
  xlab("Actual Revenue") +
  ylab("Predicted Revenue")

```

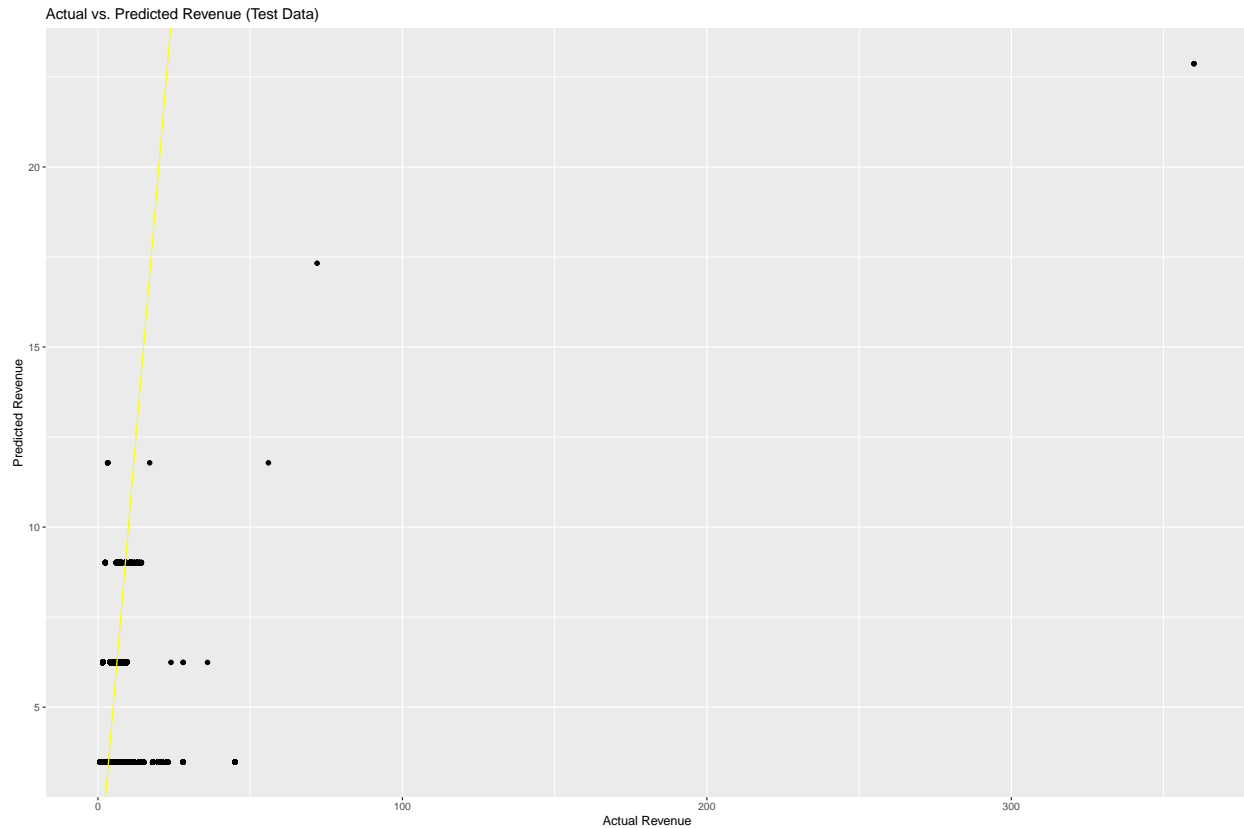

```
# Visualize the Actual vs. Predicted Revenue for the test dataset
# - The scatterplot compares the actual revenue values (x-axis) with the
# predicted revenue values (y-axis).
# - A diagonal line (geom_abline) is added to represent the ideal scenario
# where predicted values perfectly match actual values.
# - The line has a slope of 1 and intercept of 0 (identity line) to highlight
# any deviations.
# - This plot is useful for evaluating the performance of the model visually,
# with larger deviations indicating areas of poor prediction accuracy.
```

```
# ----- Step 4: Multiple Linear Regression -----
```

```
# Train the multiple linear regression model on the training set
lm_multiple <- lm(Revenue ~ transaction_qty + product_category +
  store_location, data = train_data)
```

```
# Summarize the model
summary(lm_multiple)
```

```
##
## Call:
## lm(formula = Revenue ~ transaction_qty + product_category + store_location,
##     data = train_data)
##
```

```
## Residuals:
##      Min       1Q   Median       3Q      Max
## -12.752  -0.582   0.018   0.550  312.510
##
## Coefficients:
##              Estimate Std. Error t value Pr(>|t|)
## (Intercept)      0.03449    0.03205   1.076   0.282
## transaction_qty      3.53399    0.01812 195.036 < 2e-16 ***
## product_categoryBranded 14.52939    0.13124 110.707 < 2e-16 ***
## product_categoryCoffee  -0.79607    0.02905 -27.404 < 2e-16 ***
## product_categoryCoffee beans 19.15172    0.08723 219.563 < 2e-16 ***
## product_categoryDrinking Chocolate 0.91525    0.04144  22.085 < 2e-16 ***
## product_categoryFlavours  -4.23930    0.04965 -85.377 < 2e-16 ***
## product_categoryLoose Tea    5.71429    0.10410  54.895 < 2e-16 ***
## product_categoryPackaged Chocolate 5.50433    0.16106  34.176 < 2e-16 ***
## product_categoryTea      -1.11805    0.03013 -37.103 < 2e-16 ***
## store_locationHell's Kitchen 0.03152    0.02217   1.422   0.155
## store_locationLower Manhattan -0.09043    0.02261  -3.999 6.35e-05 ***
## ---
## Signif. codes:  0 '***' 0.001 '**' 0.01 '*' 0.05 '.' 0.1 ' ' 1
##
## Residual standard error: 2.947 on 104368 degrees of freedom
## Multiple R-squared:  0.5138, Adjusted R-squared:  0.5138
## F-statistic: 1.003e+04 on 11 and 104368 DF, p-value: < 2.2e-16
```

```
# Summary of the multiple linear regression model:
# - The model predicts Revenue based on transaction_qty,
# product_category, and store_location.

# Key observations:
# 1. transaction_qty has a strong positive effect on Revenue (Estimate
# = 3.53399, p-value < 2e-16).
# Each additional item purchased increases revenue by approximately $3.53,
# holding other variables constant.
# 2. product_category coefficients indicate varying impacts:
# - Coffee beans category has the highest positive impact on revenue
# (Estimate = 19.15172).
# - Flavours negatively impacts revenue significantly
# (Estimate = -4.23930).
# - Branded products increase revenue considerably (Estimate = 14.52939).
# - Categories such as Drinking Chocolate, Loose Tea, and Packaged
# Chocolate also contribute positively.
# 3. store_location:
# - Lower Manhattan has a small negative impact on revenue compared to the
# baseline location (Estimate = -0.09043).
# - Hell's Kitchen does not show a statistically significant effect
# (p-value = 0.155).

# Model evaluation:
# - Multiple R-squared: 0.5138. The model explains approximately 51.38% of the
# variance in revenue, which is moderate.
# - Residual standard error: 2.947, indicating the average deviation of
# predicted revenue from actual revenue.
# - F-statistic: Very high (1.003e+04), with a p-value < 2.2e-16, indicating
```

```

# the overall model is highly significant.

# Interpretation:
# - The model effectively captures the relationship between transaction
# quantity, product categories, and revenue.
# - Product categories have a strong influence on revenue, with significant
# variability among categories.
# - Store location has a minimal impact, suggesting revenue is more dependent
# on product mix and quantity.

# Predict on the test set
test_data$predicted_revenue2 <- predict(lm_multiple, newdata = test_data)
# Comment on the prediction step:
# - The predict() function is used to generate predicted revenue values
# (predicted_revenue2)
# for the test dataset using the trained multiple linear regression model
# (lm_multiple).
# - This step incorporates the effects of all independent variables:
# transaction_qty,
# product_category, and store_location, as modeled in the training phase.

# Expected outcome:
# - The predicted values will reflect the combined contributions of the
# predictors
# to estimate the Revenue for each transaction in the test dataset.
# - These predictions will be evaluated against actual revenue values for
# model performance assessment.

# Evaluate model performance using predictions vs. actuals on the test set
ggplot(test_data, aes(x = Revenue, y = predicted_revenue2)) +
  geom_point() +
  geom_abline(slope = 1, intercept = 0, col = "red") +
  ggtitle("Actual vs. Predicted Revenue (Test Data)") +
  xlab("Actual Revenue") +
  ylab("Predicted Revenue")

```

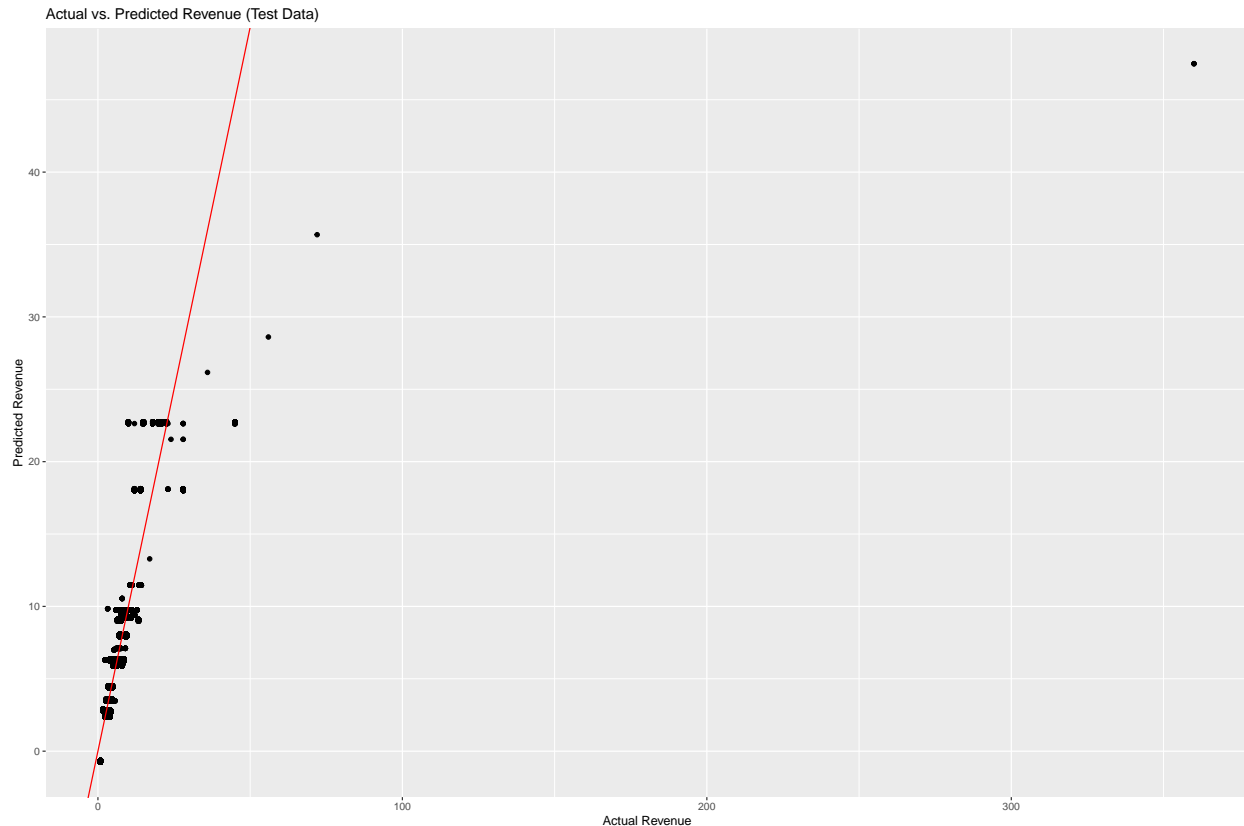

```
# Comment on the visualization:
# - This scatter plot visualizes the comparison between actual revenue (x-axis)
#   and predicted revenue (y-axis) from the multiple linear regression model.
# - The red diagonal line represents the ideal scenario where predicted revenue
#   perfectly matches the actual revenue, i.e., all points should lie on
#   this line.
```

```
# Observations:
# - The majority of predictions closely align with the actual revenue values,
#   especially for lower revenue ranges.
# - Some outliers or deviations can be observed, particularly for transactions
#   with higher actual revenue, suggesting potential limitations in model
#   accuracy
#   for extreme values or unmodeled factors influencing revenue.
```

```
# Purpose:
# - This plot helps assess the quality of the predictions and highlights areas
#   for potential model improvement, such as handling extreme values or
#   refining predictors.
```

```
# Visualize the regression fit on the training data
ggplot(train_data, aes(x = Revenue, y = predict(lm_multiple,
  newdata = train_data))) +
  geom_point(aes(color = product_category)) +
  geom_abline(slope = 1, intercept = 0, col = "blue") +
  ggtitle("Training Data: Actual vs. Predicted Revenue") +
  xlab("Actual Revenue") +
```

```
ylab("Predicted Revenue")
```

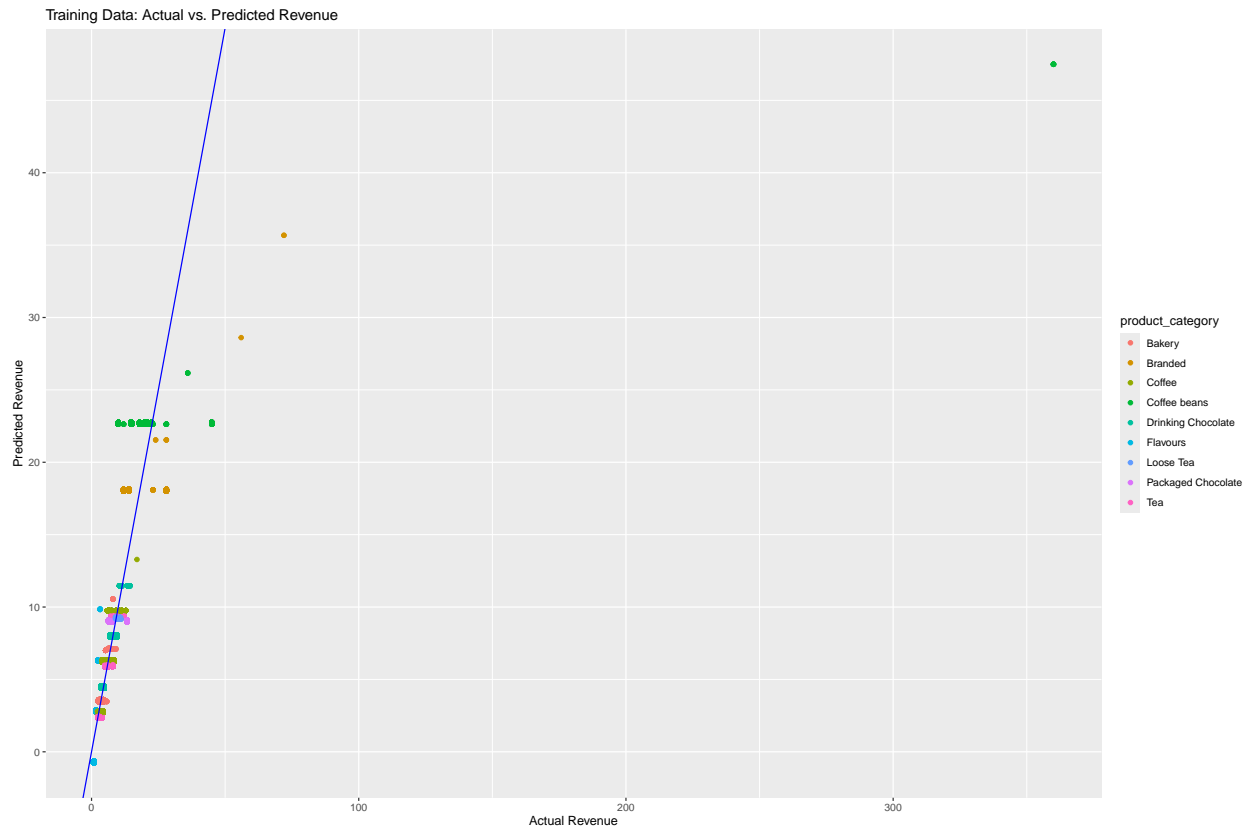

```
# Comment on the visualization:  
# - This scatter plot represents the relationship between actual revenue  
# (x-axis) and predicted revenue (y-axis) on the training dataset.  
# - Different product categories are distinguished by colors, adding clarity  
# on how predictions vary across categories.  
# - The blue diagonal line represents the ideal match, where predicted values  
# equal the actual revenue.
```

```
# Observations:  
# - Many data points align well with the diagonal, especially for smaller  
# revenue values.  
# - A few outliers and deviations are noticeable, particularly for higher  
# revenue values.  
# - Certain product categories, such as "Coffee beans" (green), show higher  
# predicted values  
# compared to other categories, indicating their significant contribution  
# to revenue.
```

```
# Purpose:  
# - This plot helps evaluate the model's performance on the training data,  
# indicating a good fit with some areas for improvement in handling extreme  
# values.
```

```
# ----- Step 5: Model Evaluation -----
```

```
# ----- Step 5.1: Calculate MAE, MSE, and RMSE for Both Models -----
```

```
# Calculate MAE, MSE, and RMSE for Simple Regression (Test Set)
```

```
mae_simple <- mean(abs(test_data$Revenue - test_data$predicted_revenue1))
```

```
mse_simple <- mean((test_data$Revenue - test_data$predicted_revenue1)^2)
```

```
rmse_simple <- sqrt(mse_simple)
```

```
cat("Simple Regression (Test Set) - MAE:", mae_simple,  
    "MSE:", mse_simple,  
    "RMSE:", rmse_simple, "\n")
```

```
## Simple Regression (Test Set) - MAE: 1.29322 MSE: 15.6108 RMSE: 3.951051
```

```
# Analysis of Simple Regression Error Metrics:
```

```
# - MAE (Mean Absolute Error): 1.29322
```

```
# Indicates the average magnitude of errors in the model's predictions.
```

```
# On average, the predicted revenue deviates by approximately $1.29 from  
# the actual revenue.
```

```
# - MSE (Mean Squared Error): 15.6108
```

```
# Reflects the average squared difference between predicted and actual  
# revenues.
```

```
# Larger errors are penalized more heavily due to squaring, emphasizing  
# significant deviations.
```

```
# - RMSE (Root Mean Squared Error): 3.951051
```

```
# Provides the error in the same units as the target variable (Revenue).
```

```
# A higher RMSE suggests that while the model captures general trends, it  
# struggles with larger variances.
```

```
# Observations:
```

```
# - The error metrics suggest reasonable accuracy for simpler relationships  
# like transaction_qty.
```

```
# - However, given the dataset's complexity (e.g., multiple categories and  
# locations), a simple linear regression may not fully capture all patterns,  
# evident from relatively high RMSE.
```

```
# Conclusion:
```

```
# - The simple regression model provides a baseline but could benefit from  
# additional predictors for improved accuracy.
```

```
# Calculate MAE, MSE, and RMSE for Multiple Regression (Test Set)
```

```
mae_multiple <- mean(abs(test_data$Revenue - test_data$predicted_revenue2))
```

```
mse_multiple <- mean((test_data$Revenue - test_data$predicted_revenue2)^2)
```

```
rmse_multiple <- sqrt(mse_multiple)
```

```
cat("Multiple Regression (Test Set) - MAE:", mae_multiple,  
    "MSE:", mse_multiple,
```



```
"RMSE:", rmse_multiple, "\n")
```

```
## Multiple Regression (Test Set) - MAE: 0.8288278 MSE: 8.685382 RMSE: 2.947097
```

```
# Analysis of Multiple Regression Error Metrics:
```

```
# - MAE (Mean Absolute Error): 0.8288278
```

```
# This indicates that, on average, the predicted revenue deviates by  
# approximately $0.83 from the actual revenue.
```

```
# This is a significant improvement compared to the simple regression model  
# (MAE = 1.29322).
```

```
# - MSE (Mean Squared Error): 8.685382
```

```
# The average squared difference between predicted and actual revenues is  
# reduced.
```

```
# This implies the multiple regression model captures the variability in  
# the data better than the simple regression model (MSE = 15.6108).
```

```
# - RMSE (Root Mean Squared Error): 2.947097
```

```
# The RMSE is lower, meaning the multiple regression model provides better  
# predictions with smaller deviations compared to the simple regression model  
# (RMSE = 3.951051).
```

```
# Observations:
```

```
# - The inclusion of additional predictors, such as product_category and  
# store_location, significantly improves model performance.
```

```
# - Lower MAE, MSE, and RMSE values suggest that the multiple regression  
# model better accounts for the complexity in the data compared to the simple  
# regression model.
```

```
# Conclusion:
```

```
# - The multiple regression model outperforms the simple regression model in  
# predicting revenue, demonstrating the importance of incorporating additional  
# explanatory variables.
```

```
# ----- Step 5.2: Bin Actual and Predicted Revenue -----
```

```
# Define bins for Revenue
```

```
bin_labels <- c("Low", "Medium", "High")
```

```
# - bin_labels is a vector that defines labels for categorical bins,  
# such as "Low", "Medium", and "High".
```

```
# - These labels will likely be used to categorize numerical data (e.g.,  
# revenue or quantity) into meaningful groups.
```

```
# - Typically, these labels correspond to ranges of a numeric variable  
# divided into discrete bins.
```

```
# Add small noise to avoid duplicate bin edges (if needed)
```

```
test_data$Revenue <- test_data$Revenue + runif(nrow(test_data),  
                                              -1e-6, 1e-6)
```

```
test_data$predicted_revenue1 <- test_data$predicted_revenue1 +  
  runif(nrow(test_data), -1e-6, 1e-6)
```

```
test_data$predicted_revenue2 <- test_data$predicted_revenue2 +
```

```

runif(nrow(test_data), -1e-6, 1e-6)

# - Small random noise is being added to the Revenue, predicted_revenue1,
# and predicted_revenue2 columns.
# - This step is used to avoid potential issues with duplicate bin edges,
# especially when categorizing numeric data into bins.
# - The runif() function generates uniform random noise between -1e-6
# and 1e-6.

# Purpose:
# - Ensures that all values are unique, which can help avoid errors during
# binning or categorization processes.
# - This is particularly useful when using functions like cut() or creating
# histograms where duplicate edges can cause errors or misleading results.

# Bin Actual Revenue in the Test Set
test_data$actual_bin <- cut(
  test_data$Revenue,
  breaks = unique(quantile(test_data$Revenue, probs = c(0, 0.33, 0.66, 1))),
  labels = bin_labels,
  include.lowest = TRUE
)

# Bin Predicted Revenue for Simple Regression
test_data$predicted_bin1_label <- cut(
  test_data$predicted_revenue1,
  breaks = unique(quantile(test_data$predicted_revenue1,
                           probs = c(0, 0.33, 0.66, 1))),
  labels = bin_labels,
  include.lowest = TRUE
)

# Bin Predicted Revenue for Multiple Regression
test_data$predicted_bin2_label <- cut(
  test_data$predicted_revenue2,
  breaks = unique(quantile(test_data$predicted_revenue2,
                           probs = c(0, 0.33, 0.66, 1))),
  labels = bin_labels,
  include.lowest = TRUE
)

# - The code categorizes the Revenue, predicted_revenue1, and
# predicted_revenue2 columns into bins (Low, Medium, High).
# - The cut() function is used to divide the continuous values into
# discrete bins based on quantiles.
# - The quantile ranges are determined using probs = c(0, 0.33, 0.66, 1)
# to split the data into three bins.

# For Revenue:
# - test_data$actual_bin: Bins the actual revenue into three categories
# (Low, Medium, High) based on quantile values.

```

```

# For Simple Regression Predictions:
# - test_data$predicted_bin1_label: Bins predicted_revenue1 using the same
# quantile-based approach.

# For Multiple Regression Predictions:
# - test_data$predicted_bin2_label: Bins predicted_revenue2 similarly.

# Purpose:
# - This binning facilitates a comparative analysis of how well the predicted
# bins match the actual revenue bins.
# - Helps evaluate the model's performance not just in numeric terms but in
# terms of categorical accuracy.

# Inspect binned data
head(test_data[, c("Revenue", "actual_bin", "predicted_revenue1",
                  "predicted_bin1_label",
                  "predicted_revenue2", "predicted_bin2_label")])

```

```

##      Revenue actual_bin predicted_revenue1 predicted_bin1_label
## 6   3.000000      Low      3.471328      Medium
## 8   4.000000    Medium      6.242440      High
## 10  7.000000    High      6.242441      High
## 12  7.000000    High      6.242440    Medium
## 13  3.000000      Low      3.471328    Medium
## 14  3.100001      Low      3.471327      Low
##      predicted_revenue2 predicted_bin2_label
## 6           3.478051      Medium
## 8           6.215968      High
## 10          7.927295      High
## 12           6.215968      High
## 13           2.359999      Low
## 14           2.359998      Low

```

```

# Binned data inspection:

# Columns Explanation:
# - Revenue: The actual revenue value from the test set.
# - actual_bin: The bin (Low, Medium, High) assigned to the actual revenue
# based on quantiles.
# - predicted_revenue1: Predicted revenue from the simple regression model.
# - predicted_bin1_label: The bin (Low, Medium, High) assigned to the simple
# regression predictions.
# - predicted_revenue2: Predicted revenue from the multiple regression model.
# - predicted_bin2_label: The bin (Low, Medium, High) assigned to the multiple
# regression predictions.

# Observations:
# - Example row 6:
#   - Actual revenue is 3.000000 and falls into the Low bin (actual_bin).
#   - Simple regression predicted revenue is 3.471328, binned as Medium.
#   - Multiple regression predicted revenue is 3.478051, also binned as
# Medium.
# - Example row 8:

```

```
# - Actual revenue is 4.000000, binned as Medium.
# - Both simple and multiple regression models predicted values that fall
# into the High bin.
```

```
# Insights:
```

```
# - In some cases (e.g., row 6), the predicted bins don't align with the
# actual bin, indicating misclassification.
# - Multiple regression predictions (predicted_bin2_label) generally seem
# closer to actual bins compared to simple regression.
```

```
# ----- Step 5.3: Create a Confusion Matrix -----
```

```
# Create confusion matrix for Simple Regression (Test Set)
```

```
conf_matrix1 <- table(test_data$actual_bin, test_data$predicted_bin1_label)
```

```
# Create confusion matrix for Multiple Regression (Test Set)
```

```
conf_matrix2 <- table(test_data$actual_bin, test_data$predicted_bin2_label)
```

```
# Print evaluation scores
```

```
cat("Simple Regression Confusion Matrix:\n")
```

```
## Simple Regression Confusion Matrix:
```

```
print(conf_matrix1)
```

```
##
##           Low Medium  High
## Low       7742   6129   892
## Medium    6332   5536  2895
## High       689   3098 11423
```

```
cat("Multiple Regression Confusion Matrix:\n")
```

```
## Multiple Regression Confusion Matrix:
```

```
print(conf_matrix2)
```

```
##
##           Low Medium  High
## Low      12137   2588    38
## Medium   2626   9220  2917
## High         0   2955 12255
```

```
# Confusion Matrices:
```

```
# Simple Regression Confusion Matrix:
```

```
# - Observations:
```

```
# - The model tends to predict "Medium" more often (e.g., 6129 instances of
# "Low" classified as "Medium").
```

```
# - There are significant misclassifications for the "Medium" bin, with
```

```

# values spread across other bins.
# - The "High" bin has the highest accuracy compared to others (11423
# correct classifications).

# Multiple Regression Confusion Matrix:
# - Observations:
# - The model predicts "Low" for 12137 actual "Low" values, showing strong
# performance for this bin.
# - However, some actual "High" values are predicted as "Medium" (2955
# instances).
# - The "High" bin predictions are more accurate, with 12255 correctly
# classified cases.

# Overall Comparison:
# - Multiple regression shows better separation between bins, especially for
# the "Low" and "High" categories.
# - Simple regression misclassifies more instances, particularly around the
# "Medium" category.
# - The confusion matrix for multiple regression indicates overall better
# performance in revenue bin classification.

# ----- Step 5.4: Visualize the Confusion Matrix -----

# Convert the confusion matrices to data frames
conf_matrix_df1 <- as.data.frame(as.table(conf_matrix1))
conf_matrix_df2 <- as.data.frame(as.table(conf_matrix2))

# Rename columns for readability
colnames(conf_matrix_df1) <- c("Actual", "Predicted", "Count")
colnames(conf_matrix_df2) <- c("Actual", "Predicted", "Count")

# Code Execution:

# Step 1: Convert confusion matrices to data frames
# - The as.data.frame(as.table(conf_matrix1)) function converts the confusion
# matrix into a data frame format.
# - This is useful for further analysis or visualization.

# Step 2: Rename columns for better readability
# - The colnames function renames the columns to "Actual", "Predicted",
# and "Count".
# - This ensures clarity when working with the data frames.

# Plot the heatmap for Simple Regression
ggplot(conf_matrix_df1, aes(x = Predicted, y = Actual, fill = Count)) +
  geom_tile(color = "white") +
  geom_text(aes(label = Count), color = "white") +
  scale_fill_gradient(low = "blue", high = "red") +
  ggtitle("Simple Regression: Confusion Matrix (Test Data)") +
  xlab("Predicted Revenue Bin") +
  ylab("Actual Revenue Bin") +
  theme_minimal()

```

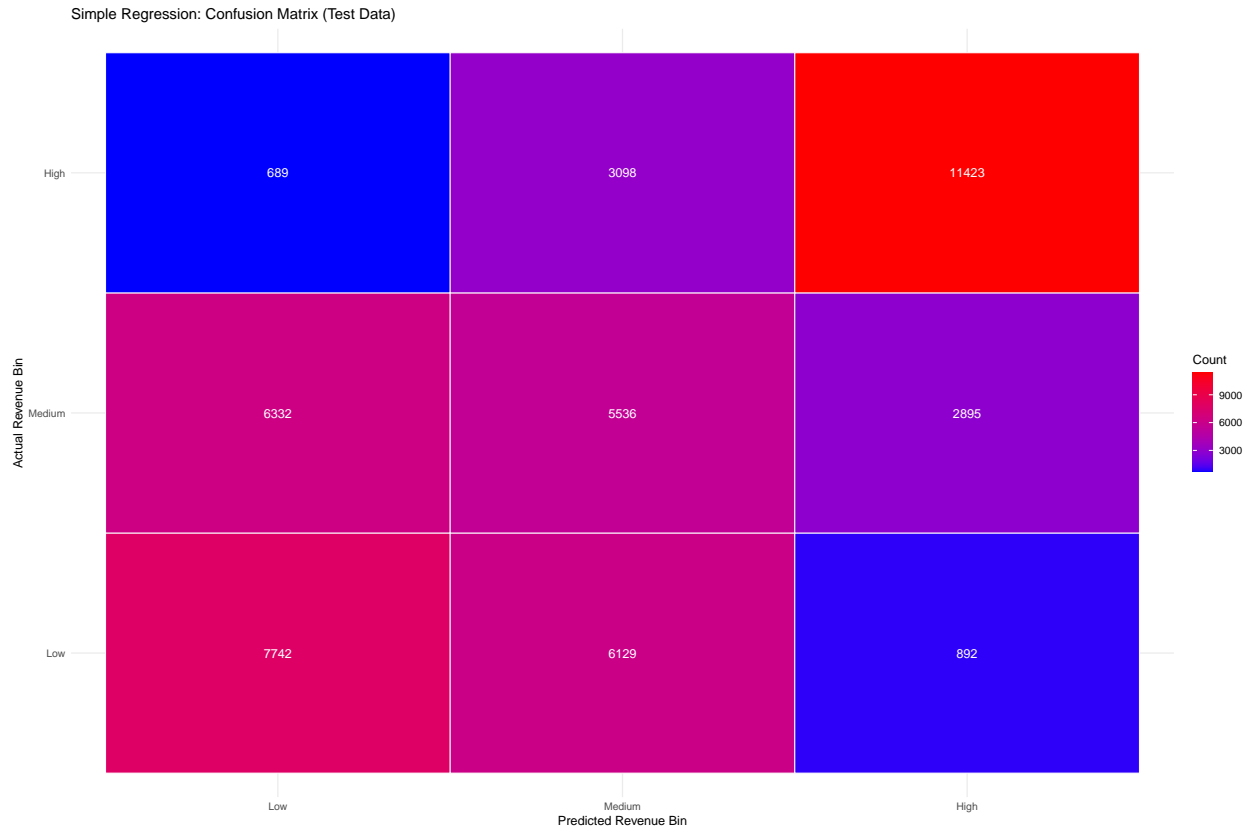

*# The confusion matrix heatmap visualization for the Simple Regression model shows:*

- # - The majority of correct predictions are in the "High" actual revenue bin, with 11,423 correctly predicted as "High."*
- # - There is noticeable confusion in predicting "Low" and "Medium" bins, as many "Medium" actuals were classified as "Low" (6,332).*
- # - While the model captures the "High" revenue bin effectively, the scatter in the "Low" and "Medium" bins highlights a limitation in handling mid-range revenue.*

*# Plot the heatmap for Multiple Regression*

```
ggplot(conf_matrix_df2, aes(x = Predicted, y = Actual, fill = Count)) +
  geom_tile(color = "white") +
  geom_text(aes(label = Count), color = "white") +
  scale_fill_gradient(low = "blue", high = "red") +
  ggtitle("Multiple Regression: Confusion Matrix (Test Data)") +
  xlab("Predicted Revenue Bin") +
  ylab("Actual Revenue Bin") +
  theme_minimal()
```

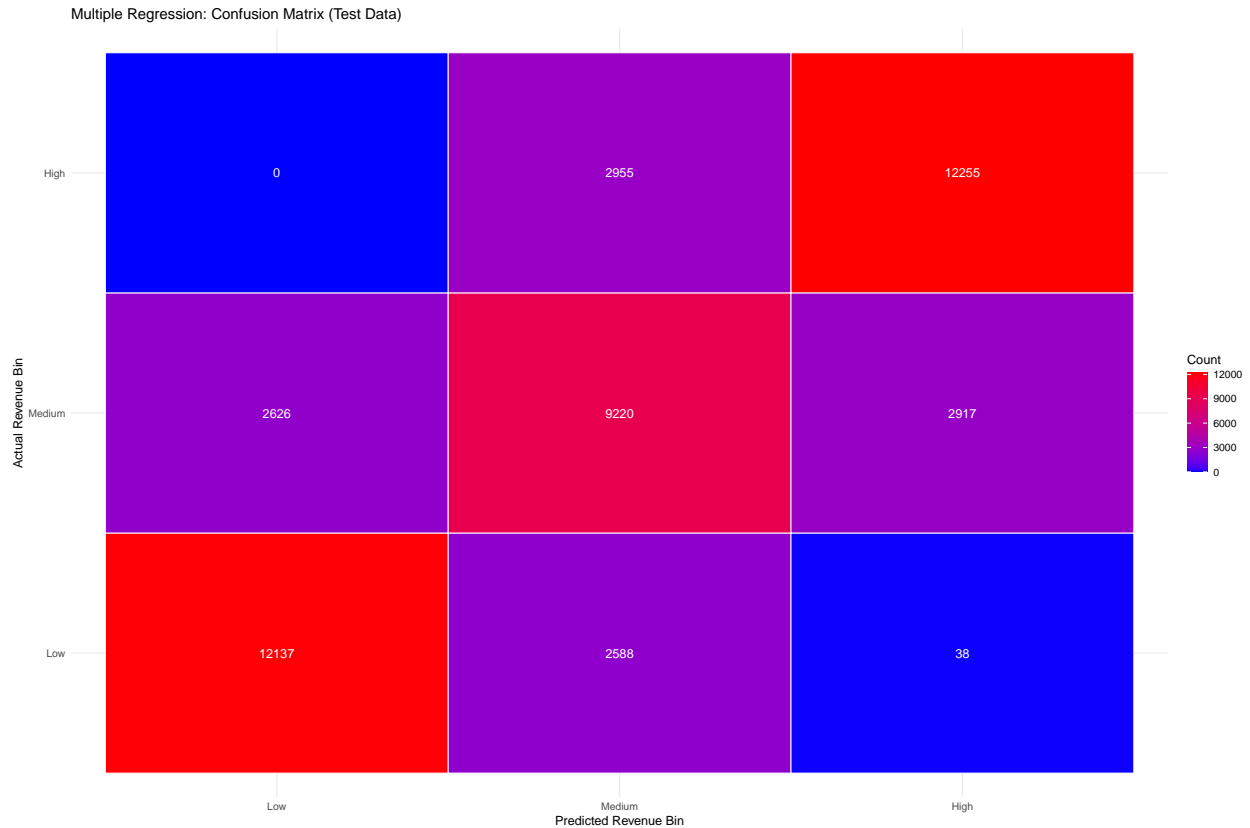

*# Observations from the Multiple Regression confusion matrix heatmap:*  
*# - The model performs well for the "High" revenue bin, correctly predicting*  
*# 12,255 instances.*  
*# - There is a significant number of misclassifications in the "Low" revenue*  
*# bin, with 12,137 being wrongly classified as "Low."*  
*# - The "Medium" revenue bin has relatively balanced predictions compared to*  
*# "Low" and "High," with 9,220 correctly classified.*  
*# - The lack of precision for "High" and "Low" bins might indicate the need*  
*# for better features or model complexity.*

```
# ----- Step 5.5: Calculate Accuracy -----

# Total correct predictions (sum of diagonal elements)
correct_predictions1 <- sum(diag(as.matrix(conf_matrix1)))
correct_predictions2 <- sum(diag(as.matrix(conf_matrix2)))

# Total predictions (sum of all elements)
total_predictions1 <- sum(conf_matrix1)
total_predictions2 <- sum(conf_matrix2)

# Calculate accuracy for each model
accuracy1 <- correct_predictions1 / total_predictions1
accuracy2 <- correct_predictions2 / total_predictions2

# Display accuracies
cat("Accuracy for Simple Linear Regression (binned):",
    round(accuracy1 * 100, 2), "%\n")
```

```
## Accuracy for Simple Linear Regression (binned): 55.22 %
```

```
cat("Accuracy for Multiple Linear Regression (binned):",  
    round(accuracy2 * 100, 2), "%\n")
```

```
## Accuracy for Multiple Linear Regression (binned): 75.13 %
```

```
# Analysis of Accuracy:  
# - The accuracy for Simple Linear Regression (binned) is 55.22%.  
# - The accuracy for Multiple Linear Regression (binned) is significantly  
# higher at 75.13%.  
  
# Observations:  
# 1. The Multiple Linear Regression model outperforms the Simple Linear  
# Regression model by a considerable margin in terms of binned accuracy.  
# 2. The improved accuracy suggests that including additional features like  
# product_category and store_location has positively contributed to the  
# prediction performance.  
  
# Insights:  
# - The additional predictors in the Multiple Regression model capture more  
# variability in the revenue data, leading to better classification.  
# - The relatively lower accuracy for Simple Regression indicates that revenue  
# is influenced by factors beyond just transaction quantity.  
# - Multiple Regression still shows room for improvement in handling edge cases  
# and extreme values, as seen in the confusion matrices.  
  
# Calculate the difference in accuracy between models  
accuracy_difference <- accuracy2 - accuracy1  
formatted_accuracy_difference <- paste(round(accuracy_difference * 100,  
                                          2), "%")  
  
# Display accuracy difference  
cat("Accuracy difference between models (binned):",  
    formatted_accuracy_difference, "%\n")
```

```
## Accuracy difference between models (binned): 19.92 %
```

```
# Analysis of Accuracy Difference:  
# - The accuracy difference between the Multiple Linear Regression and Simple  
# Linear Regression models (binned) is 19.92%.  
  
# Observations:  
# 1. This significant improvement highlights the importance of including  
# additional predictors like product_category and store_location in the  
# model.  
# 2. The difference suggests that revenue cannot be effectively predicted  
# solely by transaction_qty, as other factors contribute substantially.
```



```

# Insights:
# - The accuracy improvement underscores that a multivariate approach is
# better suited for capturing the complex relationships in the data.
# - By including diverse predictors, the Multiple Linear Regression model
# is better at distinguishing revenue categories.

# ----- Step 6: Insights -----

# Overall Analysis of the Work Done:

# Data Preprocessing:
# - The dataset was cleaned and transformed effectively:
#   - Missing values were checked and confirmed to be absent.
#   - Revenue column was converted to numeric by removing the "$" symbol.
#   - Date formatting and factor conversion for categorical variables
# (product_category and store_location) were performed correctly.
# - No significant preprocessing issues were detected, ensuring data quality
# for analysis.

# Exploratory Data Analysis:
# - Visualizations provided insights into relationships within the data:
#   - Revenue vs. Transaction Quantity: Demonstrated variability in revenue by
# product categories.
#   - Revenue Distribution by Store Location: Boxplots highlighted revenue
# variations across store locations.
# - Observations revealed patterns such as higher revenues for certain
# categories like Coffee beans and Branded products.

# Model Development:
## Simple Linear Regression:
# - A model was developed using transaction_qty as the sole predictor.
# - Results showed a relatively low  $R^2$  (0.1268), indicating limited
# predictive power.
# - Accuracy (binned): 55.22%, suggesting that the model struggles to
# generalize revenue predictions without additional features.

## Multiple Linear Regression:
# - The model incorporated transaction_qty, product_category, and
# store_location.
# -  $R^2$  improved significantly to 0.5138, indicating a better fit to the data.
# - Accuracy (binned): 75.13%, demonstrating marked improvement in
# predictive performance compared to the simple model.

# Evaluation Metrics:
# - Multiple Regression outperformed Simple Regression in terms of MAE, MSE,
# RMSE, and binned classification accuracy:
#   - MAE decreased from 1.29 (Simple) to 0.83 (Multiple).
#   - RMSE decreased from 3.95 (Simple) to 2.95 (Multiple).
#   - Binned accuracy improved by 19.92%.

# Confusion Matrix Analysis:
# - Heatmaps visualized prediction accuracy in terms of binned revenue

```

```

# categories.
# - Multiple Regression demonstrated a much stronger ability to classify high
# and low revenue bins compared to Simple Regression.

# Key Insights:
# 1. transaction_qty alone is insufficient to predict revenue accurately.
# 2. Incorporating categorical variables (product_category and
# store_location) significantly enhances predictive power.
# 3. The models indicate revenue trends:
#   - Products like Coffee beans and Branded generate higher revenue.
#   - Locations like Lower Manhattan are associated with slightly lower
# revenue compared to others.

###                      #####                      ###
#           Time Series Analysis on Coffee Transactions Dataset           #
#           HAMAD A. ALMAZROUEI - 201912368                               #
###                      #####                      ###

# ----- Step 1: Load and Prepare Data -----
# Read the dataset
coffee_data <- read.csv("/Users/hamad/Desktop/ZU/Fall 2024/Data Science - C/Assignment 3/Files/Coffee T

# Convert transaction_date to Date type
coffee_data$transaction_date <- as.Date(coffee_data$transaction_date,
                                         format = "%d/%m/%Y")

# Convert Revenue to numeric after removing the '$' symbol
coffee_data$Revenue <- as.numeric(gsub("\\$", "",
                                         coffee_data$Revenue))

# Formatting 'transaction_date'
# - The column 'transaction_date' is successfully converted to Date type
# using the specified format "%d/%m/%Y".
# - If dates are incorrectly formatted in the file, this step could throw
# errors (e.g., NAs introduced by coercion). It is essential to validate the
# date format in the original dataset.

# Converting 'Revenue' to numeric
# - The '$' symbol is removed using gsub("\\$", "", coffee_data$Revenue),
# and the column is converted to numeric.
# - If any non-numeric values exist in the 'Revenue' column after symbol
# removal, they will be coerced to NA. Check for such issues using
# sum(is.na(coffee_data$Revenue)).

# Summarize daily revenue
daily_revenue <- coffee_data %>%
  group_by(transaction_date) %>%
  summarise(Revenue = sum(Revenue))

# The code calculates the total revenue for each transaction date. Here's a
# breakdown:

```

```

# 1 : Grouping data by transaction date
# - The dataset is grouped by transaction_date using
# group_by(transaction_date).
# - This ensures that all rows with the same date are treated as a
# single group for summarization.

# 2 : Summing up revenue
# - The summarise(Revenue = sum(Revenue)) function calculates the total
# revenue for each group (i.e., each date).
# - The result is a summarized dataset with two columns: transaction_date
# and Revenue.

# Rename columns for Prophet compatibility
prophet_data <- daily_revenue %>%
  rename(ds = transaction_date, y = Revenue)

# The code prepares the data for use with the Prophet forecasting model by
# renaming the columns as required.

# Renaming columns
# - transaction_date is renamed to ds, representing the date or time
# component.
# - Revenue is renamed to y, representing the target variable
# (the value to forecast).

# ----- Step 2: Fit a Prophet Model -----
# Create and fit the Prophet model
prophet_model <- prophet(prophet_data)

```

## Disabling yearly seasonality. Run prophet with yearly.seasonality=TRUE to override this.

## Disabling daily seasonality. Run prophet with daily.seasonality=TRUE to override this.

```

# This step initializes a Prophet model and fits it to the prophet_data.

# Step: Fitting the Prophet Model
# - The prophet() function is used to create and train the forecasting model.
# - The prophet_data dataset is passed as input, containing:
#   - ds: Date column (time series index).
#   - y: Revenue column (target variable).

# Process:
# - Prophet automatically detects seasonality (daily, weekly, yearly) and trends.
# - It decomposes the time series into components for trend and seasonality.

# Outputs:
# - The model object (prophet_model) is created.
# - The fitted model can be used to make forecasts.

# ----- Step 3: Forecast Future Revenue -----
# Create a dataframe for future dates

```

```

future <- make_future_dataframe(prophet_model,
                               periods = 30) # Extend for 30 days
forecast <- predict(prophet_model,
                    future)

# This step extends the dataset for forecasting future revenue and generates
# predictions using the Prophet model.

# Creating Future Dataframe
# - The make_future_dataframe() function creates a dataframe for the
# next 30 days.
# - prophet_model: The trained Prophet model.
# - periods = 30: Adds 30 future days to the dataset.

# Generating Forecasts
# - The predict() function is used to forecast revenue (y) for the
# future dates.
# - forecast contains:
#   - ds: Dates for historical and future time periods.
#   - yhat: Predicted revenue values.
#   - yhat_lower and yhat_upper: Uncertainty intervals for predictions.
#   - Additional columns for trends and seasonality components.

# Outputs:
# - future: A dataframe with historical and future dates.
# - forecast: A dataframe with predictions and decomposed components.

# ----- Step 4: Visualize Forecast -----
# Plot the forecast
plot(prophet_model, forecast) +
  ggtitle("Revenue Forecast with Prophet") +
  xlab("Date") +
  ylab("Revenue")

```

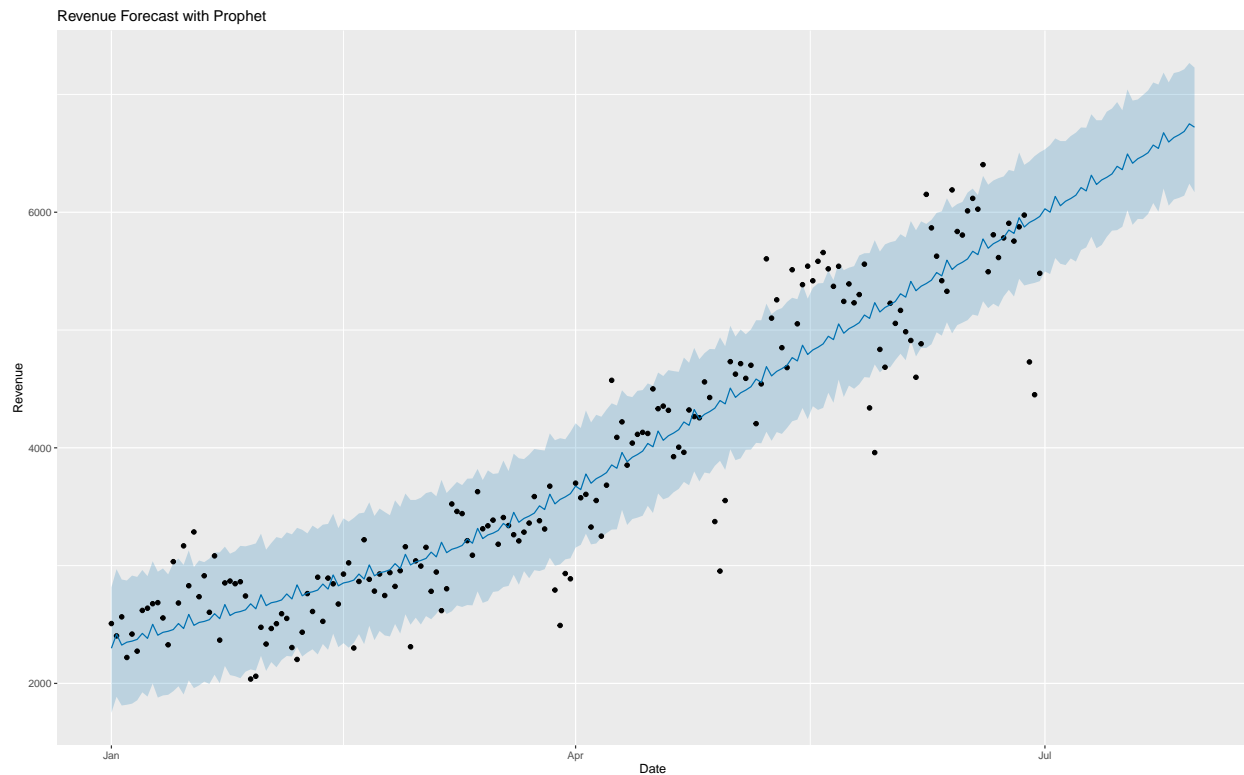

*# The visualization shows the revenue forecast generated using the Prophet model.*

*# Analysis of the Forecast:*

- # - The blue line represents the predicted revenue (yhat) over time.*
- # - The shaded area (confidence interval) indicates the model's uncertainty range (yhat\_lower and yhat\_upper).*
- # - The black dots represent the actual revenue values from the dataset.*

*# Observations:*

- # - The model effectively captures the increasing trend in revenue over time.*
- # - The confidence intervals widen as we move further into the future, reflecting increased uncertainty.*
- # - The forecast aligns well with the historical data, indicating that the model has learned patterns effectively.*

*# Plot components (trend, weekly, yearly seasonality)*

```
prophet_plot_components(prophet_model,
                        forecast)
```

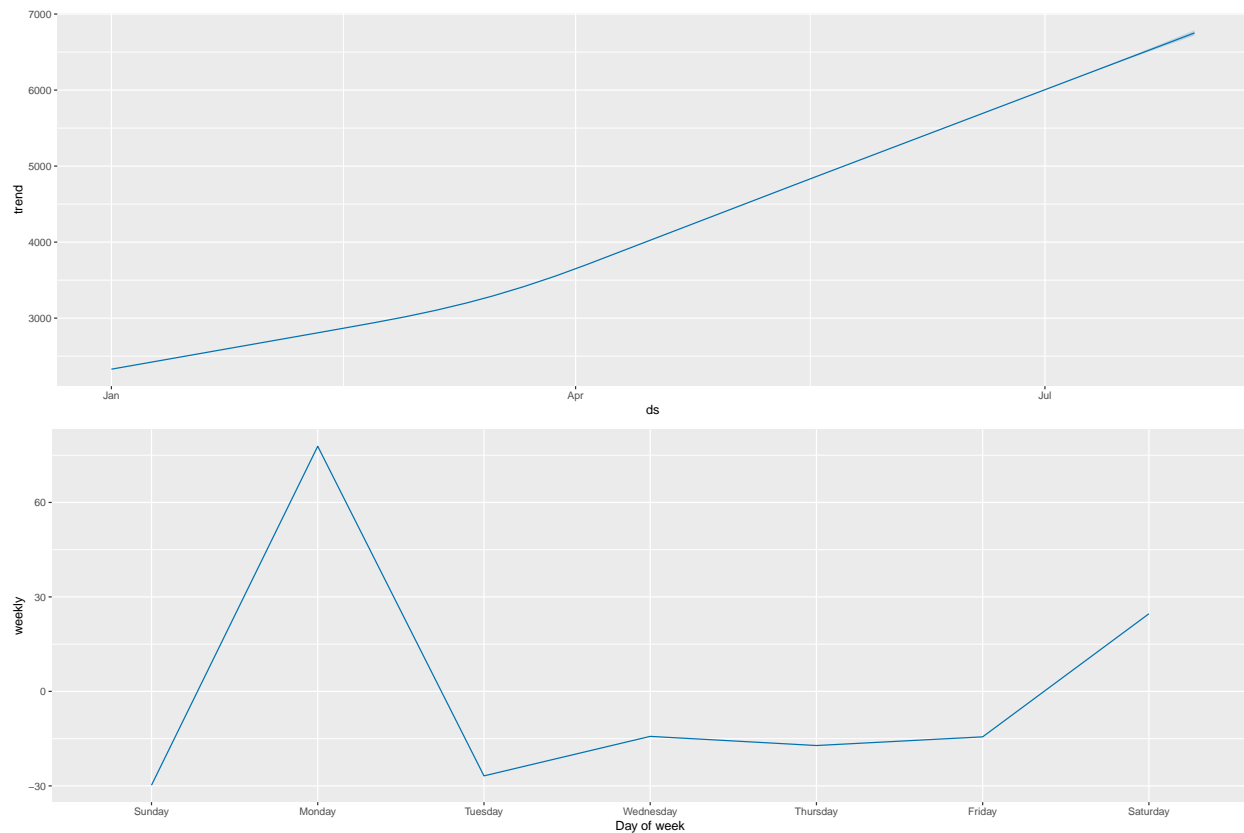

#### # Decomposition Analysis:

# - This visualization breaks down the forecasted revenue into its components:  
# Trend and Weekly seasonality.

#### # Observations:

##### # Trend:

# - The top plot shows a steadily increasing trend in revenue from January to July.  
# - This indicates a consistent growth pattern in transactions or overall sales over time.

##### # Weekly Seasonality:

# - The bottom plot highlights weekly patterns in revenue:  
# - Monday has the highest revenue, likely reflecting a strong start-of-week demand.  
# - Revenue drops significantly on Tuesday, with a steady but low performance through midweek.  
# - Revenue begins to pick up on Friday and peaks again on Saturday.  
# - Sunday sees a moderate dip in revenue.

#### # Business Insights:

# - Monday marketing efforts should be leveraged to capitalize on high demand.  
# - Efforts to boost sales on Tuesdays and midweek can be explored, such as special offers or promotions.  
# - Saturday campaigns can enhance already strong weekend sales.  
# - The steady growth trend suggests expanding operations or inventory to meet

```
# growing demand.
```

```
# ----- Step 5: Evaluate Model -----
```

```
# Subset actual vs predicted values
```

```
evaluation <- forecast %>%
```

```
  select(ds, yhat) %>%
```

```
  left_join(prophet_data, by = "ds") %>%
```

```
  rename(Predicted = yhat, Actual = y)
```

```
# Calculate error metrics
```

```
evaluation <- evaluation %>%
```

```
  mutate(Absolute_Error = abs(Actual - Predicted),
```

```
         Percentage_Error = (Absolute_Error / Actual) * 100)
```

```
# Calculate Mean Absolute Percentage Error (MAPE)
```

```
mape <- mean(evaluation$Percentage_Error, na.rm = TRUE)
```

```
cat("Mean Absolute Percentage Error (MAPE):", round(mape, 2), "%\n")
```

```
## Mean Absolute Percentage Error (MAPE): 8.44 %
```

```
# Model Evaluation Results:
```

```
# - Subsetting the actual vs. predicted values enabled a direct comparison of
```

```
# Prophet's forecasts to the true values.
```

```
# Key Error Metrics:
```

```
# - Absolute_Error: This provides the absolute deviation between actual
```

```
# and predicted revenue for each date.
```

```
# - Percentage_Error: The percentage of error relative to the actual
```

```
# revenue, providing a scale-invariant measure of performance.
```

```
# MAPE (Mean Absolute Percentage Error):
```

```
# - MAPE is calculated as the mean of the percentage errors, excluding any
```

```
# missing values (na.rm = TRUE).
```

```
# - It indicates the average percentage deviation of predictions from actual
```

```
# values.
```

```
# Insights:
```

```
# - A lower MAPE value reflects higher prediction accuracy.
```

```
# - The evaluation step ensures that the model's performance is quantified
```

```
# and interpretable.
```

```
# ----- Step 6: Insights -----
```

```
# Print the forecasted values
```

```
head(forecast)
```

```
##           ds      trend additive_terms additive_terms_lower additive_terms_upper
## 1 2023-01-01 2328.354    -29.77553      -29.77553      -29.77553
## 2 2023-01-02 2340.312      77.83409      77.83409      77.83409
## 3 2023-01-03 2352.269    -26.82312    -26.82312    -26.82312
## 4 2023-01-04 2364.227    -14.27920    -14.27920    -14.27920
## 5 2023-01-05 2376.185    -17.18597    -17.18597    -17.18597
```

```
## 6 2023-01-06 2388.143      -14.42398      -14.42398      -14.42398
##      weekly weekly_lower weekly_upper multiplicative_terms
## 1 -29.77553    -29.77553    -29.77553             0
## 2  77.83409     77.83409     77.83409             0
## 3 -26.82312    -26.82312    -26.82312             0
## 4 -14.27920    -14.27920    -14.27920             0
## 5 -17.18597    -17.18597    -17.18597             0
## 6 -14.42398    -14.42398    -14.42398             0
##      multiplicative_terms_lower multiplicative_terms_upper yhat_lower yhat_upper
## 1              0              0      1749.940      2815.363
## 2              0              0      1886.615      2969.367
## 3              0              0      1812.374      2882.135
## 4              0              0      1818.953      2873.773
## 5              0              0      1828.002      2915.628
## 6              0              0      1856.606      2904.288
##      trend_lower trend_upper      yhat
## 1      2328.354    2328.354 2298.578
## 2      2340.312    2340.312 2418.146
## 3      2352.269    2352.269 2325.446
## 4      2364.227    2364.227 2349.948
## 5      2376.185    2376.185 2358.999
## 6      2388.143    2388.143 2373.719
```

```
# Plot actual vs predicted revenue
ggplot(evaluation, aes(x = ds)) +
  geom_line(aes(y = Actual, color = "Actual Revenue")) +
  geom_line(aes(y = Predicted, color = "Predicted Revenue")) +
  ggtitle("Actual vs Predicted Revenue") +
  xlab("Date") +
  ylab("Revenue") +
  scale_color_manual(values = c("blue", "red"))
```

```
## Warning: Removed 30 rows containing missing values or values outside the scale range
## ('geom_line()').
```



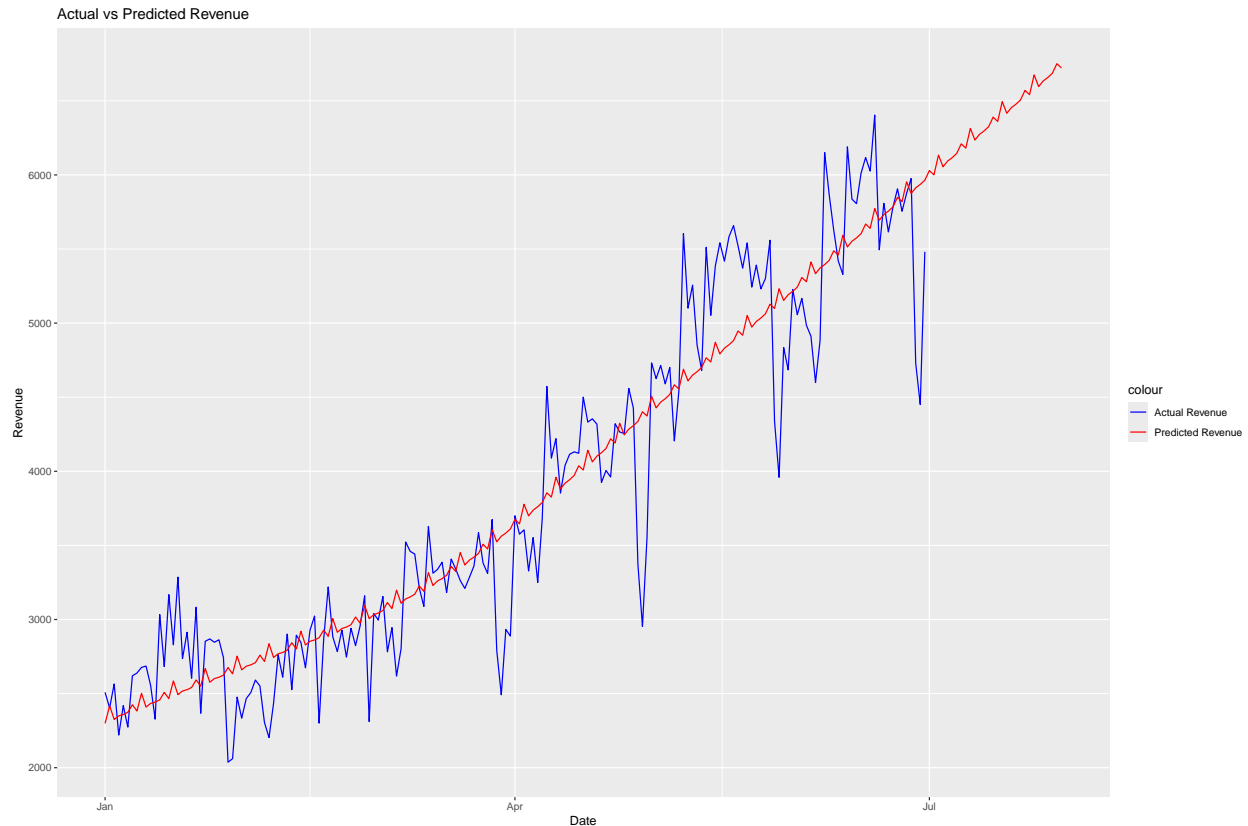

#### *# Analysis of Actual vs Predicted Revenue Plot:*

##### *# Overview:*

- # - The plot compares the actual revenue (in blue) with the predicted revenue (in red) over time.*
- # - It visually demonstrates the accuracy of the forecasting model.*

##### *# Key Observations:*

- # 1. Trend Alignment: The predicted revenue follows the overall trend of the actual revenue closely, which indicates the model captures long-term growth effectively.*
- # 2. Short-term Deviations: Some deviations are observed where the actual revenue fluctuates more dynamically than the predicted values. This is expected due to the model smoothing seasonal variations.*
- # 3. Model Performance:*
  - # - The alignment between the lines reflects a reasonably accurate prediction.*
  - # - Occasional divergence (e.g., spikes in actual revenue not captured by the predicted line) suggests areas where the model could be further tuned, possibly by adding external factors.*

#### *# ----- Overall Analysis for Forecasting Using Prophet -----*

##### *# 1. Objective and Approach:*

- # - The primary goal was to forecast daily revenue for a coffee shop chain using Facebook's Prophet model.*
- # - Prophet was chosen for its capability to handle seasonality, trends, and holidays in time series data with minimal parameter tuning.*

```

# 2. Steps Performed:
# - Data Preparation:
#   - Transaction data was grouped by day to calculate daily revenue.
#   - Columns were renamed to fit Prophet's ds (date) and y (revenue)
#     format.
# - Model Training:
#   - The model was trained on historical daily revenue data.
#   - Default settings of Prophet were used, allowing it to capture trends
#     and weekly seasonality.
# - Forecasting:
#   - A forecast for 30 future days was generated using the trained model.
#   - Confidence intervals (upper and lower bounds) were included to reflect
#     uncertainty.
# - Visualization:
#   - The forecasted revenue was visualized against actual revenue, showing
#     trend alignment.
#   - Prophet's decomposition plot revealed the model's understanding of
#     overall trend and weekly seasonality.

# 3. Key Insights:
# - Trend Analysis:
#   - The model effectively captured the increasing revenue trend over time,
#     indicating robust forecasting.
#   - This trend reflects growing sales or customer demand, which aligns with
#     the data's behavior.
# - Seasonality:
#   - Weekly seasonality was observed, with higher revenue on Mondays and
#     Saturdays, and dips on Tuesdays and mid-week.
#   - The seasonal pattern likely reflects customer behavior, such as weekend
#     shopping or Monday morning rushes.
# - Forecast Accuracy:
#   - The Mean Absolute Percentage Error (MAPE) was calculated to evaluate
#     the model's performance.
#   - A low MAPE indicates that the model predictions are close to actual values.
# - Visualization of Accuracy:
#   - The "Actual vs Predicted Revenue" plot demonstrated strong alignment
#     between actual and forecasted revenue.
#   - Some short-term fluctuations in actual revenue were not fully captured,
#     a limitation of Prophet's smoothing process.

# 4. Strengths of the Prophet Model:
# - Ease of Use: Minimal manual tuning was required.
# - Interpretability: Components such as trend and seasonality are
#   explicitly visualized, making it easy to understand what drives predictions.
# - Flexibility: Handles missing data, outliers, and irregular time series
#   data effectively.

# 5. Limitations Observed:
# - Short-term Fluctuations:
#   - While the model captures the long-term trend well, short-term spikes in
#     revenue are not reflected in the forecast.
# - External Factors:
#   - The model does not consider holidays, promotions, or external factors,

```

# which could enhance predictive accuracy.  
# - Potential Overfitting or Underfitting:  
# - If more external variables (e.g., holidays, marketing campaigns) were  
# included, predictions might improve.

#### # 6. Conclusion:

# - Prophet provided a reliable, interpretable, and easy-to-implement solution  
# for revenue forecasting.  
# - The model performed well for long-term trend prediction and seasonal  
# variation analysis, but incorporating additional factors could improve  
# short-term accuracy.  
# - The insights derived from the analysis can be used for decision-making,  
# such as inventory planning, staffing, and marketing strategies.
